# Supplementary material for: Localized cardiac small molecule trajectories and persistent chemical sequelae in experimental Chagas disease
Source: PubMed Central journal article supplement (PMC10600178; doi:10.1038/s41467-023-42247-w), 2023-10-25
Supplement: 41467_2023_42247_MOESM3_ESM.pdf [file 41467_2023_42247_MOESM3_ESM.pdf]

## **Description of additional supplementary files**

**Supplementary Data 1.** Small molecule features impacted by infection over time. N=15 mice per group and per position. Source data are provided as a Source Data file.

**Supplementary Data 2.** Differentially-expressed genes based on RNA-seq. N=5/group. Source data are provided as a Source Data file. Statistical testing using likelihood-ratio test to determine if "condition" has an effect on gene counts. Pairwise Wald tests to determine which condition "levels" contribute to the difference. All tests are two-sided. P-value correction: BenjaminiHochberg False Discovery Rate (BH FDR). lfcSE, standard error of log<sub>2</sub> fold change

**Supplementary Data 3.** Small molecule features impacted by treatment. N=15 mice per group and per position. Source data are provided as a Source Data file.
