# Supplementary material for: Localized cardiac small molecule trajectories and persistent chemical sequelae in experimental Chagas disease
Source: Nat Commun. 2023 Oct 25;14:6769. doi: 10.1038/s41467-023-42247-w (PMC10600178; doi:10.1038/s41467-023-42247-w)
Supplement: Supplementary file 1 — Supplementary Information [file 41467_2023_42247_MOESM1_ESM.pdf]

# Supplementary Information for: “Localized cardiac small molecule trajectories and persistent chemical sequelae in experimental Chagas disease”

Zongyuan Liu<sup>1,2</sup>, Rebecca Ulrich vonBargen<sup>2,3</sup>, April L. Kendricks<sup>4</sup>, Kate Wheeler<sup>5</sup>, Ana Carolina Leão<sup>6</sup>, Krithivasan Sankaranarayanan<sup>2,7</sup>, Danya A. Dean<sup>1,2</sup>, Shelley S. Kane<sup>1,2</sup>, Ekram Hossain<sup>1,2</sup>, Jeroen Pollet<sup>6</sup>, Maria Elena Bottazzi<sup>6,8</sup>, Peter J. Hotez<sup>6,8</sup>, Kathryn M. Jones<sup>6,8</sup> \*, Laura-Isobel McCall<sup>1,2,7,9</sup> \*

<sup>1</sup>Department of Chemistry and Biochemistry, University of Oklahoma, Norman, OK, United States of America

<sup>2</sup>Laboratories of Molecular Anthropology and Microbiome Research, University of Oklahoma, Norman, OK, United States of America

<sup>3</sup>Department of Biomedical Engineering, University of Oklahoma, Norman, OK, United States of America

<sup>4</sup>Southern Star Medical Research Institute, Houston, TX, United States of America

<sup>5</sup>Department of Biology, University of Oklahoma, Norman, OK, United States of America

<sup>6</sup>Department of Pediatrics, Baylor College of Medicine, Houston, TX, United States of America

<sup>7</sup>Department of Microbiology and Plant Biology, University of Oklahoma, Norman, OK, United States of America

<sup>8</sup>Department of Molecular Virology and Microbiology, Baylor College of Medicine, Houston, TX, United States of America

<sup>9</sup>Present affiliation: Department of Chemistry and Biochemistry, San Diego State University, San Diego, CA, United States of America

\* Correspondence to: Kathryn Jones (kathrynj@bcm.edu) or Laura-Isobel McCall (Lmccall@sdsu.edu)

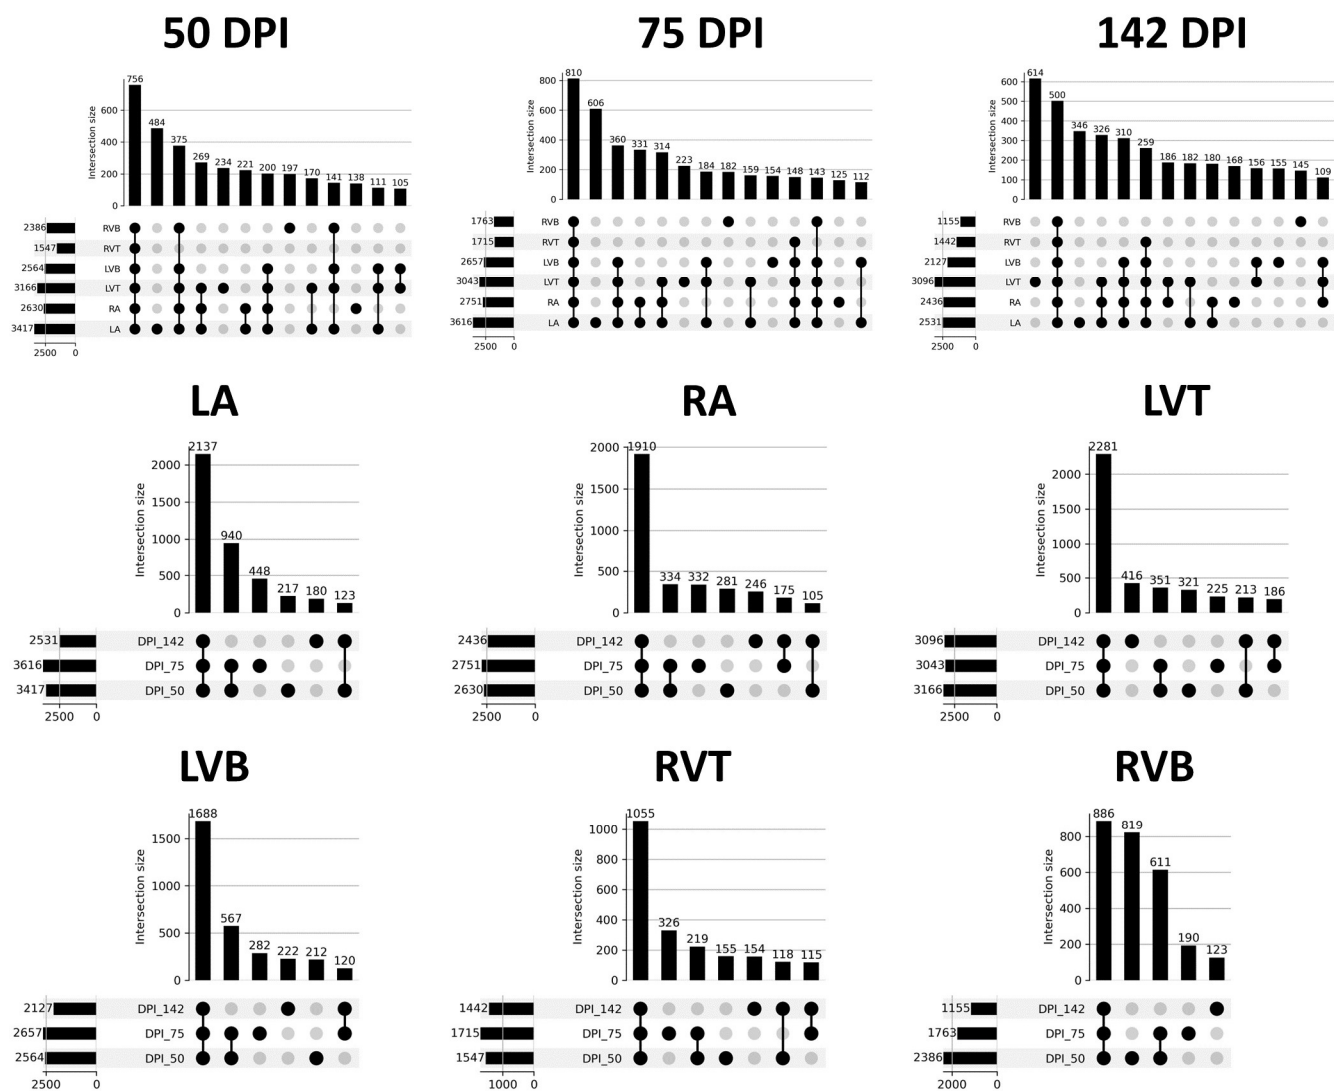

**Supplementary Figure 1. UpSet plot of overlap between detected small molecules across 6 heart sections and timepoints.** RA, right atrium. LA, left atrium. RVT, right ventricle top. RVB, right ventricle bottom. LVT, left ventricle top. LVB, left ventricle bottom. DPI, days post-infection. N=15 mice per group and per position. Source data are provided as a Source Data file.

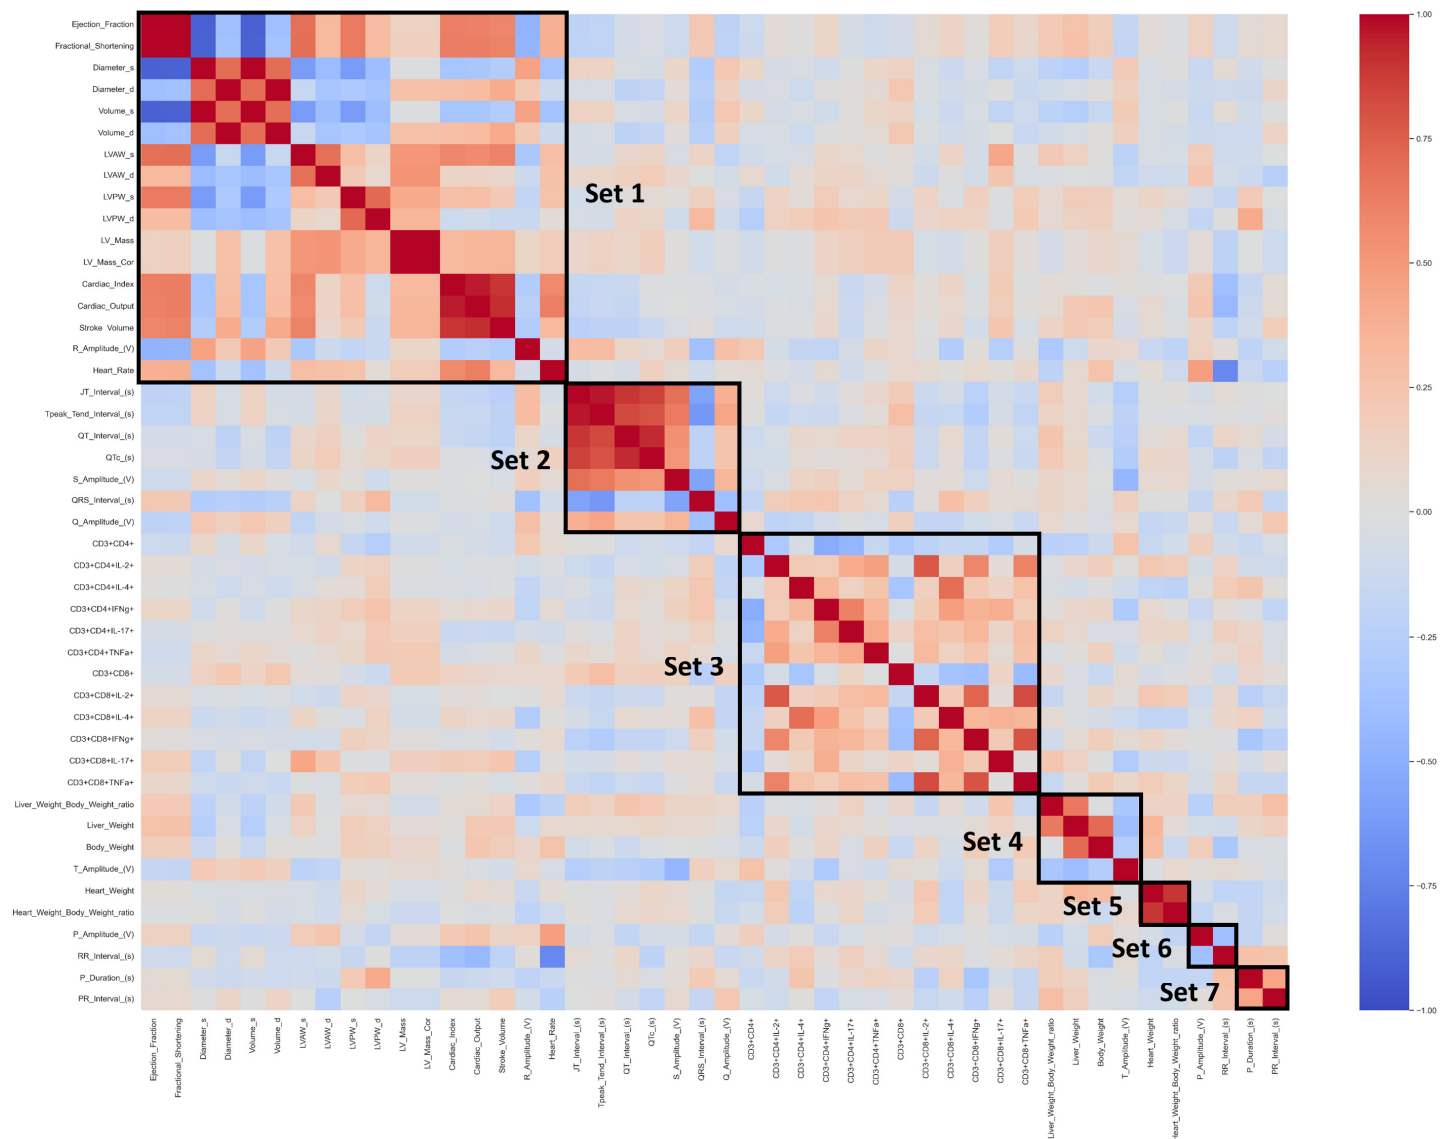

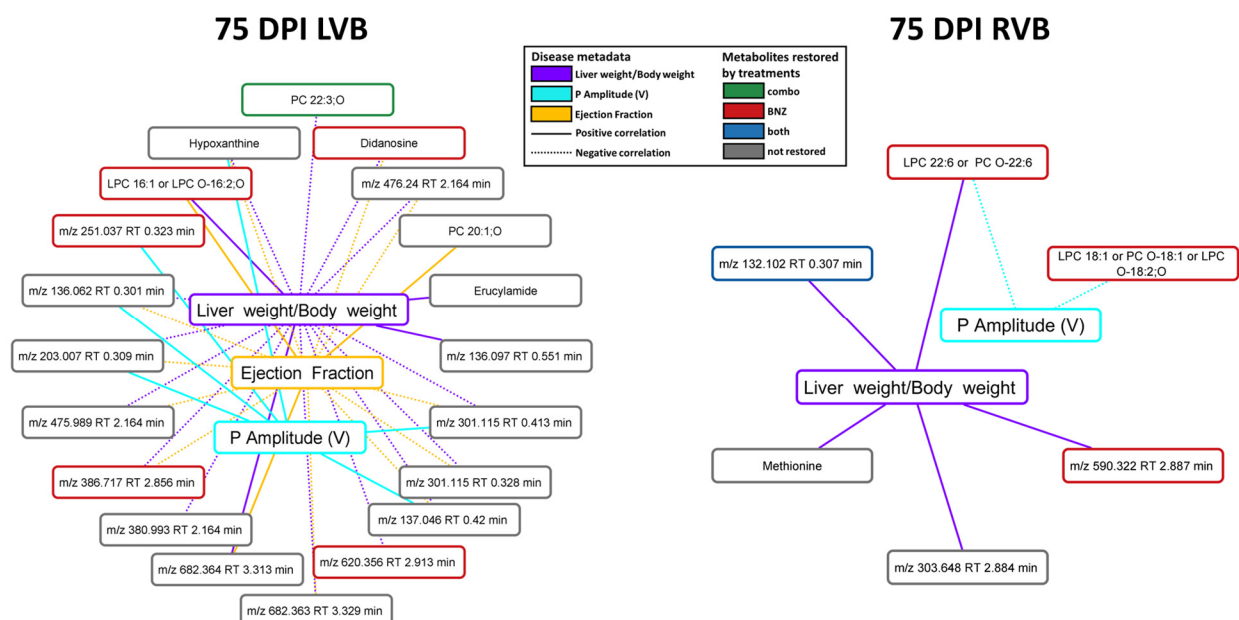

**Supplementary Figure 3. Correlation between disease metadata and small molecule peak area at 75 DPI.** Solid lines indicate a positive correlation coefficient between disease metadata and small molecules; dotted lines indicate a negative correlation coefficient between disease metadata and small molecules. Correlation line colors relate to the specific correlated metadata category. Small molecule box colors indicate feature restoration status: green for features restored by combo treatment, red for features restored by BNZ treatment, blue for features restored by both treatments, and grey for features not restored by any treatment. Note the greater number of not-restored features correlated to the metadata in LVB. RVB, right ventricle bottom. LVB, left ventricle bottom. DPI, days post-infection. N=15 mice per group and per position. Source data are provided as a Source Data file.

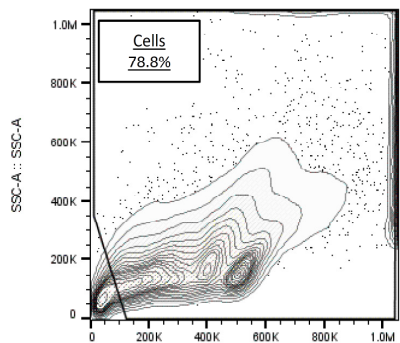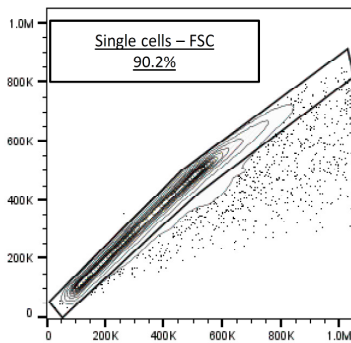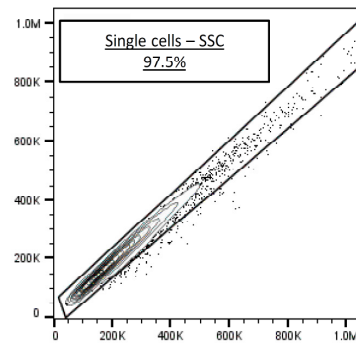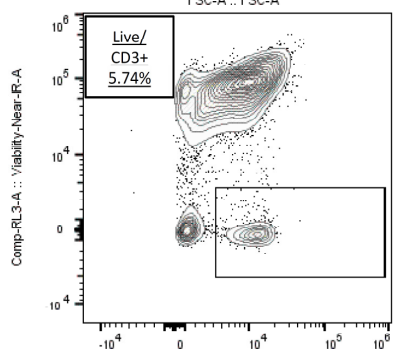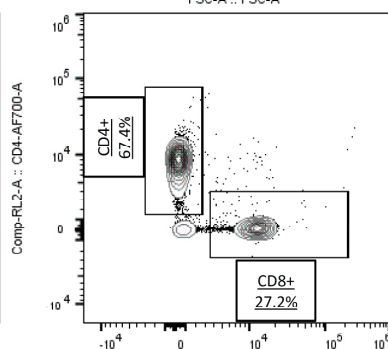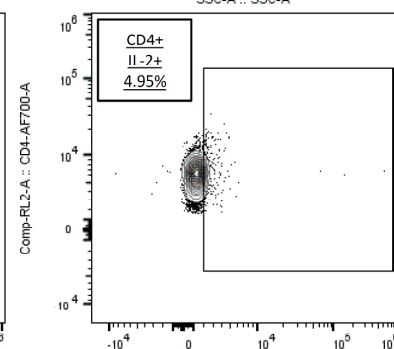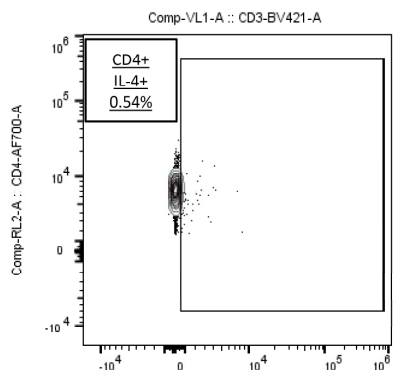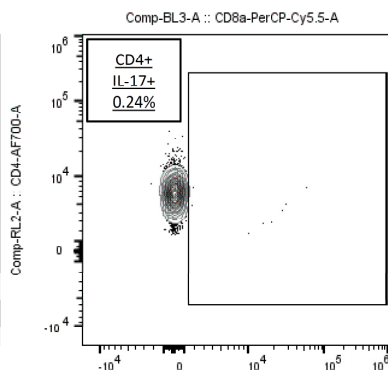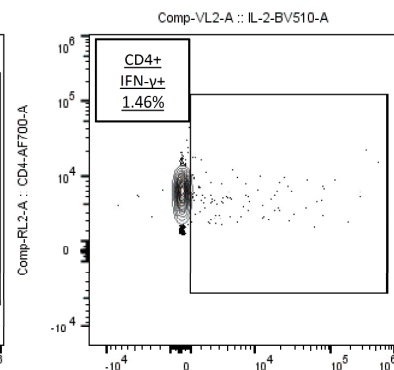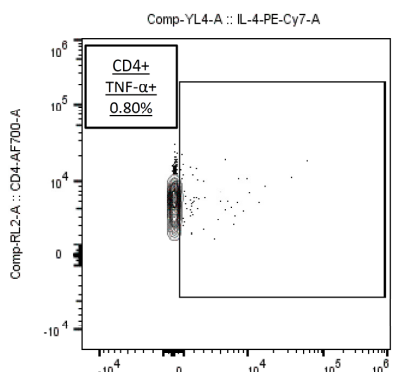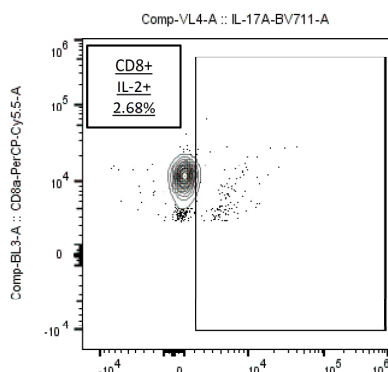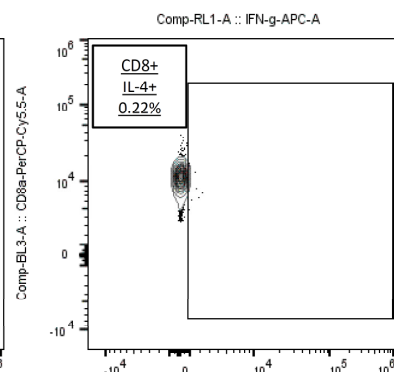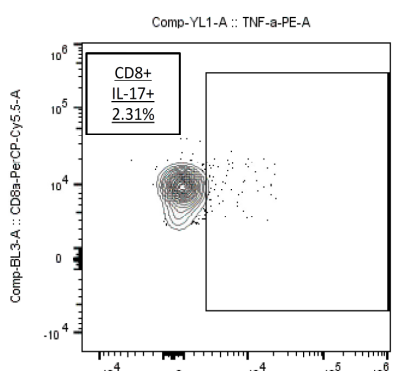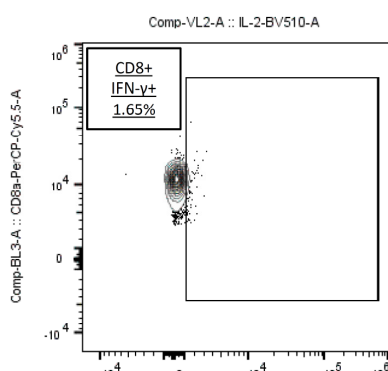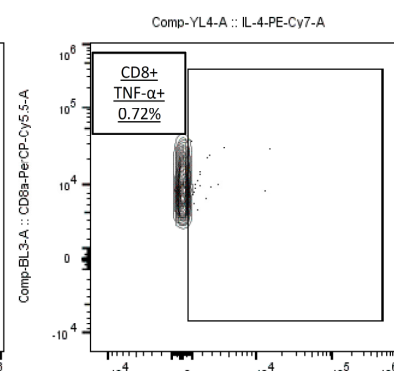

Comp-VL4-A :: IL-17A-BV711-A

Comp-RL1-A :: IFN-γ-APC-A

Comp-VL1-A :: TNF-α-PE-A

**Supplementary Figure 4. Representative flow plots of gating strategy.** Splenocytes restimulated in vitro as described were acquired on a LSR Fortessa Cell Analyzer (BD Biosciences), collecting a minimum of 25,000 total events in a live gate for analysis. Analysis gates were set on live CD3+CD4+ or live CD3+CD8+ cells. Gates to enumerate cytokine-producing cells were set using the FMO strategy as described. All data was analyzed using FlowJo 10.8.1 software as described.

## PCoA plot with TIC normalization

## PCoA plot without TIC normalization

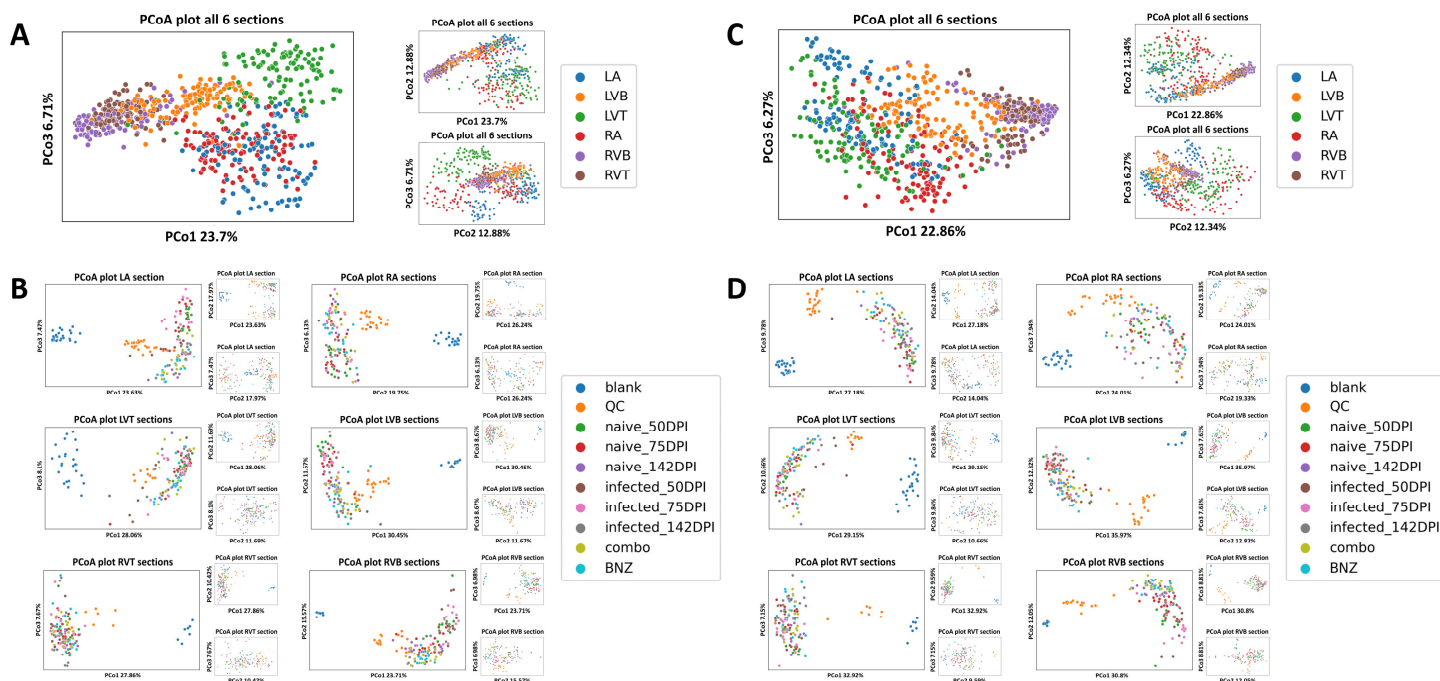

**Supplementary Figure 5. Method evaluation principal coordinate analysis plots (PCoAs).** (A), (B) TIC-normalized data, as implemented throughout this manuscript. (C), (D) Data prior to TIC normalization. (A), (C) Data from all six sampling sites. (B), (D) Data subset by sampling site, including blanks and QCs. RA, right atrium. LA, left atrium. RVT, right ventricle top. RVB, right ventricle bottom. LVT, left ventricle top. LVB, left ventricle bottom. DPI, days post-infection. BNZ, benznidazole. TIC, total ion current. N=15 mice per group and per position. Source data are provided as a Source Data file.

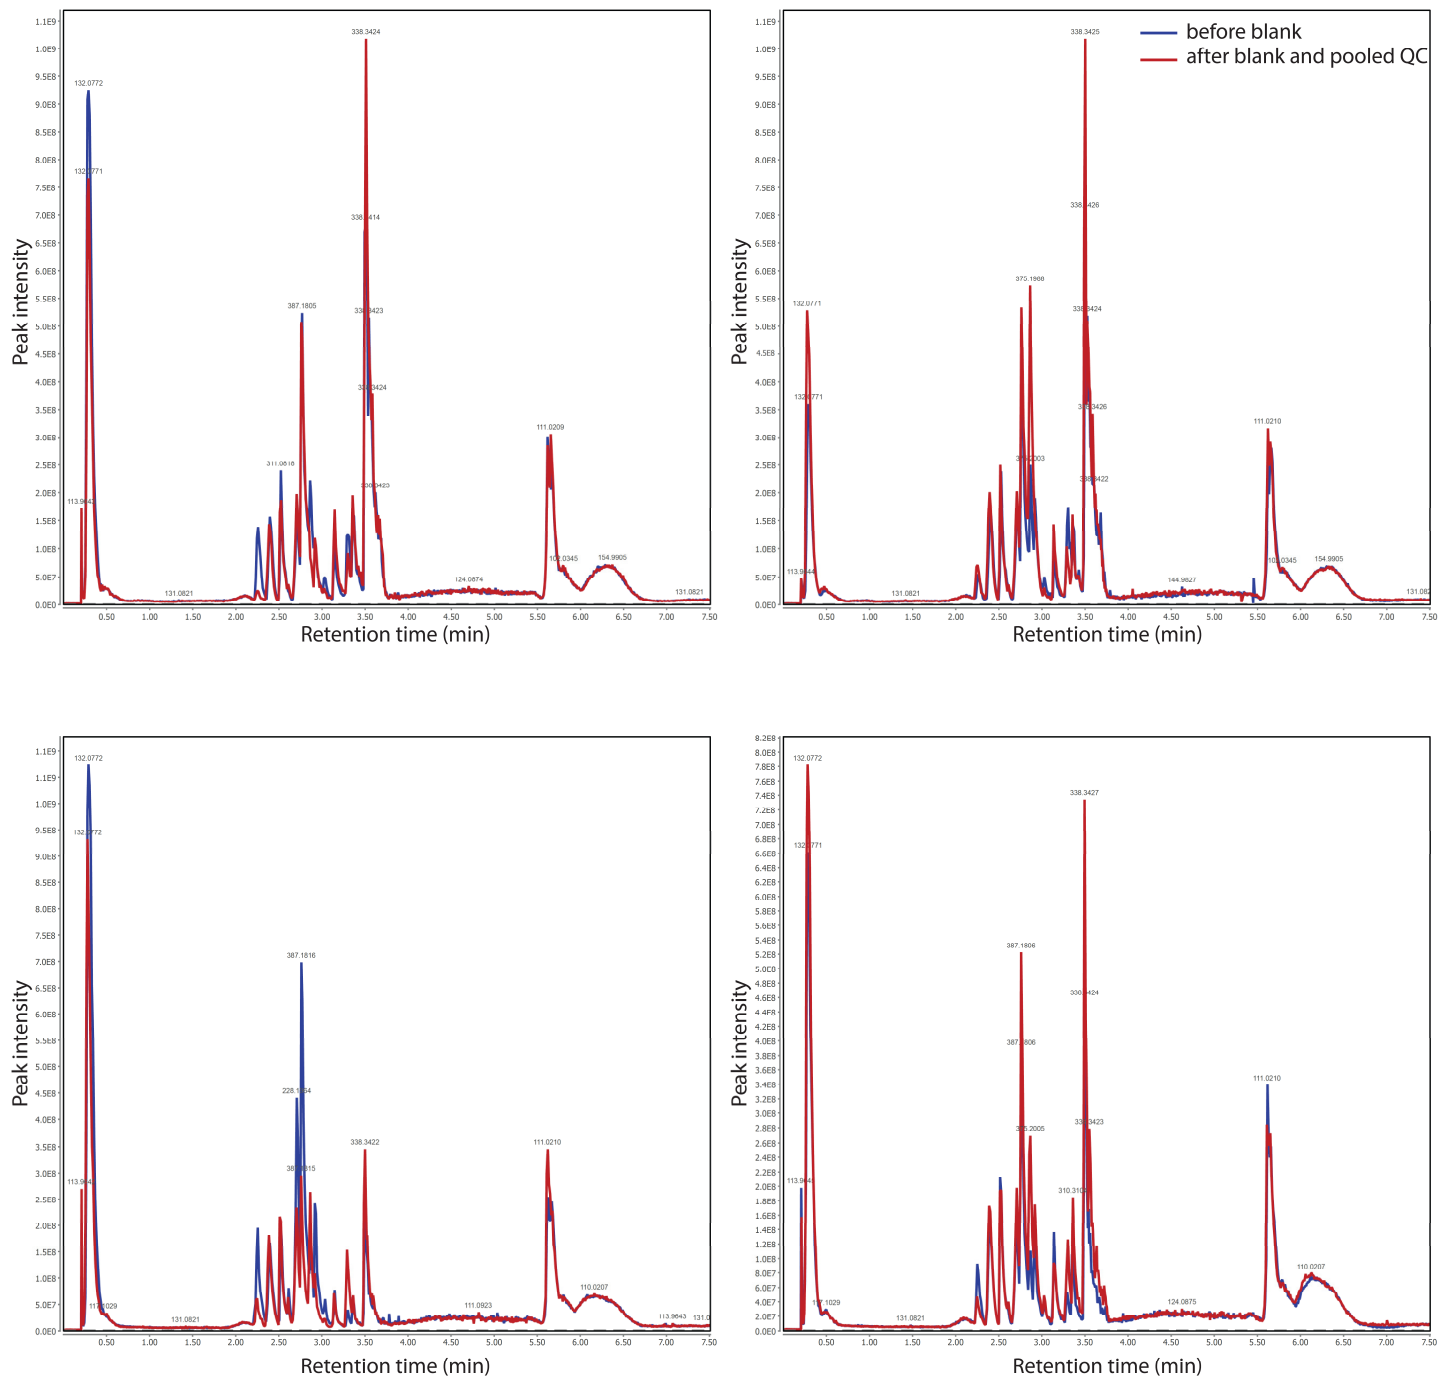

**Supplementary Figure 6. No visible impact of blank injection followed by pooled quality control (QC) on retention time in the subsequent sample.** Representative total ion chromatograms from four different pairs of samples from the right ventricle top, with the first sample immediately prior to a blank and the second sample immediately subsequent to a blank and a pooled QC. Note that different peak intensities and some differences in peak presence/absence are expected, since these are different biological samples, from different experimental groups (since run order was randomized).

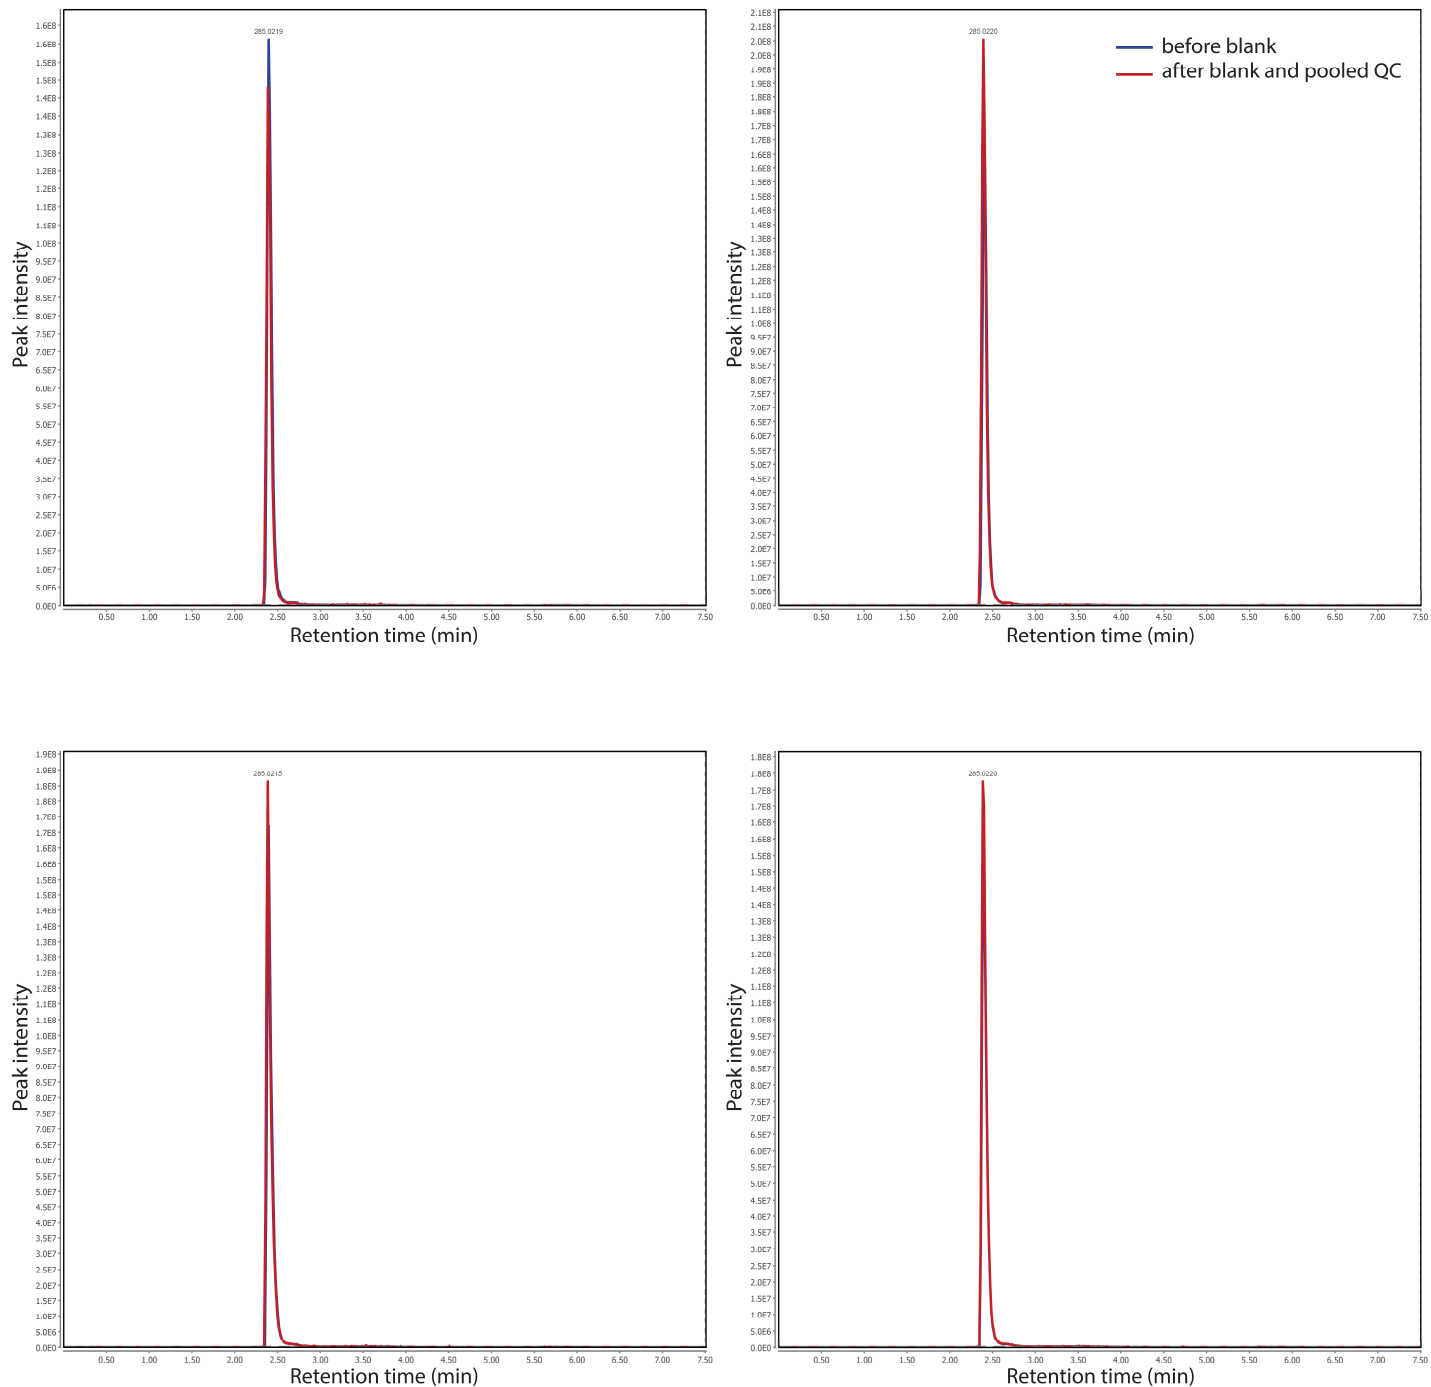

**Supplementary Figure 7. No major impact of blank injection followed by pooled quality control (QC) on peak area and retention time in the subsequent sample (internal standard).** Representative extracted ion chromatogram for the sulfachloropyridazine internal standard, from four different pairs of samples from the right ventricle top, with the first sample immediately prior to a blank and the second sample immediately subsequent to a blank and a pooled QC.

**Supplementary Table 1. Differential metabolic modules by RNA-seq.** LFC, log fold change. BvsU, benznidazole-treated vs uninfected. VvsU, vehicle vs uninfected. LRT, Likelihood ratio test. N=5/group. Likelihood-ratio test to determine if "condition" has an effect on Pathway Module counts. Pairwise Wald tests to determine which condition "levels" contribute to the difference. All tests are two-sided. P-value correction: Benjamini-Hochberg False Discovery Rate (BH FDR). Source data are provided as a Source Data file.

| BNZ vs uninfected |          |          |          |          |           |                                                     |
|-------------------|----------|----------|----------|----------|-----------|-----------------------------------------------------|
| Module            | Pval_LRT | Padj_LRT | BaseMean | LFC_BvsU | Padj_BvsU | Pathway Name                                        |
| M00151            | 2.54E-05 | 0.000174 | 343048.7 | -0.2841  | 0.049671  | Cytochrome bc1 complex respiratory unit             |
| M00152            | 7.67E-05 | 0.00043  | 420893.2 | -0.2705  | 0.04761   | Cytochrome bc1 complex                              |
| M00130            | 0.007058 | 0.017281 | 14230.19 | 0.168485 | 0.024977  | Inositol phosphate metabolism, PI=> PIP2 =>         |
|                   |          |          |          |          |           | Ins(1,4,5)P3 => Ins(1,3,4,5)P4                      |
| M00093            | 0.000884 | 0.002989 | 5576.449 | 0.232356 | 0.019257  | Phosphatidylethanolamine (PE) biosynthesis, PA =>   |
|                   |          |          |          |          |           | PS => PE                                            |
| M00071            | 6.69E-08 | 1.10E-06 | 3097.112 | 0.251196 | 0.020803  | Glycosphingolipid biosynthesis, neolacto-series,    |
|                   |          |          |          |          |           | LacCer => nLc4Cer                                   |
| M00057            | 1.12E-06 | 1.40E-05 | 1848.078 | 0.259915 | 0.024977  | Glycosaminoglycan biosynthesis, linkage             |
|                   |          |          |          |          |           | tetrasaccharide                                     |
| M00100            | 0.000581 | 0.002132 | 1503.144 | 0.286532 | 0.036989  | Sphingosine degradation                             |
| M00074            | 0.003001 | 0.009002 | 5879.333 | 0.288238 | 0.014359  | N-glycan biosynthesis, high-mannose type            |
|                   |          |          |          |          |           | Glycosaminoglycan biosynthesis, chondroitin sulfate |
| M00058            | 4.17E-05 | 0.000261 | 3084.596 | 0.290719 | 0.036333  | backbone                                            |
| M00073            | 0.002019 | 0.006615 | 6354.071 | 0.300851 | 0.011562  | N-glycan precursor trimming                         |
| M00066            | 1.81E-05 | 0.000141 | 1818.825 | 0.304505 | 0.016102  | Lactosylceramide biosynthesis                       |
| M00078            | 0.000131 | 0.000698 | 6998.677 | 0.312085 | 0.016102  | Heparan sulfate degradation                         |
| M00415            | 0.009901 | 0.021519 | 6192.173 | 0.320747 | 0.02387   | Fatty acid elongation in endoplasmic reticulum      |
|                   |          |          |          |          |           | Entner-Doudoroff pathway, glucose-6P =>             |
| M00008            | 0.003168 | 0.009371 | 2665.847 | 0.341653 | 0.036989  | glyceraldehyde-3P + pyruvate                        |
| M00079            | 7.19E-06 | 6.96E-05 | 7297.447 | 0.347735 | 0.016857  | Keratan sulfate degradation                         |
|                   |          |          |          |          |           | Pentose phosphate pathway, oxidative phase,         |
| M00006            | 0.003598 | 0.010357 | 4061.24  | 0.385459 | 0.038108  | glucose 6P => ribulose 5P                           |
| M00176            | 0.005224 | 0.013736 | 1066.067 | 0.418453 | 0.017014  | Assimilatory sulfate reduction, sulfate => H2S      |
| M00616            | 0.005224 | 0.013736 | 1066.067 | 0.418453 | 0.017014  | Sulfate-sulfur assimilation                         |
|                   |          |          |          |          |           | Coenzyme A biosynthesis, archaea, 2-oxoisovalerate  |
| M00914            | 0.007284 | 0.017432 | 436.6947 | 0.486915 | 0.036333  | => 4-phosphopantoate => CoA                         |
| M00958            | 6.31E-10 | 1.92E-08 | 7673.606 | 0.520856 | 1.87E-05  | Adenine ribonucleotide degradation, AMP => Urate    |

|        |          |          |          |          |          |                                                                                                                     |
|--------|----------|----------|----------|----------|----------|---------------------------------------------------------------------------------------------------------------------|
| M00068 | 2.13E-05 | 0.000156 | 308.8995 | 0.538228 | 0.015835 | Glycosphingolipid biosynthesis, globo-series, LacCer<br>=> Gb4Cer                                                   |
| M00959 | 1.20E-10 | 6.39E-09 | 7354.254 | 0.557602 | 2.01E-05 | Guanine ribonucleotide degradation, GMP => Urate                                                                    |
| M00038 | 1.05E-05 | 9.33E-05 | 428.7265 | 0.592959 | 0.014359 | Tryptophan metabolism, tryptophan => kynurenine<br>=> 2-aminomuconate                                               |
| M00844 | 1.10E-08 | 1.95E-07 | 632.1606 | 0.672359 | 0.014879 | Arginine biosynthesis, ornithine => arginine<br>Arginine biosynthesis, glutamate => acetylcitrulline<br>=> arginine |
| M00845 | 1.10E-08 | 1.95E-07 | 632.1606 | 0.672359 | 0.014879 |                                                                                                                     |
| M00546 | 5.11E-12 | 3.63E-10 | 4059.72  | 0.699109 | 2.03E-06 | Purine degradation, xanthine => urea                                                                                |
| M00107 | 1.81E-12 | 3.63E-10 | 105.602  | 0.758362 | 0.001222 | Steroid hormone biosynthesis, cholesterol =><br>pregnenolone => progesterone                                        |
| M00029 | 4.63E-10 | 1.64E-08 | 695.0693 | 0.779278 | 0.009111 | Urea cycle                                                                                                          |
| M00110 | 4.39E-12 | 3.63E-10 | 101.3123 | 0.782244 | 0.001222 | C19/C18-Steroid hormone biosynthesis,<br>pregnenolone => androstenedione => estrone                                 |
| M00045 | 1.39E-05 | 0.000119 | 262.393  | 0.981127 | 0.009413 | Histidine degradation, histidine => N-<br>formiminoglutamate => glutamate                                           |

**vehicle vs uninfected**

| Module | Pval_LRT | Padj_LRT | BaseMean | LFC_VvsU | Padj_VvsU | Pathway Name                                                                                              |
|--------|----------|----------|----------|----------|-----------|-----------------------------------------------------------------------------------------------------------|
| M00017 | 0.003424 | 0.009992 | 4426.346 | -0.78813 | 0.002325  | Methionine biosynthesis, aspartate => homoserine<br>=> methionine                                         |
| M00142 | 4.10E-05 | 0.000261 | 360577.2 | -0.7596  | 4.16E-05  | NADH:ubiquinone oxidoreductase, mitochondria                                                              |
| M00086 | 4.42E-07 | 6.28E-06 | 15716.83 | -0.72498 | 1.32E-06  | beta-Oxidation, acyl-CoA synthesis                                                                        |
| M00565 | 1.07E-06 | 1.40E-05 | 1136.362 | -0.6512  | 4.02E-06  | Trehalose biosynthesis, D-glucose 1P => trehalose                                                         |
| M00154 | 0.000105 | 0.000572 | 2070665  | -0.64991 | 9.75E-05  | Cytochrome c oxidase                                                                                      |
| M00027 | 1.69E-05 | 0.000138 | 2157.459 | -0.58382 | 2.15E-05  | GABA (gamma-Aminobutyrate) shunt                                                                          |
| M00151 | 2.54E-05 | 0.000174 | 343048.7 | -0.58118 | 3.62E-05  | Cytochrome bc1 complex respiratory unit<br>Cobalamin biosynthesis, cobyrinate a,c-diamide =><br>cobalamin |
| M00122 | 3.82E-06 | 4.28E-05 | 784.6708 | -0.56072 | 1.30E-05  |                                                                                                           |
| M00307 | 4.70E-05 | 0.000286 | 50772.69 | -0.55619 | 5.25E-05  | Pyruvate oxidation, pyruvate => acetyl-CoA                                                                |
| M00532 | 5.23E-06 | 5.57E-05 | 16042.09 | -0.53991 | 1.52E-05  | Photorespiration                                                                                          |
| M00036 | 2.75E-05 | 0.000183 | 66517.41 | -0.53984 | 3.09E-05  | Leucine degradation, leucine => acetoacetate +<br>acetyl-CoA                                              |
| M00357 | 0.005189 | 0.013736 | 6108.046 | -0.50562 | 0.003622  | Methanogenesis, acetate => methane                                                                        |
| M00152 | 7.67E-05 | 0.00043  | 420893.2 | -0.50271 | 0.000109  | Cytochrome bc1 complex                                                                                    |
| M00373 | 0.000204 | 0.00101  | 73180.97 | -0.48503 | 0.000196  | Ethylmalonyl pathway                                                                                      |

|        |          |          |          |          |          |                                                                                |
|--------|----------|----------|----------|----------|----------|--------------------------------------------------------------------------------|
| M00375 | 0.000284 | 0.001288 | 65625.56 | -0.47804 | 0.000252 | Hydroxypropionate-hydroxybutylate cycle                                        |
| M00374 | 0.000234 | 0.001108 | 108133.3 | -0.4725  | 0.000215 | Dicarboxylate-hydroxybutyrate cycle                                            |
| M00013 | 1.86E-05 | 0.000141 | 29269.6  | -0.47027 | 3.03E-05 | Malonate semialdehyde pathway, propanoyl-CoA => acetyl-CoA                     |
| M00957 | 0.000239 | 0.001109 | 77288.69 | -0.47001 | 0.000215 | Lysine degradation, bacteria, L-lysine => glutarate => succinate/acetyl-CoA    |
| M00620 | 5.59E-06 | 5.67E-05 | 7714.984 | -0.46995 | 9.85E-06 | Incomplete reductive citrate cycle, acetyl-CoA => oxoglutarate                 |
| M00149 | 0.000827 | 0.00284  | 35765.74 | -0.46531 | 0.000564 | Succinate dehydrogenase, prokaryotes                                           |
| M00849 | 0.000308 | 0.001341 | 66838.57 | -0.46322 | 0.000257 | C5 isoprenoid biosynthesis, mevalonate pathway, archaea                        |
| M00956 | 0.006822 | 0.017053 | 976.6508 | -0.46218 | 0.00444  | Lysine degradation, bacteria, L-lysine => succinate                            |
| M00095 | 0.000302 | 0.001339 | 67295.5  | -0.45944 | 0.000257 | C5 isoprenoid biosynthesis, mevalonate pathway                                 |
| M00087 | 0.000404 | 0.001688 | 179117   | -0.45251 | 0.000334 | beta-Oxidation                                                                 |
| M00085 | 0.000722 | 0.002523 | 93253.46 | -0.45121 | 0.00051  | Fatty acid elongation in mitochondria                                          |
| M00376 | 0.000629 | 0.002233 | 47084.39 | -0.44966 | 0.000452 | 3-Hydroxypropionate bi-cycle                                                   |
| M00088 | 0.000454 | 0.001825 | 72125.04 | -0.44239 | 0.000361 | Ketone body biosynthesis, acetyl-CoA => acetoacetate/3-hydroxybutyrate/acetone |
| M00032 | 0.00045  | 0.001825 | 62833.11 | -0.43733 | 0.000361 | Lysine degradation, lysine => saccharopine => acetoacetyl-CoA                  |
| M00613 | 0.000484 | 0.00184  | 51732.22 | -0.43693 | 0.00037  | Anoxygenic photosynthesis in green nonsulfur bacteria                          |
| M00155 | 0.041833 | 0.070161 | 355227.8 | -0.42837 | 0.024487 | Cytochrome c oxidase, prokaryotes                                              |
| M00011 | 0.002882 | 0.008898 | 134490.6 | -0.42263 | 0.002    | Citrate cycle, second carbon oxidation, 2-oxoglutarate => oxaloacetate         |
| M00855 | 0.007278 | 0.017432 | 51144.04 | -0.4157  | 0.0048   | Glycogen degradation, glycogen => glucose-6P                                   |
| M00878 | 0.000477 | 0.00184  | 10512.96 | -0.39524 | 0.00037  | Phenylacetate degradation, phenylacetate => acetyl-CoA/succinyl-CoA            |
| M00741 | 8.27E-06 | 7.66E-05 | 8528.39  | -0.39186 | 1.56E-05 | Propanoyl-CoA metabolism, propanoyl-CoA => succinyl-CoA                        |
| M00158 | 0.002672 | 0.008369 | 404747.4 | -0.38986 | 0.002088 | F-type ATPase, eukaryotes                                                      |
| M00148 | 0.002967 | 0.009002 | 55343.39 | -0.37889 | 0.002088 | Succinate dehydrogenase (ubiquinone)                                           |
| M00009 | 0.004753 | 0.013097 | 214482.4 | -0.37657 | 0.0032   | Citrate cycle (TCA cycle, Krebs cycle)                                         |
| M00168 | 0.003797 | 0.010783 | 21085.14 | -0.37366 | 0.002788 | CAM (Crassulacean acid metabolism), dark                                       |
| M00171 | 0.017188 | 0.032983 | 56061.23 | -0.34656 | 0.012581 | C4-dicarboxylic acid cycle, NAD - malic enzyme type                            |

|        |          |          |          |          |          |                                                                                                                             |
|--------|----------|----------|----------|----------|----------|-----------------------------------------------------------------------------------------------------------------------------|
| M00173 | 0.006345 | 0.01609  | 84582.24 | -0.33112 | 0.004499 | Reductive citrate cycle (Arnon-Buchanan cycle)                                                                              |
| M00614 | 0.006345 | 0.01609  | 84582.24 | -0.33112 | 0.004499 | Anoxygenic photosynthesis in green sulfur bacteria<br>C4-dicarboxylic acid cycle, phosphoenolpyruvate<br>carboxykinase type |
| M00170 | 0.039848 | 0.067362 | 33350.04 | -0.32269 | 0.032146 | Glyoxylate cycle                                                                                                            |
| M00012 | 0.012425 | 0.026204 | 49105.71 | -0.32132 | 0.007706 | Citrate cycle, first carbon oxidation, oxaloacetate =><br>2-oxoglutarate                                                    |
| M00010 | 0.011894 | 0.025335 | 79991.85 | -0.32099 | 0.007706 | F-type ATPase, prokaryotes and chloroplasts                                                                                 |
| M00157 | 0.015044 | 0.029947 | 193456.8 | -0.32052 | 0.009566 | NAD biosynthesis, aspartate => quinolinate => NAD                                                                           |
| M00115 | 0.013229 | 0.027625 | 852.1475 | -0.30661 | 0.009306 | Formaldehyde assimilation, xylulose<br>monophosphate pathway                                                                |
| M00344 | 0.058319 | 0.090671 | 440.5014 | -0.26699 | 0.03779  | beta-Oxidation, peroxisome,<br>tri/dihydroxycholestanoyl-CoA =><br>choloyl/chenodeoxycholoyl-CoA                            |
| M00862 | 0.000329 | 0.001401 | 8487.699 | -0.25889 | 0.000475 | CAM (Crassulacean acid metabolism), light<br>C4-dicarboxylic acid cycle, NADP - malic enzyme<br>type                        |
| M00169 | 0.000152 | 0.000771 | 4647.983 | -0.25566 | 0.000452 | beta-Oxidation, peroxisome, VLCFA                                                                                           |
| M00172 | 0.000152 | 0.000771 | 4647.983 | -0.25566 | 0.000452 | Jasmonic acid biosynthesis                                                                                                  |
| M00861 | 0.00054  | 0.002019 | 16760.82 | -0.25109 | 0.00051  | Ubiquinone biosynthesis, eukaryotes, 4-<br>hydroxybenzoate + polyprenyl-PP => ubiquinol                                     |
| M00113 | 0.007844 | 0.017796 | 8278.844 | -0.23412 | 0.005009 | Riboflavin biosynthesis, fungi, GTP =>                                                                                      |
| M00128 | 0.042233 | 0.070279 | 8925.9   | -0.22763 | 0.026779 | riboflavin/FMN/FAD                                                                                                          |
| M00911 | 0.016821 | 0.032714 | 2823.479 | -0.20048 | 0.010134 | O-glycan biosynthesis, mannose type (core M3)                                                                               |
| M00872 | 0.014632 | 0.029402 | 6821.147 | -0.19471 | 0.024552 | Triacylglycerol biosynthesis                                                                                                |
| M00089 | 0.000626 | 0.002233 | 27332.49 | -0.18615 | 0.021773 | Molybdenum cofactor biosynthesis, GTP =><br>molybdenum cofactor                                                             |
| M00880 | 0.007634 | 0.017675 | 1713.007 | -0.18568 | 0.018072 | Fatty acid biosynthesis in mitochondria, fungi                                                                              |
| M00874 | 0.070889 | 0.10559  | 20704.09 | -0.17085 | 0.044104 | Bile acid biosynthesis, cholesterol =><br>cholate/chenodeoxycholate                                                         |
| M00104 | 0.020877 | 0.039006 | 10716.84 | -0.14938 | 0.026657 | Heme biosynthesis, bacteria, glutamyl-tRNA =><br>coproporphyrin III => heme                                                 |
| M00926 | 0.044461 | 0.072848 | 7594.657 | -0.14096 | 0.032105 | Inositol phosphate metabolism, PI=> PIP2 =>                                                                                 |
| M00130 | 0.007058 | 0.017281 | 14230.19 | 0.151828 | 0.033525 | Ins(1,4,5)P3 => Ins(1,3,4,5)P4                                                                                              |
| M00055 | 0.016894 | 0.032714 | 4017.397 | 0.194025 | 0.012589 | N-glycan precursor biosynthesis                                                                                             |

|        |          |          |          |          |          |                                                                             |
|--------|----------|----------|----------|----------|----------|-----------------------------------------------------------------------------|
| M00167 | 0.007522 | 0.017606 | 60411.55 | 0.253727 | 0.026931 | Reductive pentose phosphate cycle, glyceraldehyde-3P => ribulose-5P         |
| M00892 | 0.005603 | 0.014555 | 29193.78 | 0.268445 | 0.005122 | UDP-N-acetyl-D-glucosamine biosynthesis, eukaryotes, glucose => UDP-GlcNAc  |
| M00093 | 0.000884 | 0.002989 | 5576.449 | 0.271454 | 0.002088 | Phosphatidylethanolamine (PE) biosynthesis, PA => PS => PE                  |
| M00098 | 0.020337 | 0.038676 | 16846.69 | 0.271752 | 0.012378 | Acylglycerol degradation                                                    |
| M00909 | 0.003849 | 0.010787 | 14901.34 | 0.279449 | 0.004668 | UDP-N-acetyl-D-glucosamine biosynthesis, prokaryotes, glucose => UDP-GlcNAc |
| M00554 | 0.061861 | 0.094794 | 797.8422 | 0.301364 | 0.034836 | Nucleotide sugar biosynthesis, galactose => UDP-galactose                   |
| M00176 | 0.005224 | 0.013736 | 1066.067 | 0.316188 | 0.041579 | Assimilatory sulfate reduction, sulfate => H2S                              |
| M00616 | 0.005224 | 0.013736 | 1066.067 | 0.316188 | 0.041579 | Sulfate-sulfur assimilation                                                 |
| M00099 | 0.007408 | 0.017532 | 7733.662 | 0.316587 | 0.007225 | Sphingosine biosynthesis                                                    |
| M00076 | 0.007854 | 0.017796 | 3800.295 | 0.317158 | 0.007181 | Dermatan sulfate degradation                                                |
| M00101 | 0.029578 | 0.050808 | 3086.969 | 0.327782 | 0.024743 | Cholesterol biosynthesis, squalene 2,3-epoxide => cholesterol               |
| M00004 | 0.024584 | 0.043275 | 22759.38 | 0.33168  | 0.015904 | Pentose phosphate pathway (Pentose phosphate cycle)                         |
| M00133 | 0.004796 | 0.013097 | 822.2516 | 0.333359 | 0.003321 | Polyamine biosynthesis, arginine => agmatine => putrescine => spermidine    |
| M00134 | 0.006885 | 0.017053 | 3354.433 | 0.371101 | 0.005442 | Polyamine biosynthesis, arginine => ornithine => putrescine                 |
| M00917 | 0.01105  | 0.023773 | 2470.922 | 0.372832 | 0.008401 | Phytosterol biosynthesis, squalene 2,3-epoxide => campesterol/sitosterol    |
| M00094 | 0.002154 | 0.00695  | 5484.512 | 0.395231 | 0.00181  | Ceramide biosynthesis                                                       |
| M00124 | 0.023939 | 0.042491 | 530.0559 | 0.410197 | 0.019188 | Pyridoxal-P biosynthesis, erythrose-4P => pyridoxal-P                       |
| M00078 | 0.000131 | 0.000698 | 6998.677 | 0.410717 | 0.000252 | Heparan sulfate degradation                                                 |
| M00160 | 3.62E-06 | 4.28E-05 | 30976.7  | 0.436716 | 1.56E-05 | V-type ATPase, eukaryotes                                                   |
| M00008 | 0.003168 | 0.009371 | 2665.847 | 0.439566 | 0.004668 | Entner-Doudoroff pathway, glucose-6P => glyceraldehyde-3P + pyruvate        |
| M00100 | 0.000581 | 0.002132 | 1503.144 | 0.44016  | 0.000608 | Sphingosine degradation                                                     |
| M00366 | 0.016347 | 0.032239 | 735.0158 | 0.441401 | 0.009566 | C10-C20 isoprenoid biosynthesis, plants                                     |
| M00077 | 0.001581 | 0.005262 | 2704.23  | 0.445693 | 0.001341 | Chondroitin sulfate degradation                                             |
| M00072 | 7.28E-05 | 0.000419 | 12138.59 | 0.471691 | 7.25E-05 | N-glycosylation by oligosaccharyltransferase                                |

|        |          |          |          |          |          |                                                                                 |
|--------|----------|----------|----------|----------|----------|---------------------------------------------------------------------------------|
| M00014 | 0.002307 | 0.007334 | 19370.84 | 0.475614 | 0.001651 | Glucuronate pathway (uronate pathway)                                           |
| M00066 | 1.81E-05 | 0.000141 | 1818.825 | 0.478066 | 3.09E-05 | Lactosylceramide biosynthesis                                                   |
| M00006 | 0.003598 | 0.010357 | 4061.24  | 0.497236 | 0.004976 | Pentose phosphate pathway, oxidative phase, glucose 6P => ribulose 5P           |
| M00103 | 0.038968 | 0.066401 | 4.905227 | 0.500321 | 0.027063 | Cholecalciferol biosynthesis                                                    |
| M00129 | 2.62E-07 | 3.99E-06 | 18186.38 | 0.510115 | 1.92E-06 | Ascorbate biosynthesis, animals, glucose-1P => ascorbate                        |
| M00057 | 1.12E-06 | 1.40E-05 | 1848.078 | 0.518723 | 2.09E-06 | Glycosaminoglycan biosynthesis, linkage tetrasaccharide                         |
| M00914 | 0.007284 | 0.017432 | 436.6947 | 0.52366  | 0.014243 | Coenzyme A biosynthesis, archaea, 2-oxoisovalerate => 4-phosphopantoate => CoA  |
| M00071 | 6.69E-08 | 1.10E-06 | 3097.112 | 0.526583 | 1.36E-07 | Glycosphingolipid biosynthesis, neolacto-series, LacCer => nLc4Cer              |
| M00058 | 4.17E-05 | 0.000261 | 3084.596 | 0.532032 | 4.85E-05 | Glycosaminoglycan biosynthesis, chondroitin sulfate backbone                    |
| M00015 | 0.000482 | 0.00184  | 1020.656 | 0.547406 | 0.000424 | Proline biosynthesis, glutamate => proline                                      |
| M00079 | 7.19E-06 | 6.96E-05 | 7297.447 | 0.588285 | 1.35E-05 | Keratan sulfate degradation                                                     |
| M00042 | 2.43E-05 | 0.000173 | 494.2671 | 0.593166 | 0.000285 | Catecholamine biosynthesis, tyrosine => dopamine => noradrenaline => adrenaline |
| M00020 | 0.022158 | 0.040339 | 621.2222 | 0.59684  | 0.014322 | Serine biosynthesis, glycerate-3P => serine                                     |
| M00580 | 0.000229 | 0.001108 | 505.7957 | 0.634739 | 0.000215 | Pentose phosphate pathway, archaea, fructose 6P => ribose 5P                    |
| M00958 | 6.31E-10 | 1.92E-08 | 7673.606 | 0.654272 | 1.70E-08 | Adenine ribonucleotide degradation, AMP => Urate                                |
| M00091 | 0.020701 | 0.039006 | 34.93345 | 0.733937 | 0.012412 | Phosphatidylcholine (PC) biosynthesis, PE => PC                                 |
| M00959 | 1.20E-10 | 6.39E-09 | 7354.254 | 0.74196  | 1.79E-09 | Guanine ribonucleotide degradation, GMP => Urate                                |
| M00046 | 6.11E-09 | 1.44E-07 | 3493.121 | 0.782719 | 2.64E-08 | Pyrimidine degradation, uracil => beta-alanine, thymine => 3-aminoisobutanoate  |
| M00068 | 2.13E-05 | 0.000156 | 308.8995 | 0.859321 | 3.09E-05 | Glycosphingolipid biosynthesis, globo-series, LacCer => Gb4Cer                  |
| M00546 | 5.11E-12 | 3.63E-10 | 4059.72  | 0.875456 | 2.05E-10 | Purine degradation, xanthine => urea                                            |
| M00038 | 1.05E-05 | 9.33E-05 | 428.7265 | 0.94483  | 1.56E-05 | Tryptophan metabolism, tryptophan => kynurenine => 2-aminomuconate              |
| M00039 | 4.96E-05 | 0.000294 | 210.8957 | 0.973986 | 6.62E-05 | Monolignol biosynthesis, phenylalanine/tyrosine => monolignol                   |
| M00045 | 1.39E-05 | 0.000119 | 262.393  | 1.435492 | 1.56E-05 | Histidine degradation, histidine => N-formiminoglutamate => glutamate           |

|        |          |          |          |          |          |                                                                                                             |
|--------|----------|----------|----------|----------|----------|-------------------------------------------------------------------------------------------------------------|
| M00107 | 1.81E-12 | 3.63E-10 | 105.602  | 1.449917 | 3.15E-11 | Steroid hormone biosynthesis, cholesterol => pregnenolone => progesterone                                   |
| M00110 | 4.39E-12 | 3.63E-10 | 101.3123 | 1.46651  | 3.74E-11 | C19/C18-Steroid hormone biosynthesis, pregnenolone => androstenedione => estrone                            |
| M00844 | 1.10E-08 | 1.95E-07 | 632.1606 | 1.475239 | 1.80E-08 | Arginine biosynthesis, ornithine => arginine                                                                |
| M00845 | 1.10E-08 | 1.95E-07 | 632.1606 | 1.475239 | 1.80E-08 | Arginine biosynthesis, glutamate => acetylcitrulline => arginine                                            |
| M00037 | 4.99E-09 | 1.33E-07 | 243.8195 | 1.542745 | 2.64E-08 | Melatonin biosynthesis, animals, tryptophan => serotonin => melatonin                                       |
| M00936 | 6.77E-09 | 1.44E-07 | 236.5474 | 1.569541 | 3.24E-08 | Melatonin biosynthesis, plants, tryptophan => serotonin => melatonin                                        |
| M00029 | 4.63E-10 | 1.64E-08 | 695.0693 | 1.630909 | 1.23E-09 | Urea cycle                                                                                                  |
| M00968 | 1.65E-10 | 7.05E-09 | 216.344  | 1.656426 | 6.25E-09 | Pentose bisphosphate pathway (nucleoside degradation), archaea, nucleoside/NMP => 3-PGA/glycerone phosphate |

---

**Supplementary Table 2. Disease parameters median values and interquartile range (supporting data in Table 1).** IQR, interquartile range. N=15 mice per group. Source data are provided as a Source Data file.

| <b>Disease metadata</b>                              | <b>naive_median</b> | <b>naive_IQR</b> | <b>infected_median</b> | <b>infected_IQR</b> | <b>combo_median</b> | <b>combo_IQR</b> | <b>BNZ_median</b> | <b>BNZ_IQR</b> |
|------------------------------------------------------|---------------------|------------------|------------------------|---------------------|---------------------|------------------|-------------------|----------------|
| Body Weight                                          | 25.2                | 1.6              | 24.3                   | 1.95                | 23.4                | 1                | 23.6              | 1.2            |
| CD3+CD8+IFNg+                                        | 0.0046              | 0.00265          | 0.0013                 | 0.005               | 0.003               | 0.01035          | 0.0005            | 0.0046         |
| CD3+CD8+IL-2+                                        | 0.0132              | 0.02215          | 0.002                  | 0.01505             | 0.0064              | 0.04385          | 0.0017            | 0.00535        |
| CD3+CD8+TNFa+                                        | 0.0055              | 0.00675          | 0.0011                 | 0.0073              | 0.0016              | 0.0278           | 0.0001            | 0.00725        |
| Left Ventricular End Systolic Diameter (millimeters) | 2.445012            | 0.388272         | 2.214906               | 0.36785             | 2.387004            | 0.449023         | 2.666671          | 0.581516       |
| Heart Rate                                           | 446.4478            | 45.92878         | 405.7345               | 50.72885            | 414.4822            | 29.55705         | 404.8384          | 46.08246       |
| Liver Weight/Body Weight                             | 0.053913            | 0.003541         | 0.058228               | 0.002806            | 0.0575              | 0.003424         | 0.056054          | 0.002942       |
| Left Ventricular Anterior Wall, systole (mm)         | 1.531194            | 0.245886         | 1.701612               | 0.171231            | 1.64556             | 0.332623         | 1.424525          | 0.158953       |
| P Amplitude (V)                                      | 0.1537              | 0.0713           | 0.106                  | 0.03427             | 0.08632             | 0.0509           | 0.1015            | 0.041125       |
| P Duration (s)                                       | 0.01358             | 0.00235          | 0.0143                 | 0.00288             | 0.01369             | 0.002045         | 0.01446           | 0.001915       |
| QT Interval (s)                                      | 0.01703             | 0.00083          | 0.01858                | 0.00288             | 0.01781             | 0.00214          | 0.01806           | 0.00217        |
| QTc (s)                                              | 0.0451              | 0.002665         | 0.04886                | 0.00591             | 0.04526             | 0.006045         | 0.04721           | 0.00604        |
| R Amplitude (V)                                      | 1.357               | 0.265            | 0.9077                 | 0.2713              | 1.075               | 0.3218           | 1.267             | 0.376          |
| RR Interval (s)                                      | 0.1392              | 0.0128           | 0.1503                 | 0.01055             | 0.1467              | 0.0064           | 0.1464            | 0.0104         |
| T Amplitude (V)                                      | 0.3877              | 0.13595          | 0.3667                 | 0.1382              | 0.3427              | 0.1629           | 0.4178            | 0.11305        |
| End Systolic Volume (microliters)                    | 21.11943            | 8.729488         | 16.5908                | 6.67166             | 19.89002            | 8.856307         | 26.19963          | 14.92633       |

**Supplementary Table 3. Proportion of small molecules for each treatment response behavior that were significantly perturbed at early chronic stage timepoints.** RA, right atrium. LA, left atrium. RVT, right ventricle top. RVB, right ventricle bottom. LVT, left ventricle top. LVB, left ventricle bottom. DPI, days post-infection. BNZ, benznidazole. N=15 mice per group and per position. Source data are provided as a Source Data file.

| Timepoint | Sections | Restored by any treatment | Restored by BNZ+Tc24 combination                    | Restored by BNZ-only treatment | Restored by both treatments | Not restored                                  |
|-----------|----------|---------------------------|-----------------------------------------------------|--------------------------------|-----------------------------|-----------------------------------------------|
| 50 DPI    | LA       | 0.42                      | 1                                                   | 0.33                           | 0.38                        | 0.84                                          |
|           | RA       | 0.1                       | No small molecules restored by BNZ+Tc24 combination | 0                              | 0.11                        | No small molecules that failed to be restored |
|           | LVT      | 0.6                       | 0.71                                                | 0.5                            | 0.43                        | 0                                             |
|           | LVB      | 0.76                      | 0.73                                                | 0.83                           | 0.75                        | 0.72                                          |
|           | RVT      | 0.48                      | 0.5                                                 | 0                              | 0.5                         | 0.31                                          |
|           | RVB      | 0.07                      | 0                                                   | 0.25                           | 0                           | 0.03                                          |
| 75 DPI    | LA       | 0                         | 0                                                   | 0                              | 0                           | 0                                             |
|           | RA       | 0.1                       | No small molecules restored by BNZ+Tc24 combination | 0.33                           | 0.07                        | No small molecules that failed to be restored |
|           | LVT      | 0.12                      | 0                                                   | 0.5                            | 0.14                        | 0                                             |
|           | LVB      | 0.28                      | 0.07                                                | 0.83                           | 0.25                        | 0.62                                          |
|           | RVT      | 0.16                      | 0.12                                                | 0                              | 0.18                        | 0.28                                          |
|           | RVB      | 0.14                      | 0                                                   | 0.38                           | 0.14                        | 0.09                                          |

**Supplementary Table 4. Instrumental and LC-MS data processing methods.** AGC, automatic gain control. IT, ion injection time. (N)CE, (normalized) collision energy.

| Thermo Scientific Vanquish UHPLC system parameters               |                        |                               |
|------------------------------------------------------------------|------------------------|-------------------------------|
| Time (min)                                                       | Flow (mL/min)          | %A (Water + 0.1% Formic Acid) |
| 0.00                                                             | 0.500                  | 98                            |
| 1.00                                                             | 0.500                  | 98                            |
| 2.50                                                             | 0.500                  | 2                             |
| 4.50                                                             | 0.500                  | 2                             |
| 5.50                                                             | 0.500                  | 98                            |
| 7.50                                                             | 0.500                  | 98                            |
| 7.50                                                             | Stop Run               |                               |
| Divert valve parameters                                          |                        |                               |
| Switch at                                                        | 0.2 min                |                               |
| Q Exactive Plus (Thermo Scientific) mass spectrometer parameters |                        |                               |
| Source                                                           |                        |                               |
| Sheath Gas Flow Rate                                             | 35                     |                               |
| Aux Gas Flow Rate                                                | 10                     |                               |
| Sweep Gas Flow Rate                                              | 0                      |                               |
| Spray Voltage                                                    | 3.80 (+)               |                               |
| Capillary                                                        | 320°C                  |                               |
| Temperature                                                      |                        |                               |
| S-lens RF Level                                                  | 50.0                   |                               |
| Aux Gas Heater                                                   | 350.0°C                |                               |
| Temperature                                                      |                        |                               |
| Full MS                                                          |                        |                               |
| Resolution                                                       | 70,000                 |                               |
| AGC Target                                                       | 3.0E6                  |                               |
| Maximum IT                                                       | 246 milliseconds       |                               |
| Scan Range                                                       | 100 to 1500 <i>m/z</i> |                               |
| dd-MS <sup>2</sup>                                               |                        |                               |
| Resolution                                                       | 17,500                 |                               |
| AGC Target                                                       | 1.0E5                  |                               |
| Maximum IT                                                       | 54 milliseconds        |                               |
| Top N                                                            | 5                      |                               |
| Isolation Window                                                 | 1.0 <i>m/z</i>         |                               |
| Fixed First Mass                                                 | ---                    |                               |
| (N)CE/ Stepped                                                   | NCE: 20, 40, 60        |                               |
| dd Settings                                                      |                        |                               |
| Min. AGC Target                                                  | 8.00E3                 |                               |
| Intensity Threshold                                              | 1.50E5                 |                               |
| Apex Trigger                                                     | ---                    |                               |
| Charge Exclusion                                                 | ---                    |                               |
| Peptide Match                                                    | preferred              |                               |
| Exclude Isotope                                                  | On                     |                               |
| Dynamic Exclusion                                                | 10.0 seconds           |                               |
| MZmine version 2.53 parameters                                   |                        |                               |
| Polarity: Positive                                               |                        |                               |

|                               |                                                        |                         |
|-------------------------------|--------------------------------------------------------|-------------------------|
| MS <sup>1</sup>               | Noise Level                                            | 9.0E5                   |
| MS <sup>2</sup>               | Noise Level                                            | 1.0E3                   |
| Chromatogram<br>Builder       | Mass List                                              | masses                  |
|                               | Minimum Time Span (min)                                | 0.01                    |
|                               | Minimum Height                                         | 9.0E5                   |
|                               | <i>m/z</i> Tolerance (ppm)                             | 10.0                    |
| Chromatogram<br>Deconvolution | Algorithm                                              | Local minimum<br>search |
|                               | <i>m/z</i> Range for MS <sup>2</sup> Scan Pairing (Da) | 0.01                    |
|                               | RT Range for MS <sup>2</sup> Scan Pairing (min)        | 0.2                     |
|                               | Chromatographic Threshold                              | 20%                     |
|                               | Search Minimum in RT range                             | 0.03                    |
|                               | Minimum Relative Height                                | 26%                     |
|                               | Minimum Absolute Height                                | 1.0E4                   |
|                               | Minimum ratio of peak top/edge                         | 1                       |
|                               | Peak Duration range (min)                              | 0.01-1.00               |
| Deisotoping                   | <i>m/z</i> Tolerance (ppm)                             | 10.0                    |
|                               | Retention Time Tolerance (min)                         | 0.5                     |
|                               | Monotonic Shape                                        | Checked                 |
|                               | Maximum Charge                                         | 3                       |
|                               | Representative Isotope                                 | Lowest <i>m/z</i>       |
| Alignment                     | <i>m/z</i> Tolerance (ppm)                             | 10.0                    |
|                               | Weight for <i>m/z</i>                                  | 1                       |
|                               | Weight for Retention Time                              | 1                       |
|                               | Retention Time Tolerance (min)                         | 0.5                     |
| Row Filtering                 | Minimum Peaks in a Row                                 | 3                       |
|                               | Retention Time (min)                                   | 0.3-7                   |
|                               | Keeps Only Peaks with MS <sup>2</sup> Scans            | Checked                 |
|                               | Reset Peak No. ID                                      | Checked                 |

**Supplementary Table 5. Distance analysis between naïve and infected at 50, 75, and 142 days post infection (DPI).** LA, left atrium. RA, right atrium. LVT, left ventricle top. LVB, left ventricle bottom. RVT, right ventricle top. RVB, right ventricle bottom. N=15 mice per group and per position. Source data are provided as a Source Data file.

| Heart section | DPI | pseudo-F | p-value |
|---------------|-----|----------|---------|
| LA            | 50  | 3.029144 | 0.014   |
|               | 70  | 2.330901 | 0.023   |
|               | 142 | 1.09537  | 0.321   |
| RA            | 50  | 1.578709 | 0.12    |
|               | 70  | 2.910362 | 0.013   |
|               | 142 | 2.511789 | 0.039   |
| LVT           | 50  | 3.652951 | 0.005   |
|               | 70  | 1.460853 | 0.143   |
|               | 142 | 1.187019 | 0.282   |
| LVB           | 50  | 5.163818 | 0.003   |
|               | 70  | 3.503573 | 0.002   |
|               | 142 | 4.459738 | 0.001   |
| RVT           | 50  | 2.060866 | 0.009   |
|               | 70  | 4.613933 | 0.001   |
|               | 142 | 3.914494 | 0.001   |
| RVB           | 50  | 1.45523  | 0.139   |
|               | 70  | 4.282155 | 0.001   |
|               | 142 | 5.425939 | 0.001   |

**Supplementary Table 6. Kruskal-Wallis with FDR-corrected post-hoc Dunn's test for distances between naïve and infected at 50, 75, and 142 days post infection (DPI).** LA, left atrium. RA, right atrium. LVT, left ventricle top. LVB, left ventricle bottom. RVT, right ventricle top. RVB, right ventricle bottom. FDR, false discovery rate. Data represents every possible pairwise combinations between N=15 mice per group and per position. Source data are provided as a Source Data file.

| Heart section | Pair 1                  | Pair 2                   | FDR-corrected P value |
|---------------|-------------------------|--------------------------|-----------------------|
| LA            | naïve_VS_infected_50DPI | naïve_VS_infected_75DPI  | 3.327069e-01          |
|               | naïve_VS_infected_50DPI | naïve_VS_infected_142DPI | 2.678613e-18          |
|               | naïve_VS_infected_75DPI | naïve_VS_infected_142DPI | 6.183185e-22          |
| RA            | naïve_VS_infected_50DPI | naïve_VS_infected_75DPI  | 0.7474485             |
|               | naïve_VS_infected_50DPI | naïve_VS_infected_142DPI | 0.7727821             |
|               | naïve_VS_infected_75DPI | naïve_VS_infected_142DPI | 0.6268322             |
| LVT           | naïve_VS_infected_50DPI | naïve_VS_infected_75DPI  | 0.007282892           |
|               | naïve_VS_infected_50DPI | naïve_VS_infected_142DPI | 0.092750387           |
|               | naïve_VS_infected_75DPI | naïve_VS_infected_142DPI | 0.244127579           |
| LVB           | naïve_VS_infected_50DPI | naïve_VS_infected_75DPI  | 2.233079e-09          |
|               | naïve_VS_infected_50DPI | naïve_VS_infected_142DPI | 9.915717e-17          |
|               | naïve_VS_infected_75DPI | naïve_VS_infected_142DPI | 1.686405e-02          |
| RVT           | naïve_VS_infected_50DPI | naïve_VS_infected_75DPI  | 0.05464850            |
|               | naïve_VS_infected_50DPI | naïve_VS_infected_142DPI | 0.40073528            |
|               | naïve_VS_infected_75DPI | naïve_VS_infected_142DPI | 0.01009132            |
| RVB           | naïve_VS_infected_50DPI | naïve_VS_infected_75DPI  | 0.2803490             |
|               | naïve_VS_infected_50DPI | naïve_VS_infected_142DPI | 0.1506789             |
|               | naïve_VS_infected_75DPI | naïve_VS_infected_142DPI | 0.9722301             |

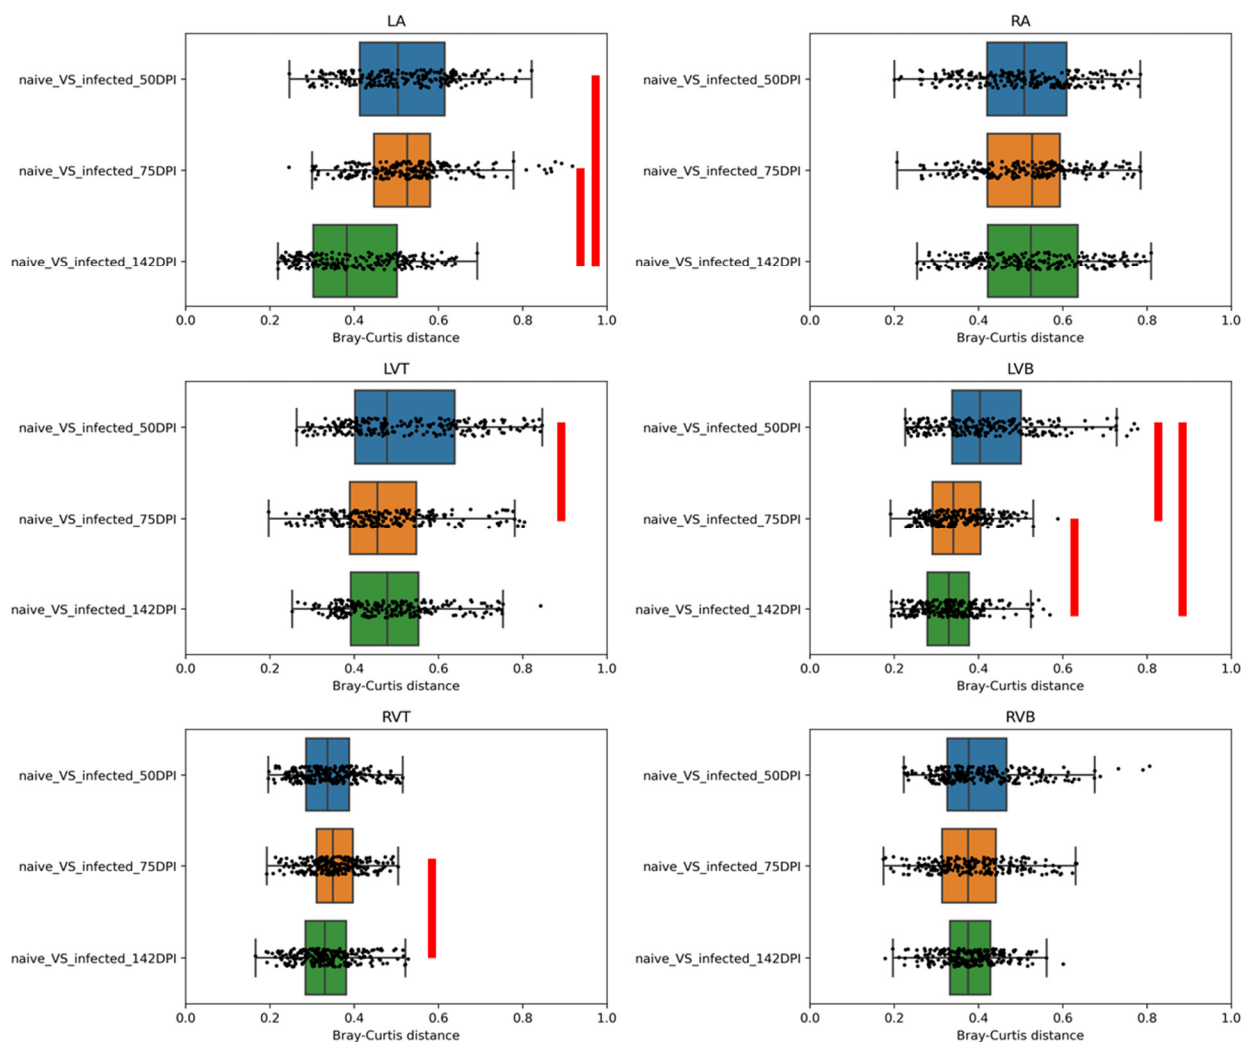

**Supplementary Figure 8. Distance analysis boxplot between naïve and infected at 50, 75, and 142 days post infection (DPI).** Each data point is the Bray-Curtis distance in terms of overall small molecule composition between every pair of samples. For example, in the boxplot marked naïve\_vs\_infected\_50DPI, this would be the distance between every naïve sample and every infected sample, at 50 DPI, in all possible permutations. N=15 mice per group and per position. Boxplots represent median, upper and lower quartiles, with whiskers extending to show the rest of the distribution, except for points that are determined to be outliers by being beyond the interquartile range  $\pm 1.5$  times the interquartile range. Red line, p-value < 0.05 by Mann-Whitney U Test, two-sided, FDR-corrected. Exact p-values are in Supplementary Table 6. LA, left atrium. RA, right atrium. LVT, left ventricle top. LVB, left ventricle bottom. RVT, right ventricle top. RVB, right ventricle bottom. Source data are provided as a Source Data file.

**Supplementary Table 7. Distance analysis between different treatment groups at 142 DPI.** LA, left atrium. RA, right atrium. LVT, left ventricle top. LVB, left ventricle bottom. RVT, right ventricle top. RVB, right ventricle bottom. BNZ, benznidazole. N=15 mice per group and per position. Source data are provided as a Source Data file.

| Heart section | Group 1  | Group 2  | pseudo-F | p-value |
|---------------|----------|----------|----------|---------|
| LA            | naïve    | BNZ      | 1.356518 | 0.219   |
|               | naïve    | infected | 1.095370 | 0.292   |
|               | naïve    | combo    | 1.359726 | 0.228   |
|               | infected | BNZ      | 0.975107 | 0.379   |
|               | infected | combo    | 0.831580 | 0.459   |
|               | combo    | BNZ      | 0.654794 | 0.647   |
| RA            | naïve    | BNZ      | 1.247886 | 0.238   |
|               | naïve    | infected | 2.511789 | 0.041   |
|               | naïve    | combo    | 1.288730 | 0.235   |
|               | infected | BNZ      | 0.929379 | 0.407   |
|               | infected | combo    | 1.144374 | 0.293   |
|               | combo    | BNZ      | 0.346012 | 0.943   |
| LVT           | naïve    | BNZ      | 1.484447 | 0.159   |
|               | naïve    | infected | 1.187019 | 0.292   |
|               | naïve    | combo    | 1.461685 | 0.166   |
|               | infected | BNZ      | 1.051550 | 0.362   |
|               | infected | combo    | 1.214317 | 0.245   |
|               | combo    | BNZ      | 2.061494 | 0.043   |
| LVB           | naïve    | BNZ      | 2.715189 | 0.004   |
|               | naïve    | infected | 4.459738 | 0.002   |
|               | naïve    | combo    | 3.321633 | 0.001   |
|               | infected | BNZ      | 1.295228 | 0.273   |
|               | infected | combo    | 1.753522 | 0.083   |
|               | combo    | BNZ      | 1.869084 | 0.046   |
| RVT           | naïve    | BNZ      | 3.087695 | 0.001   |
|               | naïve    | infected | 3.914494 | 0.001   |
|               | naïve    | combo    | 2.366988 | 0.012   |
|               | infected | BNZ      | 2.117736 | 0.035   |
|               | infected | combo    | 2.610696 | 0.002   |
|               | combo    | BNZ      | 1.013534 | 0.419   |
| RVB           | naïve    | BNZ      | 4.910679 | 0.001   |
|               | naïve    | infected | 5.425939 | 0.001   |
|               | naïve    | combo    | 3.276360 | 0.001   |
|               | infected | BNZ      | 2.552585 | 0.010   |
|               | infected | combo    | 4.760043 | 0.001   |
|               | combo    | BNZ      | 2.368141 | 0.008   |

**Supplementary Table 8. Kruskal-Wallis with FDR-corrected post-hoc Dunn's test for distances between different treatment groups at 142 DPI.** LA, left atrium. RA, right atrium. LVT, left ventricle top. LVB, left ventricle bottom. RVT, right ventricle top. RVB, right ventricle bottom. BNZ, benznidazole. FDR, false discovery rate. Data represents every possible pairwise combinations between N=15 mice per group and per position. Source data are provided as a Source Data file.

| Heart section | Pair 1            | Pair 2            | FDR-corrected p value |
|---------------|-------------------|-------------------|-----------------------|
| LA            | naïve_VS_BNZ      | naïve_VS_naïve    | 0.139782138           |
|               | naïve_VS_BNZ      | naïve_VS_infected | 0.160693030           |
|               | naïve_VS_naïve    | naïve_VS_infected | 0.776120010           |
|               | naïve_VS_BNZ      | naïve_VS_combo    | 0.179862414           |
|               | naïve_VS_naïve    | naïve_VS_combo    | 0.010418740           |
|               | naïve_VS_infected | naïve_VS_combo    | 0.005658156           |
| RA            | naïve_VS_BNZ      | naïve_VS_naïve    | 0.1908288             |
|               | naïve_VS_BNZ      | naïve_VS_infected | 0.1936673             |
|               | naïve_VS_naïve    | naïve_VS_infected | 0.0262561             |
|               | naïve_VS_BNZ      | naïve_VS_combo    | 0.4614456             |
|               | naïve_VS_naïve    | naïve_VS_combo    | 0.1038900             |
|               | naïve_VS_infected | naïve_VS_combo    | 0.4266253             |
| LVT           | naïve_VS_BNZ      | naïve_VS_naïve    | 0.88251583            |
|               | naïve_VS_BNZ      | naïve_VS_infected | 0.03130183            |
|               | naïve_VS_naïve    | naïve_VS_infected | 0.05686250            |
|               | naïve_VS_BNZ      | naïve_VS_combo    | 0.01622882            |
|               | naïve_VS_naïve    | naïve_VS_combo    | 0.03320798            |
|               | naïve_VS_infected | naïve_VS_combo    | 0.67229235            |
| LVB           | naïve_VS_BNZ      | naïve_VS_naïve    | 9.456508e-10          |
|               | naïve_VS_BNZ      | naïve_VS_infected | 9.802618e-03          |
|               | naïve_VS_naïve    | naïve_VS_infected | 5.412709e-05          |
|               | naïve_VS_BNZ      | naïve_VS_combo    | 8.212829e-03          |
|               | naïve_VS_naïve    | naïve_VS_combo    | 5.778669e-05          |
|               | naïve_VS_infected | naïve_VS_combo    | 8.944717e-01          |
| RVT           | naïve_VS_BNZ      | naïve_VS_naïve    | 1.523759e-04          |
|               | naïve_VS_BNZ      | naïve_VS_infected | 1.761728e-01          |
|               | naïve_VS_naïve    | naïve_VS_infected | 1.729419e-06          |
|               | naïve_VS_BNZ      | naïve_VS_combo    | 1.527634e-01          |
|               | naïve_VS_naïve    | naïve_VS_combo    | 6.861743e-03          |
|               | naïve_VS_infected | naïve_VS_combo    | 8.017866e-03          |
| RVB           | naïve_VS_BNZ      | naïve_VS_naïve    | 8.521031e-01          |
|               | naïve_VS_BNZ      | naïve_VS_infected | 1.436145e-07          |
|               | naïve_VS_naïve    | naïve_VS_infected | 2.818214e-06          |
|               | naïve_VS_BNZ      | naïve_VS_combo    | 7.745506e-01          |
|               | naïve_VS_naïve    | naïve_VS_combo    | 8.225285e-01          |
|               | naïve_VS_infected | naïve_VS_combo    | 3.581962e-07          |

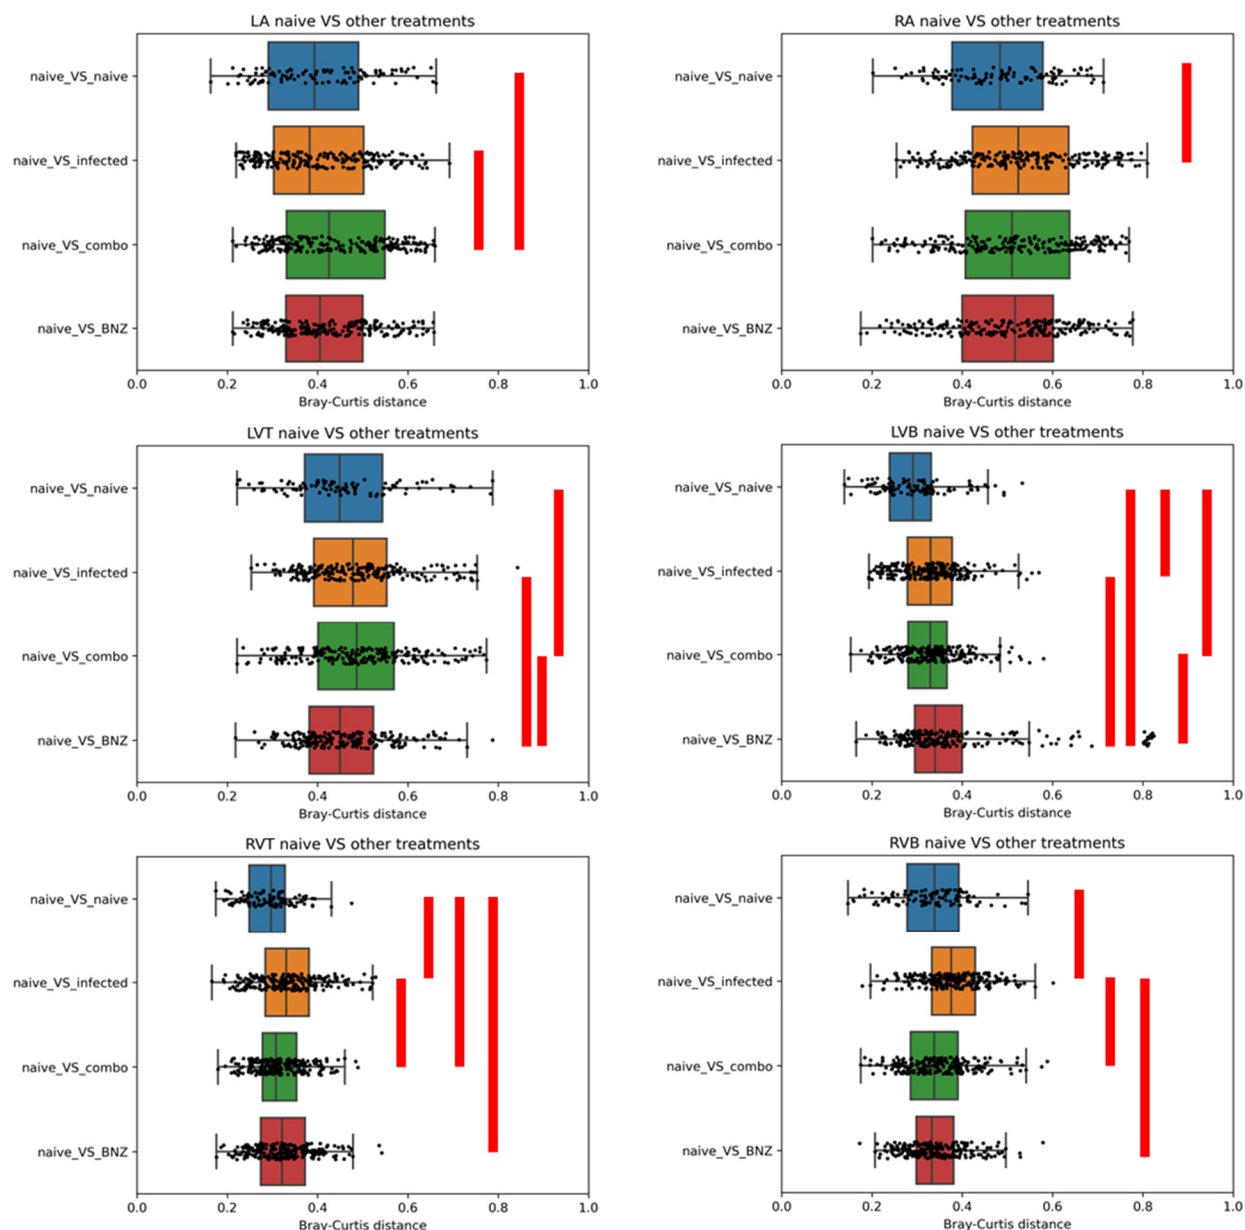

**Supplementary Figure 9. Distance analysis boxplot between naïve groups and other experimental groups at 142 DPI.** Each data point is the Bray-Curtis distance in terms of overall small molecule composition between every pair of samples in the listed groups. N=15 mice per group and per position. Red line, p-value <0.05 by Mann-Whitney U Test, two-sided, FDR-corrected. Boxplots represent median, upper and lower quartiles, with whiskers extending to show the rest of the distribution, except for points that are determined to be outliers by being beyond the interquartile range  $\pm 1.5$  times the interquartile range. Exact p-values are in Supplementary Table 8. LA, left atrium. RA, right atrium. LVT, left ventricle top. LVB, left ventricle bottom. RVT, right ventricle top. RVB, right ventricle bottom. BNZ, benznidazole. Source data are provided as a Source Data file.

**Supplementary Table 9. Kruskal-Wallis with FDR-corrected post-hoc Dunn's test of distances between infected no treatment group and other treatment groups at 142 DPI.** LA, left atrium. RA, right atrium. LVT, left ventricle top. LVB, left ventricle bottom. RVT, right ventricle top. RVB, right ventricle bottom. BNZ, benznidazole. FDR, false discovery rate. Data represents every possible pairwise combinations between N=15 mice per group and per position. Source data are provided as a Source Data file.

| Heart section | Pair 1               | Pair 2               | FDR-corrected p value |
|---------------|----------------------|----------------------|-----------------------|
| LA            | infected_VS_BNZ      | infected_VS_infected | 0.4411514             |
|               | infected_VS_BNZ      | infected_VS_combo    | 0.1796762             |
|               | infected_VS_infected | infected_VS_combo    | 0.1328960             |
| RA            | infected_VS_BNZ      | infected_VS_infected | 0.7325454             |
|               | infected_VS_BNZ      | infected_VS_combo    | 0.8818900             |
|               | infected_VS_infected | infected_VS_combo    | 0.9304309             |
| LVT           | infected_VS_BNZ      | infected_VS_infected | 0.11787664            |
|               | infected_VS_BNZ      | infected_VS_combo    | 0.01237103            |
|               | infected_VS_infected | infected_VS_combo    | 0.59656541            |
| LVB           | infected_VS_BNZ      | infected_VS_infected | 0.01219156            |
|               | infected_VS_BNZ      | infected_VS_combo    | 0.62243881            |
|               | infected_VS_infected | infected_VS_combo    | 0.01968717            |
| RVT           | infected_VS_BNZ      | infected_VS_infected | 0.3474791             |
|               | infected_VS_BNZ      | infected_VS_combo    | 0.8204677             |
|               | infected_VS_infected | infected_VS_combo    | 0.5053970             |
| RVB           | infected_VS_BNZ      | infected_VS_infected | 1.123535e-01          |
|               | infected_VS_BNZ      | infected_VS_combo    | 7.433810e-08          |
|               | infected_VS_infected | infected_VS_combo    | 6.365436e-03          |

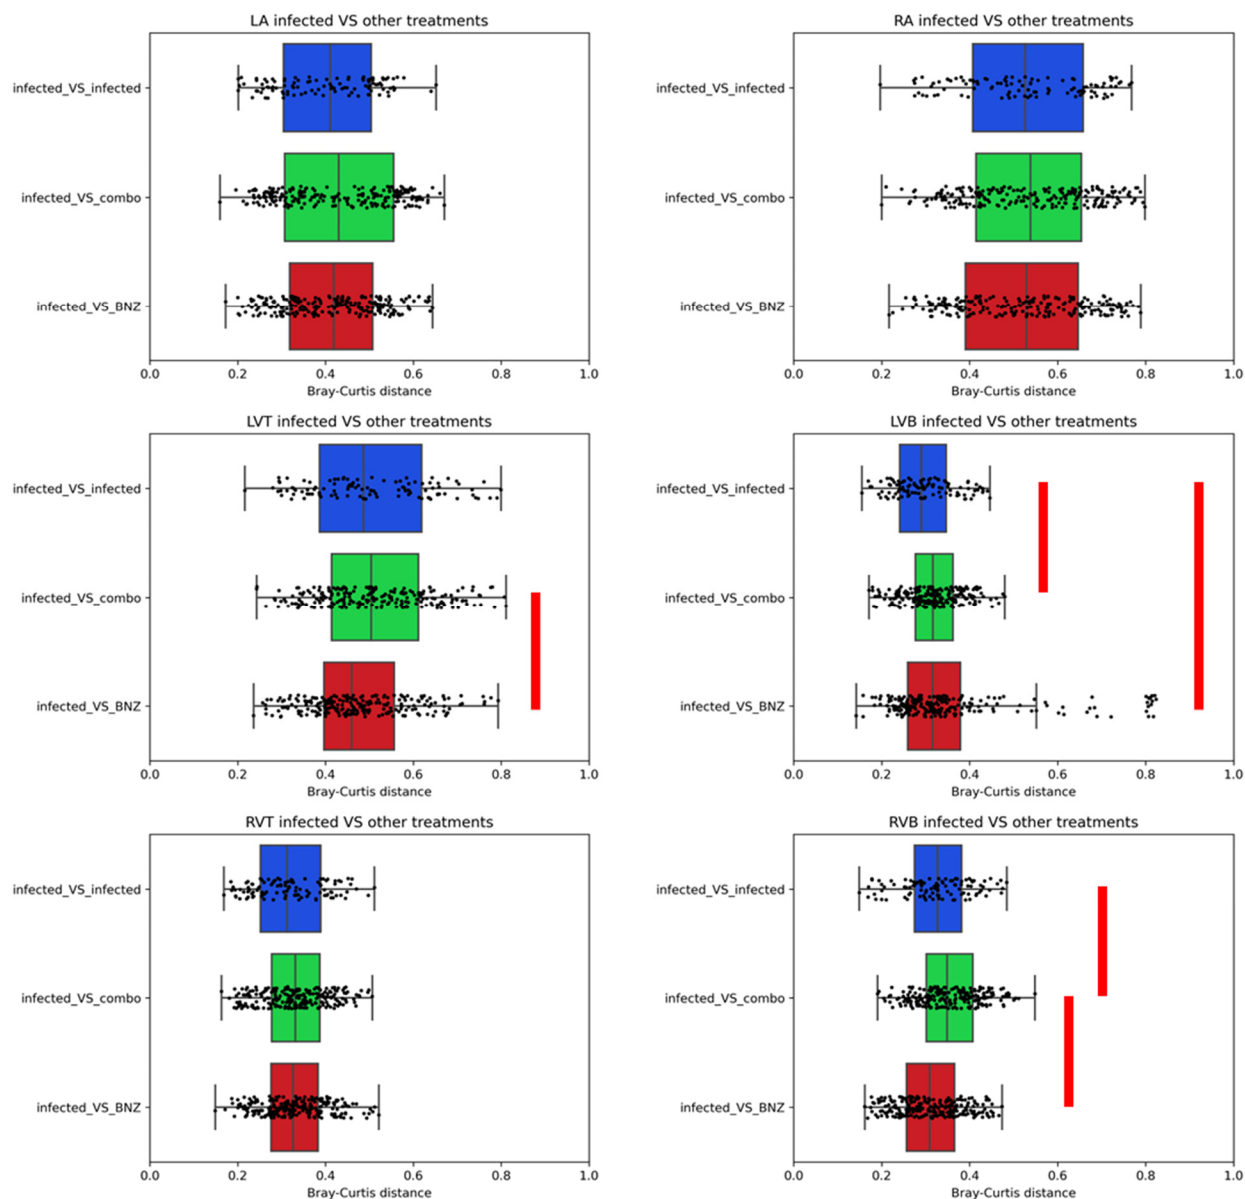

**Supplementary Figure 10. Distance analysis boxplots between infected no treatment group and other treatment groups at 142 DPI.** Each data point is the Bray-Curtis distance in terms of overall small molecule composition between every pair of samples. N=15 mice per group and per position. Red line, p-value <0.05 by Mann-Whitney U Test, two-sided, FDR-corrected. Boxplots represent median, upper and lower quartiles, with whiskers extending to show the rest of the distribution, except for points that are determined to be outliers by being beyond the interquartile range +/- 1.5 times the interquartile range. Exact p-values are in Supplementary Table 9. LA, left atrium. RA, right atrium. LVT, left ventricle top. LVB, left ventricle bottom. RVT, right ventricle top. RVB, right ventricle bottom. BNZ, benznidazole. Source data are provided as a Source Data file.

**Supplementary Table 10. Distance analysis between different treatment groups at 142 DPI without high parasite burden post-BNZ treatment outlier mouse.** LA, left atrium. RA, right atrium. LVT, left ventricle top. LVB, left ventricle bottom. RVT, right ventricle top. RVB, right ventricle bottom. BNZ, benznidazole. N=15 mice per group and per position. Source data are provided as a Source Data file.

| Heart section | Group 1  | Group 2  | pseudo-F | p-value |
|---------------|----------|----------|----------|---------|
| LA            | naïve    | BNZ      | 1.325617 | 0.232   |
|               | naïve    | infected | 1.09537  | 0.31    |
|               | naïve    | combo    | 1.359726 | 0.222   |
|               | infected | BNZ      | 0.894473 | 0.443   |
|               | infected | combo    | 0.83158  | 0.484   |
|               | combo    | BNZ      | 0.769384 | 0.543   |
| RA            | naïve    | BNZ      | 1.406805 | 0.186   |
|               | naïve    | infected | 2.511789 | 0.044   |
|               | naïve    | combo    | 1.28873  | 0.214   |
|               | infected | BNZ      | 0.7668   | 0.522   |
|               | infected | combo    | 1.144374 | 0.279   |
|               | combo    | BNZ      | 0.457876 | 0.852   |
| LVT           | naïve    | BNZ      | 1.949067 | 0.054   |
|               | naïve    | infected | 1.187019 | 0.277   |
|               | naïve    | combo    | 1.461685 | 0.173   |
|               | infected | BNZ      | 1.384779 | 0.182   |
|               | infected | combo    | 1.214317 | 0.265   |
|               | combo    | BNZ      | 2.323148 | 0.026   |
| LVB           | naïve    | BNZ      | 2.845178 | 0.001   |
|               | naïve    | infected | 4.459738 | 0.001   |
|               | naïve    | combo    | 3.321633 | 0.001   |
|               | infected | BNZ      | 1.295049 | 0.279   |
|               | infected | combo    | 1.753522 | 0.078   |
|               | combo    | BNZ      | 2.067337 | 0.031   |
| RVT           | naïve    | BNZ      | 3.638358 | 0.002   |
|               | naïve    | infected | 3.914494 | 0.001   |
|               | naïve    | combo    | 2.366988 | 0.008   |
|               | infected | BNZ      | 2.032209 | 0.046   |
|               | infected | combo    | 2.610696 | 0.002   |
|               | combo    | BNZ      | 1.295884 | 0.224   |
| RVB           | naïve    | BNZ      | 5.356061 | 0.001   |
|               | naïve    | infected | 5.425939 | 0.001   |
|               | naïve    | combo    | 3.27636  | 0.004   |
|               | infected | BNZ      | 2.336337 | 0.018   |
|               | infected | combo    | 4.760043 | 0.001   |
|               | combo    | BNZ      | 2.566525 | 0.004   |

**Supplementary Table 11. Kruskal-Wallis with FDR-corrected post-hoc Dunn's test of distances between different treatment groups at 142 DPI without high parasite burden post-BNZ treatment outlier mouse.** LA, left atrium. RA, right atrium. LVT, left ventricle top. LVB, left ventricle bottom. RVT, right ventricle top. RVB, right ventricle bottom. BNZ, benznidazole. FDR, false discovery rate. Data represents every possible pairwise combinations between N=15 mice per group and per position. Source data are provided as a Source Data file.

| Heart section | Pair1             | Pair2             | FDR-corrected p value |
|---------------|-------------------|-------------------|-----------------------|
| LA            | naïve_VS_BNZ      | naïve_VS_naïve    | 0.295489565           |
|               | naïve_VS_BNZ      | naïve_VS_infected | 0.251628525           |
|               | naïve_VS_naïve    | naïve_VS_infected | 0.774607473           |
|               | naïve_VS_BNZ      | naïve_VS_combo    | 0.095755447           |
|               | naïve_VS_naïve    | naïve_VS_combo    | 0.010810319           |
|               | naïve_VS_infected | naïve_VS_combo    | 0.006009265           |
| RA            | naïve_VS_BNZ      | naïve_VS_naïve    | 0.20069214            |
|               | naïve_VS_BNZ      | naïve_VS_infected | 0.20583003            |
|               | naïve_VS_naïve    | naïve_VS_infected | 0.02704533            |
|               | naïve_VS_BNZ      | naïve_VS_combo    | 0.47119782            |
|               | naïve_VS_naïve    | naïve_VS_combo    | 0.10686888            |
|               | naïve_VS_infected | naïve_VS_combo    | 0.42504515            |
| LVT           | naïve_VS_BNZ      | naïve_VS_naïve    | 0.788488612           |
|               | naïve_VS_BNZ      | naïve_VS_infected | 0.011706694           |
|               | naïve_VS_naïve    | naïve_VS_infected | 0.057448034           |
|               | naïve_VS_BNZ      | naïve_VS_combo    | 0.003267821           |
|               | naïve_VS_naïve    | naïve_VS_combo    | 0.022433229           |
|               | naïve_VS_infected | naïve_VS_combo    | 0.672722645           |
| LVB           | naïve_VS_BNZ      | naïve_VS_naïve    | 2.406726e-09          |
|               | naïve_VS_BNZ      | naïve_VS_infected | 1.397022e-02          |
|               | naïve_VS_naïve    | naïve_VS_infected | 5.705367e-05          |
|               | naïve_VS_BNZ      | naïve_VS_combo    | 1.221490e-02          |
|               | naïve_VS_naïve    | naïve_VS_combo    | 5.932090e-05          |
|               | naïve_VS_infected | naïve_VS_combo    | 9.001797e-01          |
| RVT           | naïve_VS_BNZ      | naïve_VS_naïve    | 2.671548e-04          |
|               | naïve_VS_BNZ      | naïve_VS_infected | 1.818625e-01          |
|               | naïve_VS_naïve    | naïve_VS_infected | 1.764897e-06          |
|               | naïve_VS_BNZ      | naïve_VS_combo    | 1.660460e-01          |
|               | naïve_VS_naïve    | naïve_VS_combo    | 6.799045e-03          |
|               | naïve_VS_infected | naïve_VS_combo    | 8.235658e-03          |
| RVB           | naïve_VS_BNZ      | naïve_VS_naïve    | 6.714309e-01          |
|               | naïve_VS_BNZ      | naïve_VS_infected | 1.777988e-06          |
|               | naïve_VS_naïve    | naïve_VS_infected | 2.842693e-06          |
|               | naïve_VS_BNZ      | naïve_VS_combo    | 8.226742e-01          |
|               | naïve_VS_naïve    | naïve_VS_combo    | 6.694273e-01          |
|               | naïve_VS_infected | naïve_VS_combo    | 6.575513e-07          |

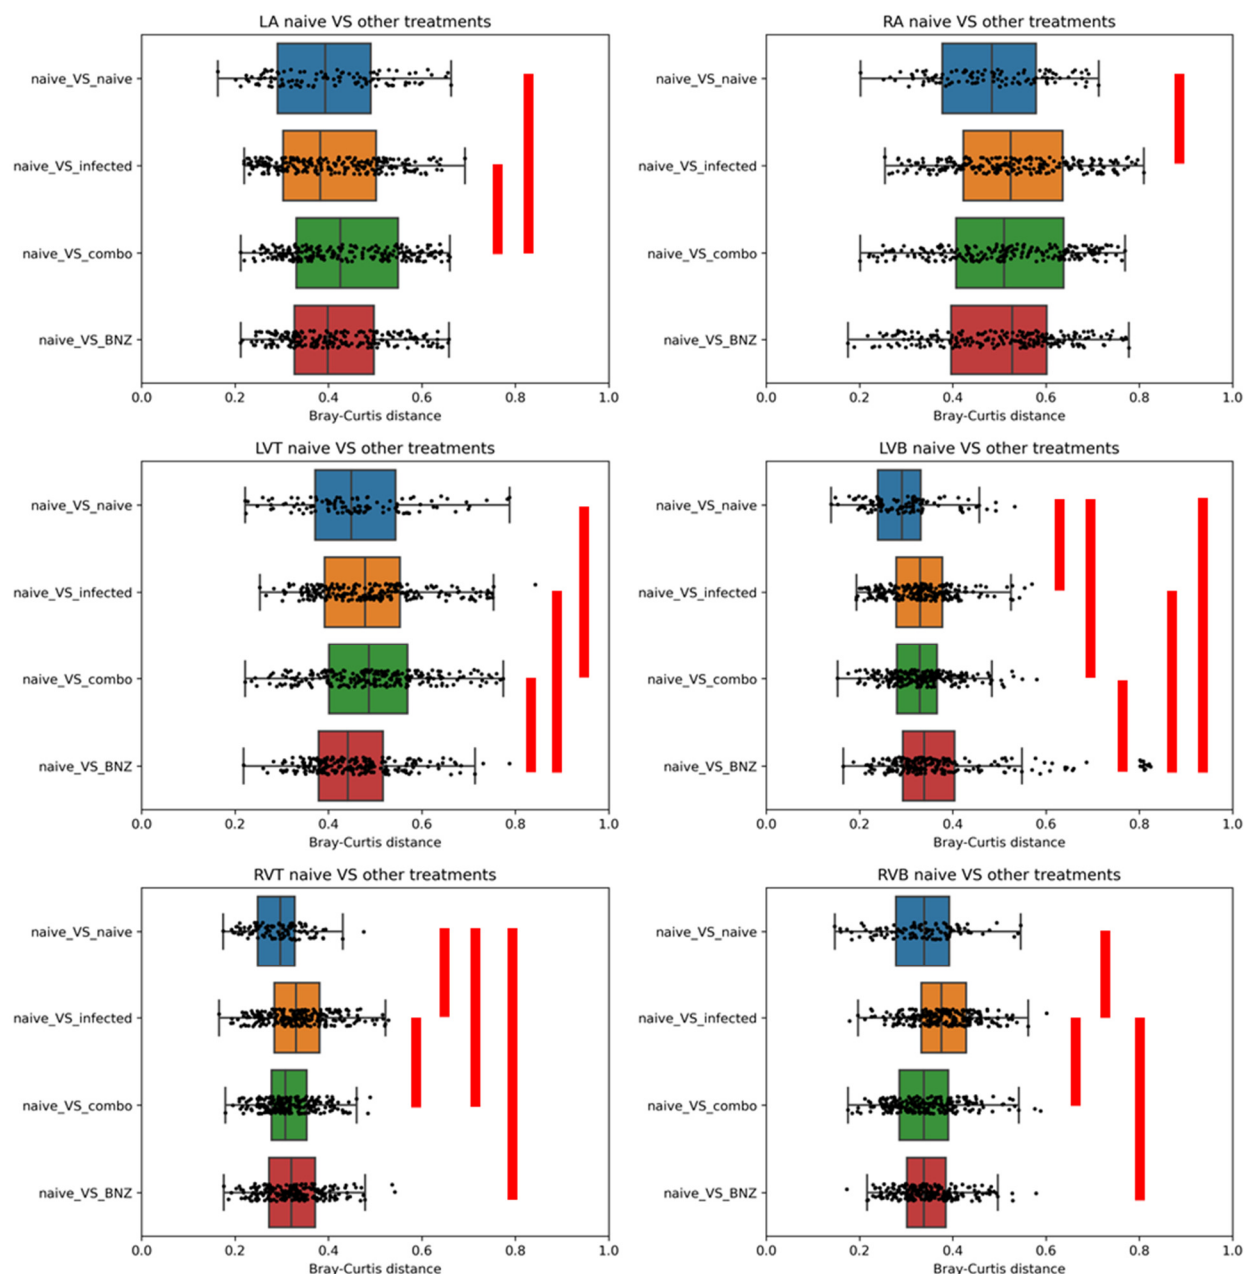

**Supplementary Figure 11. Distance analysis boxplot between naïve groups and other experimental groups at 142DPI without high parasite burden post-BNZ treatment outlier mouse.** Each data point is the Bray-Curtis distance in terms of overall small molecule composition between every pair of samples. N=15 mice per group and per position. Red line, p-value <0.05 by Mann-Whitney U Test, two-sided, FDR-corrected. Boxplots represent median, upper and lower quartiles, with whiskers extending to show the rest of the distribution, except for points that are determined to be outliers by being beyond the interquartile range +/- 1.5 times the interquartile range. Exact p-values are in Supplementary Table 11. LA, left atrium. RA, right atrium. LVT, left ventricle top. LVB, left ventricle bottom. RVT, right ventricle top. RVB, right ventricle bottom. BNZ, benznidazole. Source data are provided as a Source Data file.

**Supplementary Table 12. Kruskal-Wallis with FDR-corrected post-hoc Dunn's test of distances between infected no treatment group and other treatment groups at 142 DPI without high parasite burden post-BNZ treatment outlier mouse.** LA, left atrium. RA, right atrium. LVT, left ventricle top. LVB, left ventricle bottom. RVT, right ventricle top. RVB, right ventricle bottom. BNZ, benznidazole. FDR, false discovery rate. Data represents every possible pairwise combinations between N=15 mice per group and per position. Source data are provided as a Source Data file.

| Heart section | Pair1                | Pair2                | FDR-corrected p value |
|---------------|----------------------|----------------------|-----------------------|
| LA            | infected_VS_BNZ      | infected_VS_infected | 0.63264802            |
|               | infected_VS_BNZ      | infected_VS_combo    | 0.09687013            |
|               | infected_VS_infected | infected_VS_combo    | 0.14182864            |
| RA            | infected_VS_BNZ      | infected_VS_infected | 0.7682509             |
|               | infected_VS_BNZ      | infected_VS_combo    | 0.4544656             |
|               | infected_VS_infected | infected_VS_combo    | 0.6159846             |
| LVT           | infected_VS_BNZ      | infected_VS_infected | 0.060225950           |
|               | infected_VS_BNZ      | infected_VS_combo    | 0.003792884           |
|               | infected_VS_infected | infected_VS_combo    | 0.587838689           |
| LVB           | infected_VS_BNZ      | infected_VS_infected | 0.02481829            |
|               | infected_VS_BNZ      | infected_VS_combo    | 0.91364429            |
|               | infected_VS_infected | infected_VS_combo    | 0.03603772            |
| RVT           | infected_VS_BNZ      | infected_VS_infected | 0.5520473             |
|               | infected_VS_BNZ      | infected_VS_combo    | 0.4810231             |
|               | infected_VS_infected | infected_VS_combo    | 0.4777285             |
| RVB           | infected_VS_BNZ      | infected_VS_infected | 4.311688e-02          |
|               | infected_VS_BNZ      | infected_VS_combo    | 4.854801e-09          |
|               | infected_VS_infected | infected_VS_combo    | 6.522770e-03          |

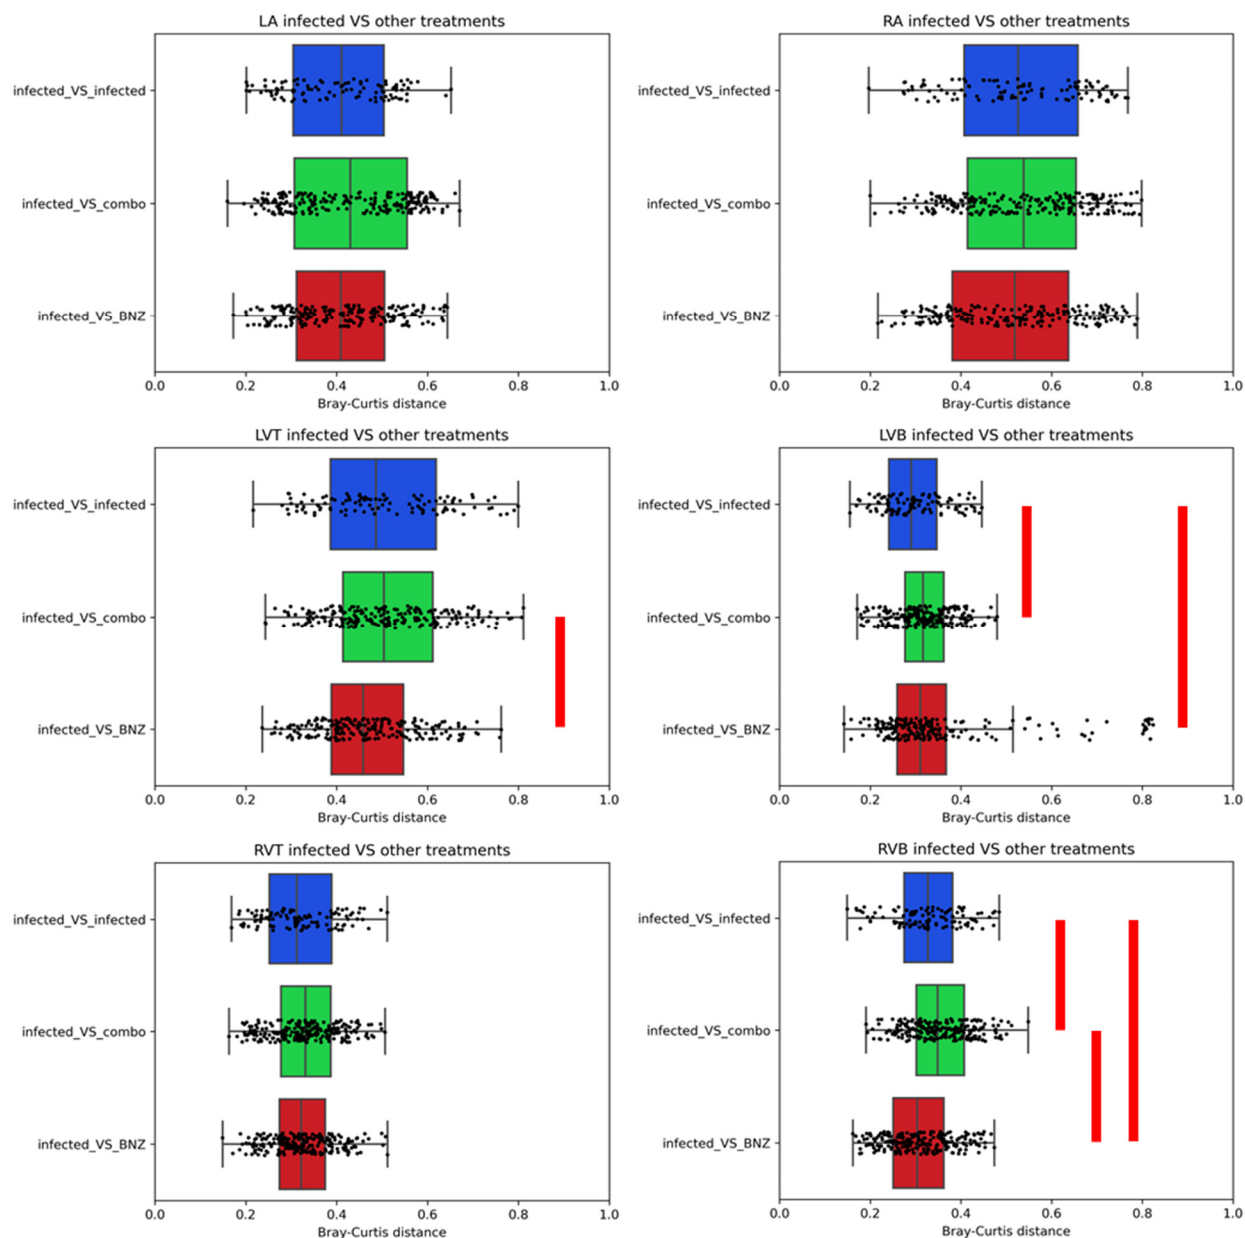

**Supplementary Figure 12. Distance analysis boxplots between infected no treatment group and other treatment groups at 142DPI without high parasite burden post-BNZ treatment outlier mouse.** Each data point is the Bray-Curtis distance in terms of overall small molecule composition between every pair of samples. N=15 mice per group and per position. Red line, p-value <0.05 by Mann-Whitney U Test, two-sided, FDR-corrected. Boxplots represent median, upper and lower quartiles, with whiskers extending to show the rest of the distribution, except for points that are determined to be outliers by being beyond the interquartile range +/- 1.5 times the interquartile range. Exact p-values are in Supplementary Table 12. LA, left atrium. RA, right atrium. LVT, left ventricle top. LVB, left ventricle bottom. RVT, right ventricle top. RVB, right ventricle bottom. BNZ, benznidazole. Source data are provided as a Source Data file.

## **Supplementary Note 1. Confirmation of incomplete metabolic restoration by BNZ in an independent *T. cruzi* infection system.**

**Methods – *in vivo* experimentation:** 5-week-old male Swiss Webster mice (Charles River) were infected by intraperitoneal injection with 500,000 Sylvio X10/4 parasites or mock-injected (uninfected controls). Ten weeks post-infection, mice were treated for 14 days with 100 mg/kg benznidazole (BNZ) by intraperitoneal injection or left untreated. Mice were euthanized 4 weeks post-treatment (112 days post-infection). Hearts were collected and either placed in RNeasy lysis buffer (for RNA-seq) or snap-frozen in liquid nitrogen (for LC-MS).

**Methods – RNA analysis:** RNA was extracted using the Zymo ZR Duet DNA/RNA Miniprep Plus kit. 4 µg RNA was shipped in RNA stabilization tubes to GENEWIZ®, who performed cDNA library synthesis and high-throughput Illumina sequencing. Paired-end sequence data was quality filtered using AdapterRemoval (v2) to remove reads with uncalled bases ('N'), residual adapter sequences, and trimmed to remove bases with low quality ( $q < 30$ )<sup>1</sup>. Transcript quantification was performed using Salmon (v1.1.0), with the ENSEMBL mouse transcriptome (GRCm38, build p6) as reference<sup>2</sup>. The resulting quantification data was imported into R ('tximport')<sup>3</sup>, followed by gene expression analysis using DESeq2<sup>4</sup>. N=5/group.

**Methods – LC-MS analysis:** Small molecule extraction and data acquisition were as described in the main manuscript Methods, except that sample injection volume was 20 µL. Data was processed in MZmine as in **Supplementary Table 4**, except for the following parameters: MS1 noise level, 3E6; deconvolution method: Wavelets (ADAP), with signal to noise threshold: 10, signal to noise estimator: intensity window signal to noise, minimum feature height: 3E6, coefficient/area threshold: 110, peak duration range: 0.03-1.5 min, RT wavelet range: 0-0.1; deisotoping: representative isotope was most intense; filtering: retention time 0.2-7.2 min; gap-filling: intensity tolerance, 10%;  $m/z$  tolerance, 10 ppm; retention time tolerance: 0.5 min. Batch correction was performed using WavelCA 2.0<sup>5</sup>. All parameters were set to default, except the following: alpha, 0; cutoff, 0.1; k, 20. Principal coordinate and PERMANOVA analysis was performed using QIIME2<sup>6</sup>. N=5/group (BNZ, vehicle) and N=6/group (uninfected).

**Methods – data availability:** RNA-seq data has been deposited in SRA, bioproject accession PRJNA670449 [<https://www.ncbi.nlm.nih.gov/bioproject/PRJNA670449/>]. Small molecule analysis data has been deposited in MassIVE, accession number MSV000092090 [doi:10.25345/C5C824Q8C]. Source data are provided as a Source Data file.

See Supplementary Figures 13-16, below, for LC-MS and RNA-seq data.

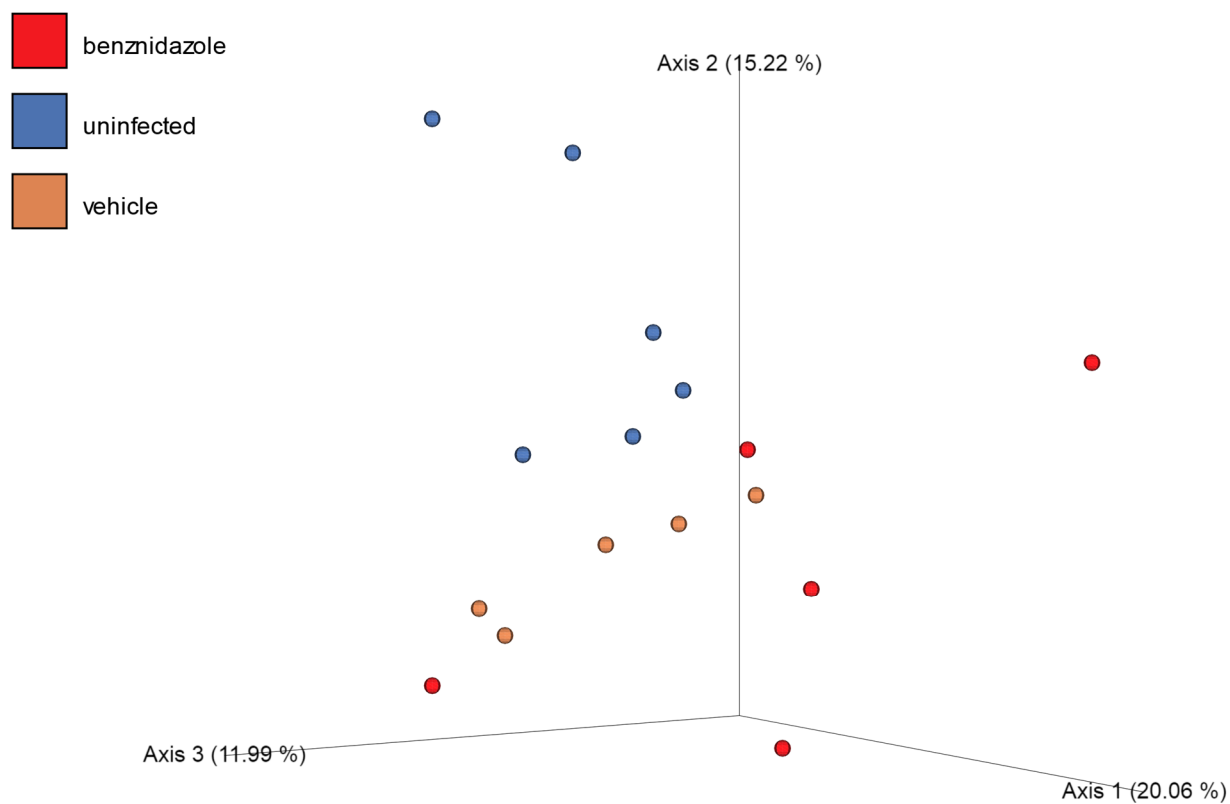

**Supplementary Figure 13. Lack of small molecule restoration in BNZ-treated mice.** Pairwise PERMANOVA BNZ to uninfected, q-value=0.036, pseudo-F=1.794449. Pairwise PERMANOVA BNZ to vehicle, q-value=0.799, pseudo-F=0.757399. N=5/group (BNZ, vehicle) and N=6/group (uninfected). Source data are provided as a Source Data file.

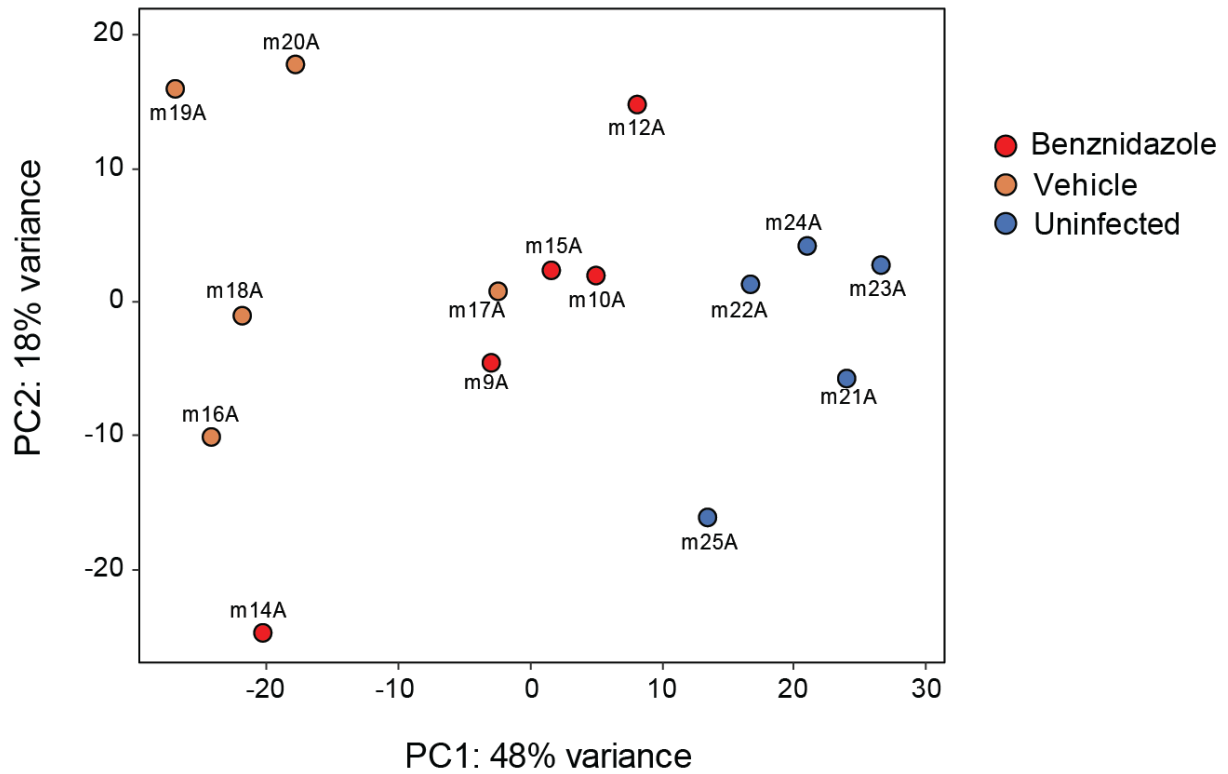

**Supplementary Figure 14. Incomplete restoration of gene expression in BNZ-treated mice by PCA analysis.** Principal component analysis of regularized logarithm transformed ('rlog') gene counts with treatment-independent estimation of dispersion. N=5/group. PC, principal component. Source data are provided as a Source Data file.

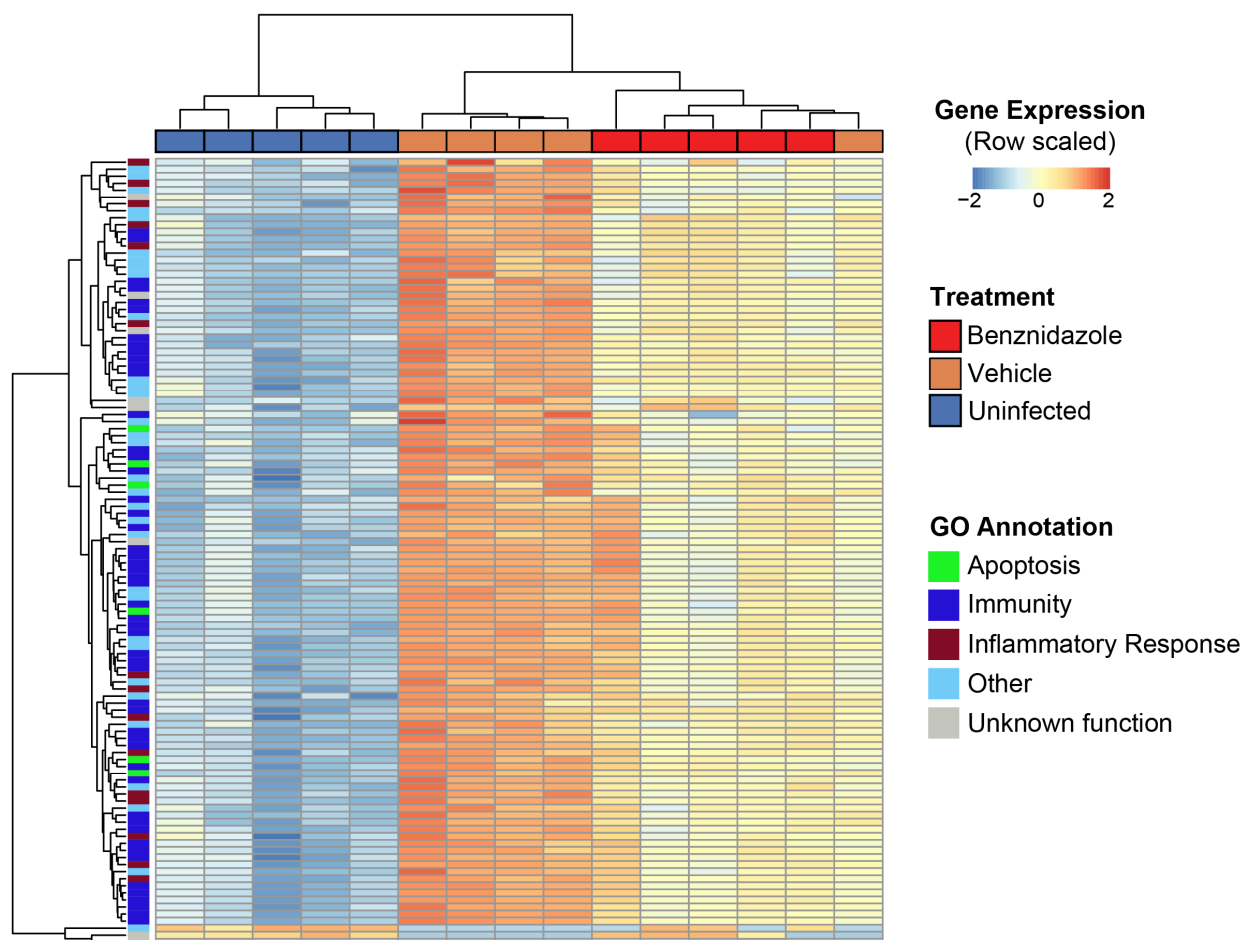

**Supplementary Figure 15. Only partial restoration of transcripts in BNZ-treated mice.** Likelihood ratio tests with treatment as the predictor variable identified a total of 112 differentially expressed genes (Log-fold change:  $\pm 2$ , FDR-adjusted  $P < 0.05$ ). Of these, 51 genes are associated with immunity, and 15 genes are associated with inflammatory response processes. Heatmap generated from log<sub>2</sub>-transformed (pseudo-count of 1), centered and scaled (row mean = 0, row s.d. = 1), gene counts. Rows represent differentially expressed genes annotated by Gene Ontology (Biological process). Columns represent mouse samples annotated by treatment group. N=5/group. Source data are provided as a Source Data file.

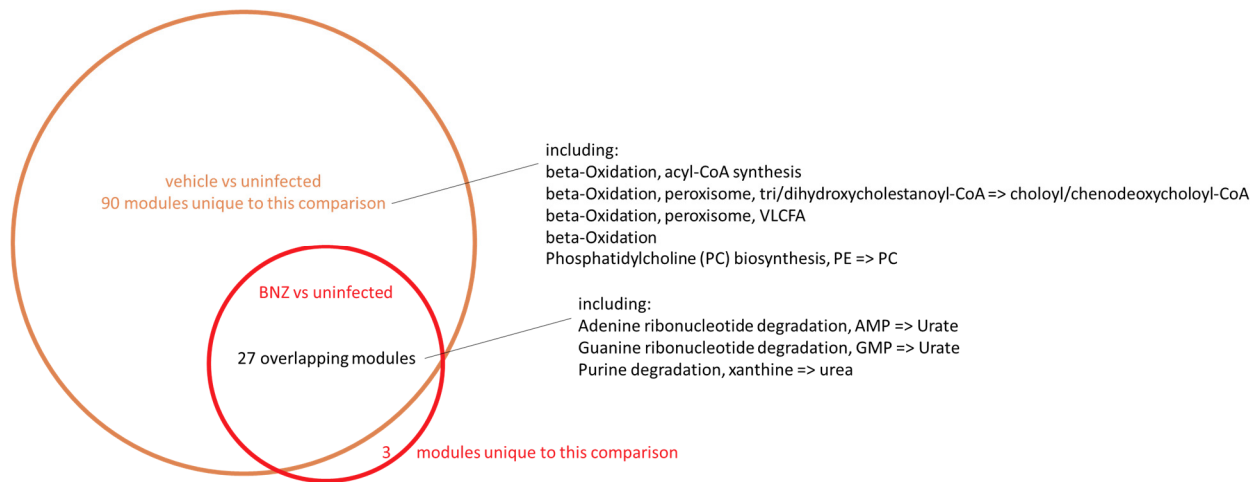

**Supplementary Figure 16. Impact of BNZ treatment on infection-perturbed metabolic modules.** Gene count data was aggregated at the metabolic module-level. Likelihood ratio tests with treatment as the predictor variable were used to identify differential metabolic modules (FDR-adjusted  $P < 0.05$ ), followed by pairwise comparisons (vehicle-uninfected, and BNZ-uninfected) using Wald tests (FDR-adjusted  $P < 0.05$ ). Strikingly, most of the differential modules between BNZ and uninfected were also differential between vehicle and uninfected, supporting the occurrence of infection-induced metabolic changes that fail to be restored by BNZ treatment. Overlapping modules between vehicle vs uninfected and BNZ vs uninfected include multiple modules related to purine metabolism, matching with our small molecule analysis data showing that it is harder to restore purine metabolism. On the other hand, beta-oxidation modules were only differential for the comparison between vehicle vs uninfected and not BNZ vs uninfected, concurring with our small molecule analysis showing easier restoration of lipid metabolites. PE, phosphatidylethanolamine. VLCFA, very long chain fatty acids. N=5/group. Source data is in Supplementary Table 1.

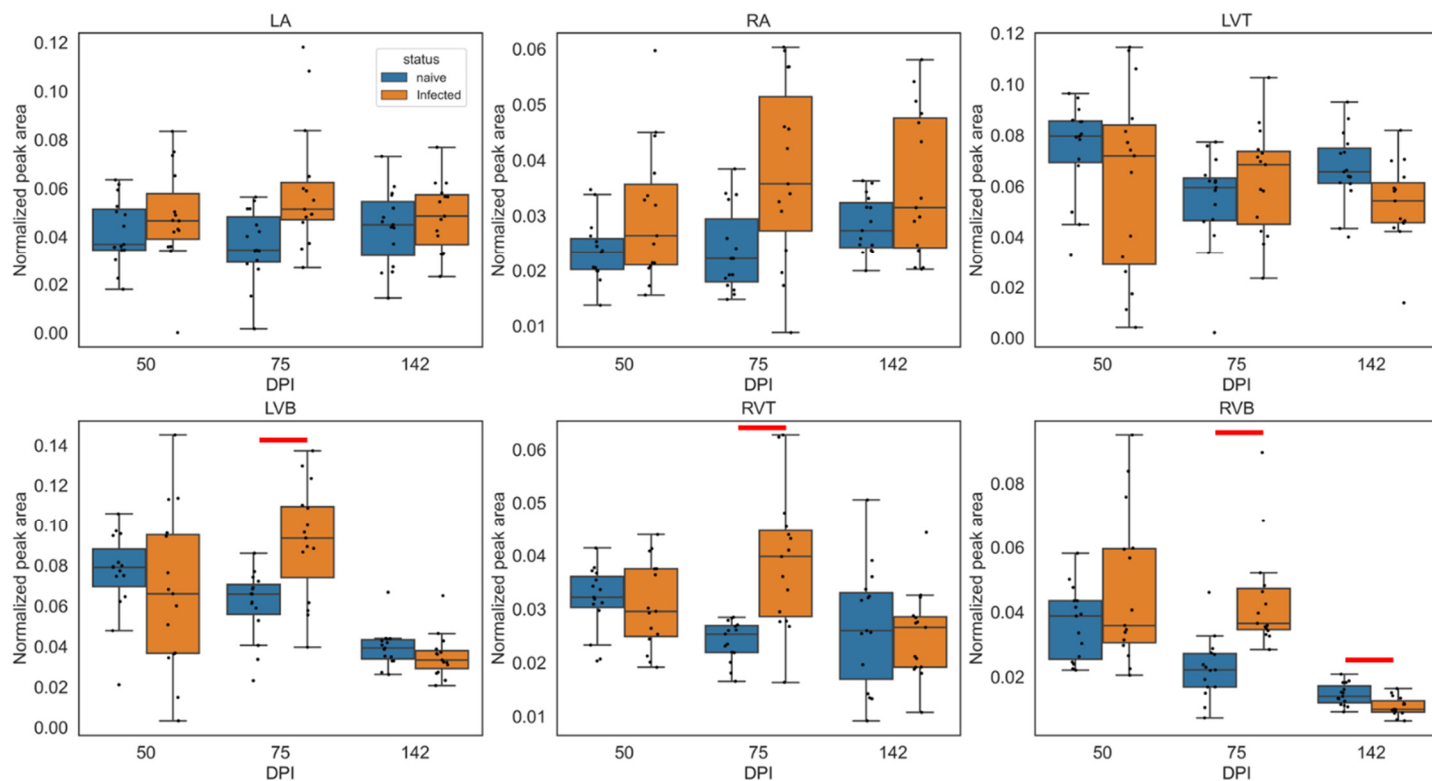

**Supplementary Figure 17. Impact of infection duration on glycerophosphocholines in  $m/z$  range 400 to 500.** Data represents summed peak areas for all glycerophosphocholines in  $m/z$  range 400 to 500, identified as described in Methods. DPI, days post-infection. LA, left atrium. RA, right atrium. LVT, left ventricle top. LVB, left ventricle bottom. RVT, right ventricle top. RVB, right ventricle bottom. Red line, p-value < 0.05 by Mann-Whitney U test, two-sided, FDR-corrected. Boxplots represent median, upper and lower quartiles, with whiskers extending to show the rest of the distribution, except for points that are determined to be outliers by being beyond the interquartile range  $\pm 1.5$  times the interquartile range. N=15 mice per group and per position. Source data are provided as a Source Data file.

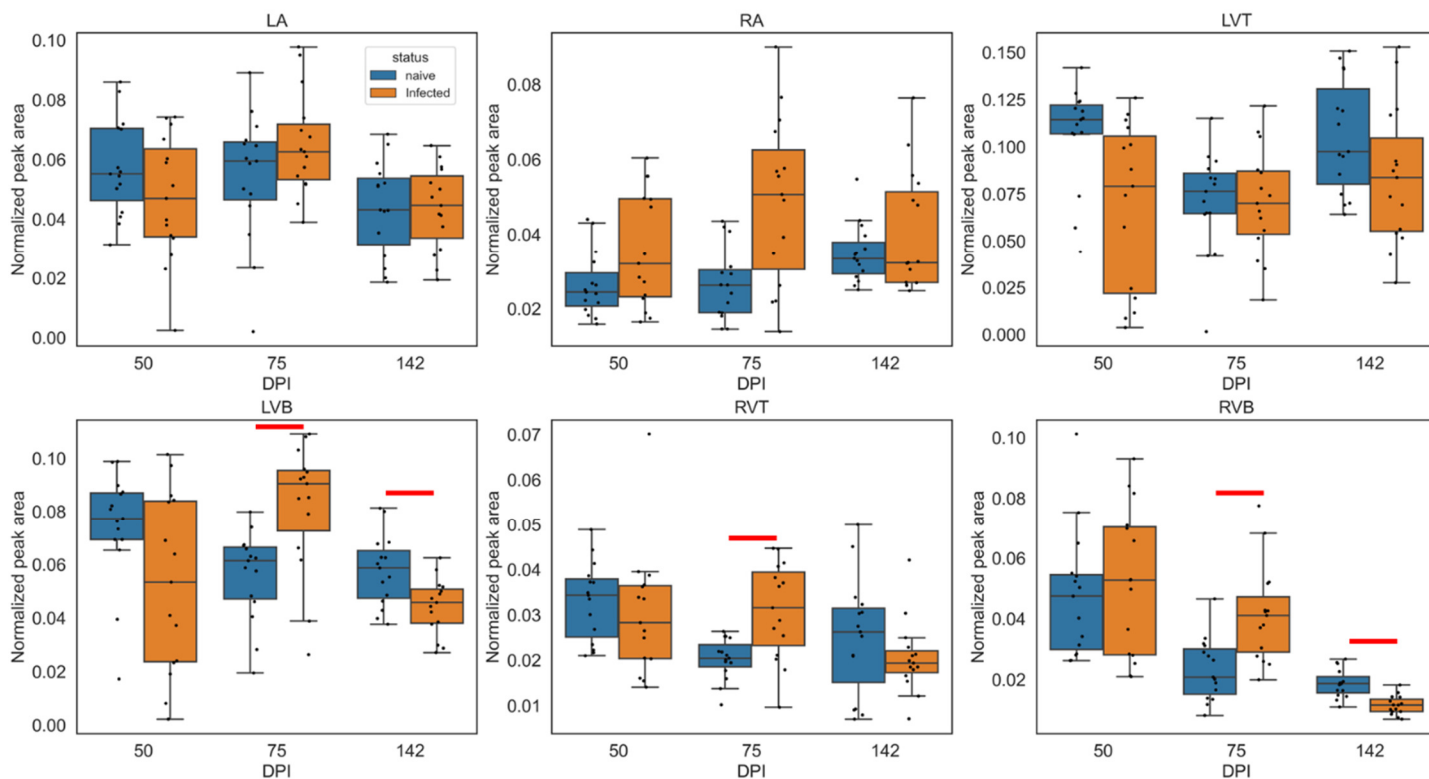

**Supplementary Figure 18. Impact of infection duration on glycerophosphocholines in  $m/z$  range 500 to 600.** Data represents summed peak areas for all glycerophosphocholines in  $m/z$  range 500 to 600. DPI, days post-infection. LA, left atrium. RA, right atrium. LVT, left ventricle top. LVB, left ventricle bottom. RVT, right ventricle top. RVB, right ventricle bottom. Red line, p-value < 0.05 by Mann-Whitney U test, two-sided, FDR-corrected. Boxplots represent median, upper and lower quartiles, with whiskers extending to show the rest of the distribution, except for points that are determined to be outliers by being beyond the interquartile range  $\pm 1.5$  times the interquartile range. N=15 mice per group and per position. Source data are provided as a Source Data file.

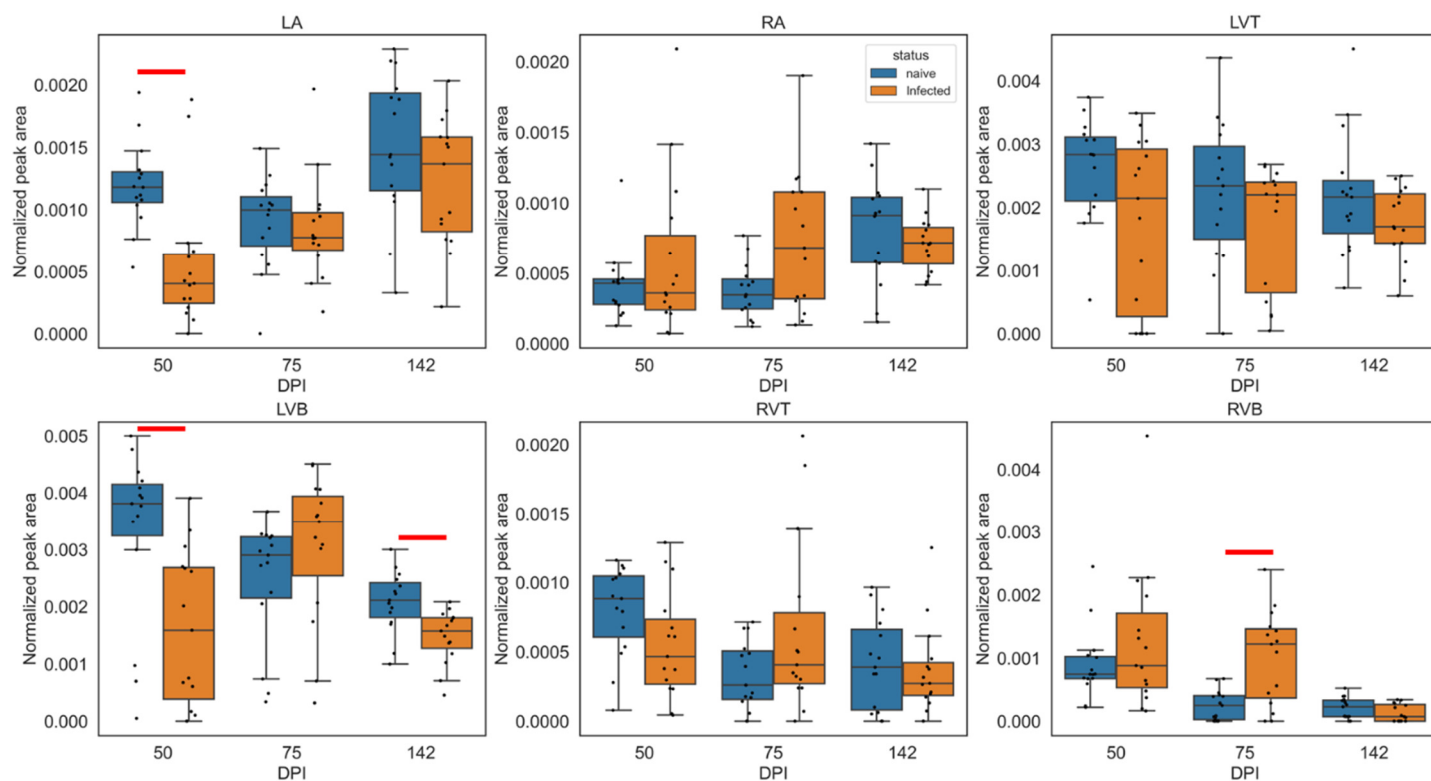

**Supplementary Figure 19. Impact of infection duration on glycerophosphocholines in  $m/z$  range 600 to 700.** Data represents summed peak areas for all glycerophosphocholines in  $m/z$  range 600 to 700, identified as described in Methods. DPI, days post-infection. LA, left atrium. RA, right atrium. LVT, left ventricle top. LVB, left ventricle bottom. RVT, right ventricle top. RVB, right ventricle bottom. Red line, p-value < 0.05 by Mann-Whitney U test, two-sided, FDR-corrected. Boxplots represent median, upper and lower quartiles, with whiskers extending to show the rest of the distribution, except for points that are determined to be outliers by being beyond the interquartile range  $\pm 1.5$  times the interquartile range. N=15 mice per group and per position. Source data are provided as a Source Data file.

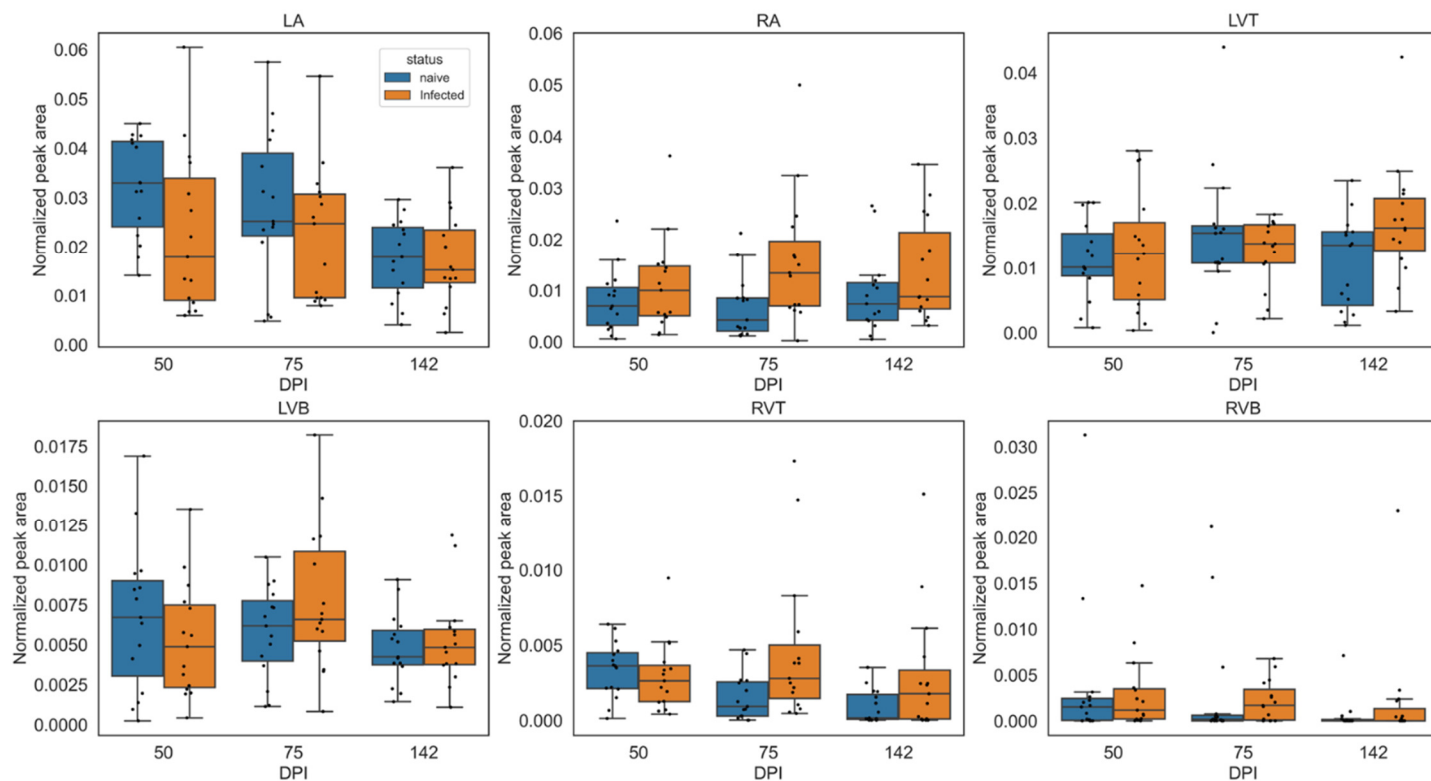

**Supplementary Figure 20. Impact of infection duration on glycerophosphocholines in  $m/z$  range 700 to 800.** Data represents summed peak areas for all glycerophosphocholines in  $m/z$  range 700 to 800, identified as described in Methods. DPI, days post-infection. LA, left atrium. RA, right atrium. LVT, left ventricle top. LVB, left ventricle bottom. RVT, right ventricle top. RVB, right ventricle bottom. Red line, p-value  $< 0.05$  by Mann-Whitney U test, two-sided, FDR-corrected. Boxplots represent median, upper and lower quartiles, with whiskers extending to show the rest of the distribution, except for points that are determined to be outliers by being beyond the interquartile range  $\pm 1.5$  times the interquartile range. N=15 mice per group and per position. Source data are provided as a Source Data file.

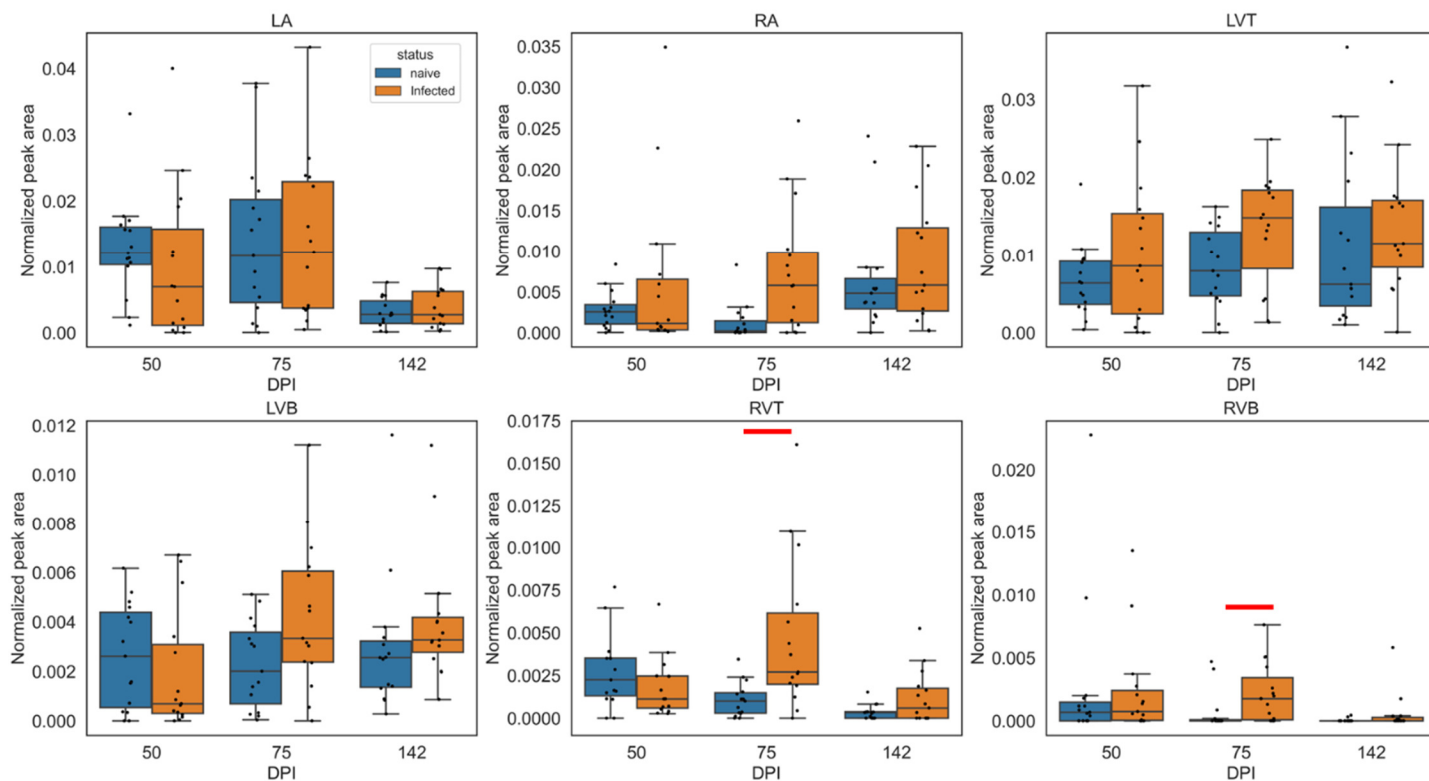

**Supplementary Figure 21. Impact of infection duration on glycerophosphocholines in  $m/z$  range 800 to 900.** Data represents summed peak areas for all glycerophosphocholines in  $m/z$  range 800 to 900, identified as described in Methods. DPI, days post-infection. LA, left atrium. RA, right atrium. LVT, left ventricle top. LVB, left ventricle bottom. RVT, right ventricle top. RVB, right ventricle bottom. Red line,  $p$ -value  $< 0.05$  by Mann-Whitney U test, two-sided, FDR-corrected. Boxplots represent median, upper and lower quartiles, with whiskers extending to show the rest of the distribution, except for points that are determined to be outliers by being beyond the interquartile range  $\pm 1.5$  times the interquartile range.  $N=15$  mice per group and per position. Source data are provided as a Source Data file.

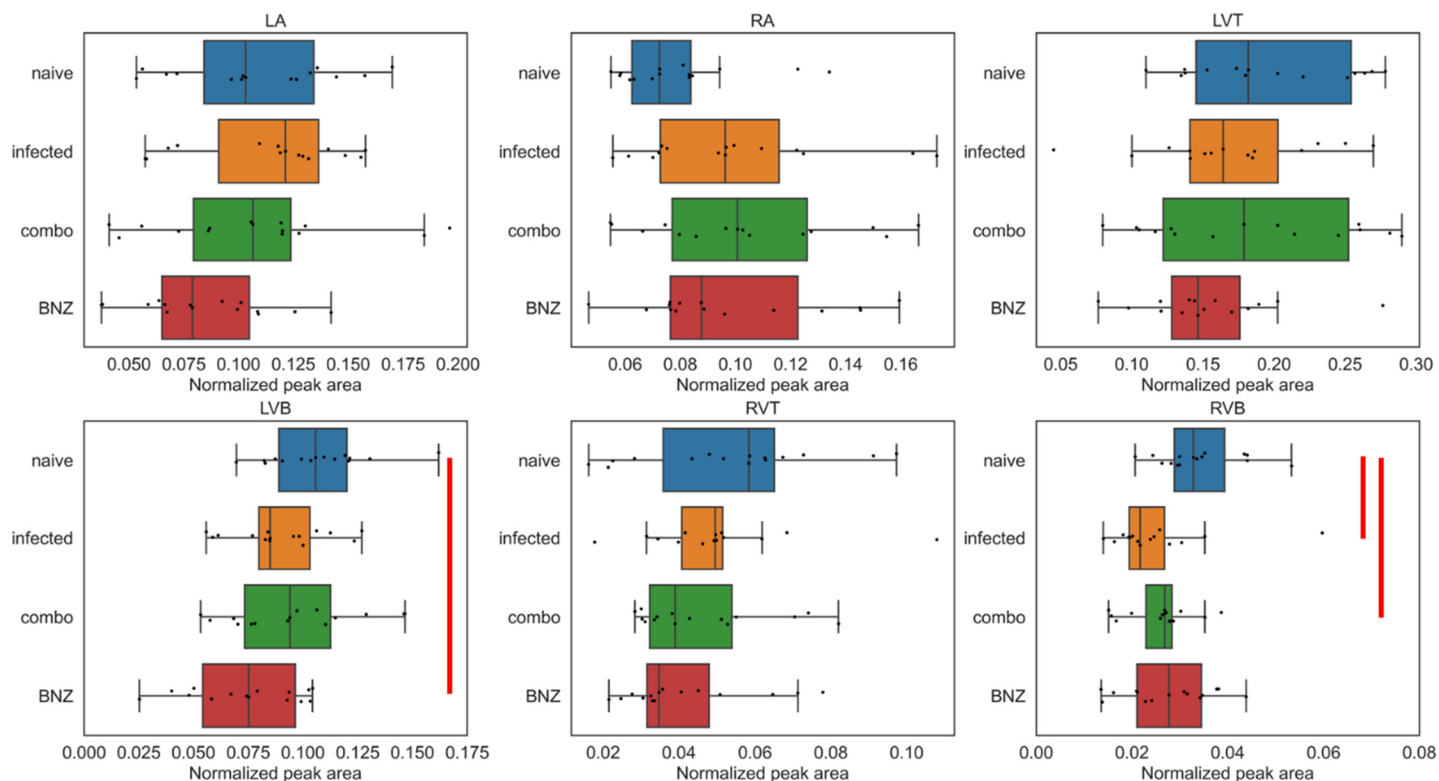

**Supplementary Figure 22. Impact of treatment on total glycerophosphocholines.** Data represents summed peak areas for all glycerophosphocholines, identified as described in Methods. Red line, p-value < 0.05 by Mann-Whitney U test, two-sided, FDR-corrected. Boxplots represent median, upper and lower quartiles, with whiskers extending to show the rest of the distribution, except for points that are determined to be outliers by being beyond the interquartile range +/- 1.5 times the interquartile range. LA, left atrium. RA, right atrium. LVT, left ventricle top. LVB, left ventricle bottom. RVT, right ventricle top. RVB, right ventricle bottom. BNZ, benznidazole. N=15 mice per group and per position. Source data are provided as a Source Data file.

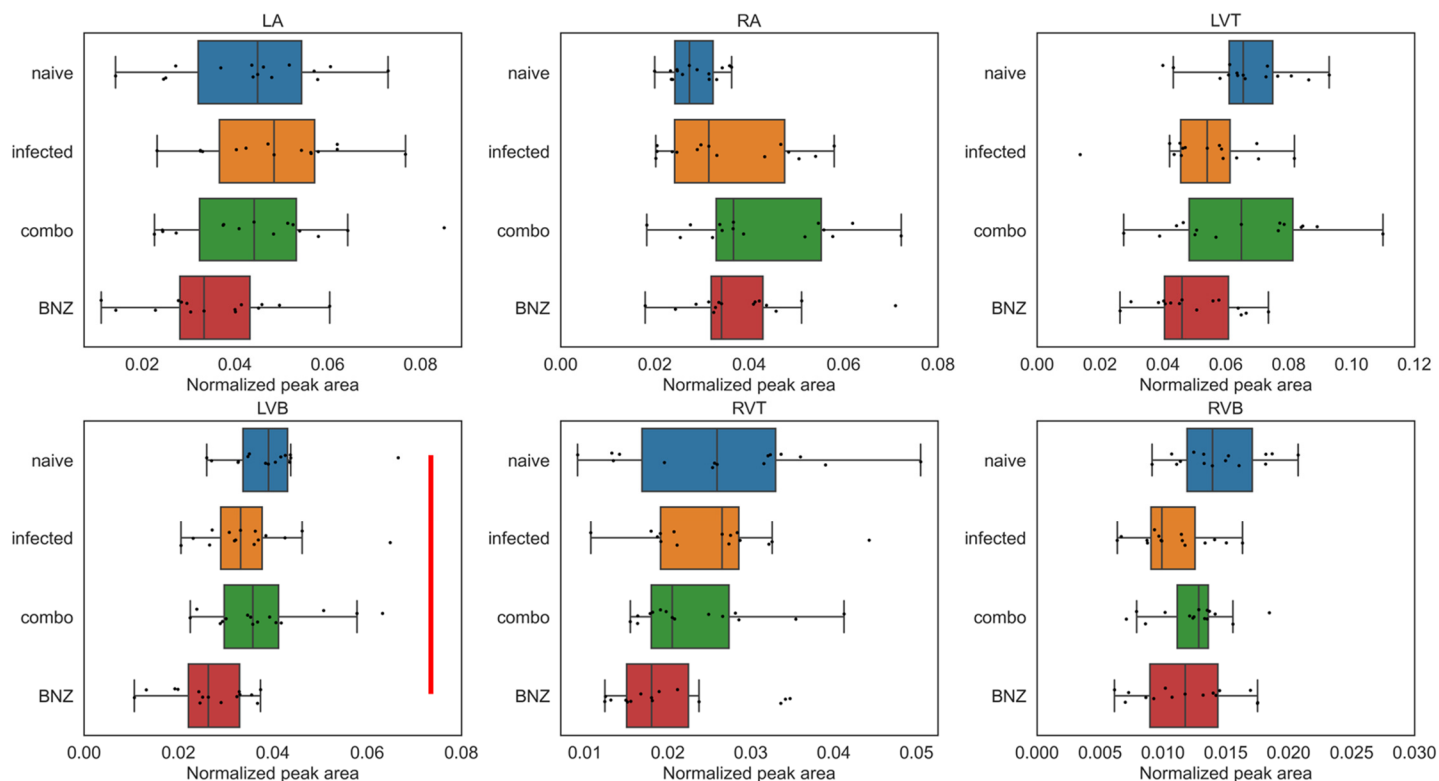

**Supplementary Figure 23. Impact of treatment on glycerophosphocholines in  $m/z$  range 400 to 500.**

Data represents summed peak areas for glycerophosphocholines in  $m/z$  range 400 to 500, identified as described in Methods. Red line, p-value < 0.05 by Mann-Whitney U test, two-sided, FDR-corrected. Boxplots represent median, upper and lower quartiles, with whiskers extending to show the rest of the distribution, except for points that are determined to be outliers by being beyond the interquartile range  $\pm 1.5$  times the interquartile range. LA, left atrium. RA, right atrium. LVT, left ventricle top. LVB, left ventricle bottom. RVT, right ventricle top. RVB, right ventricle bottom. BNZ, benznidazole. N=15 mice per group and per position. Source data are provided as a Source Data file.

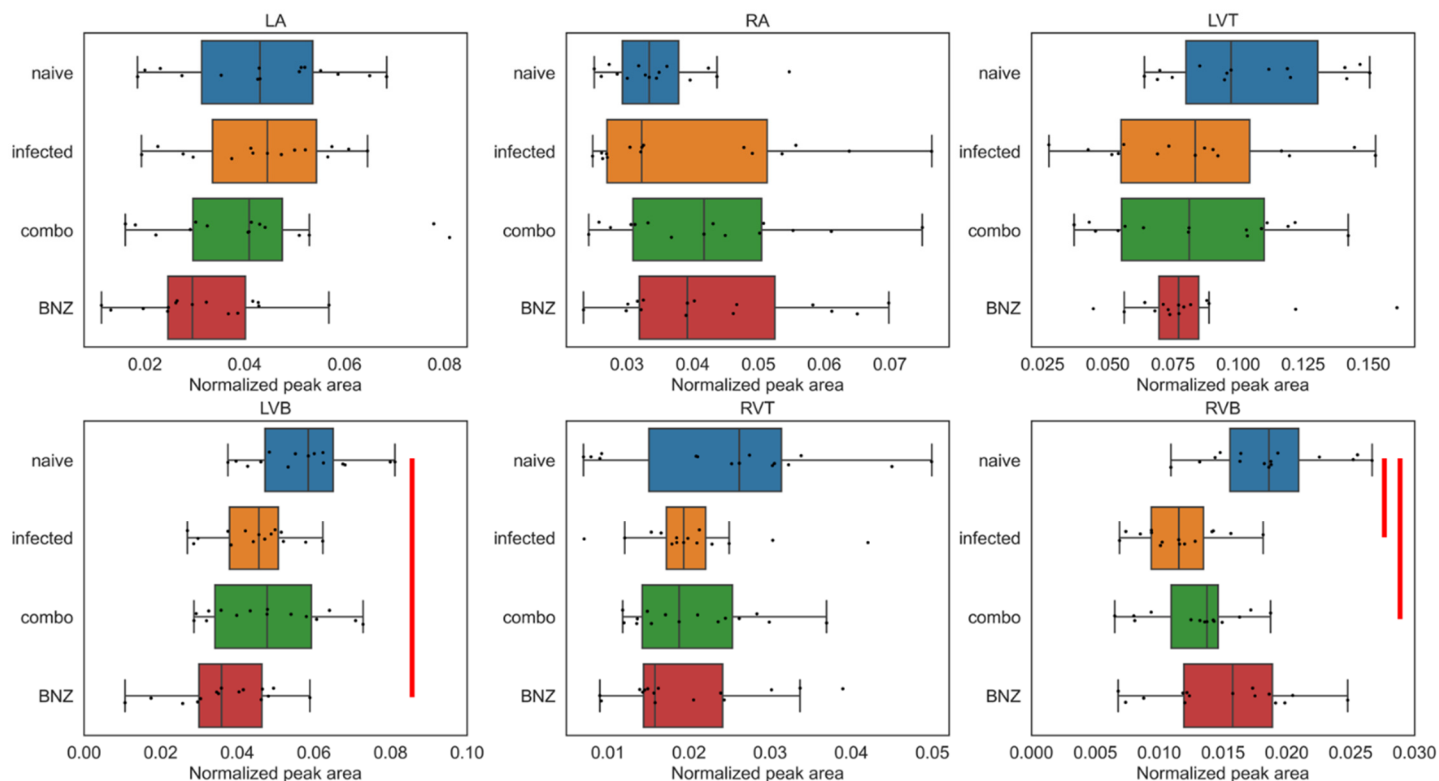

**Supplementary Figure 24. Impact of treatment on glycerophosphocholines in  $m/z$  range 500 to 600.**

Data represents summed peak areas for glycerophosphocholines in  $m/z$  range 500 to 600, identified as described in Methods. Red line, p-value < 0.05 by Mann-Whitney U test, two-sided, FDR-corrected. Boxplots represent median, upper and lower quartiles, with whiskers extending to show the rest of the distribution, except for points that are determined to be outliers by being beyond the interquartile range  $\pm 1.5$  times the interquartile range. LA, left atrium. RA, right atrium. LVT, left ventricle top. LVB, left ventricle bottom. RVT, right ventricle top. RVB, right ventricle bottom. BNZ, benznidazole. N=15 mice per group and per position. Source data are provided as a Source Data file.

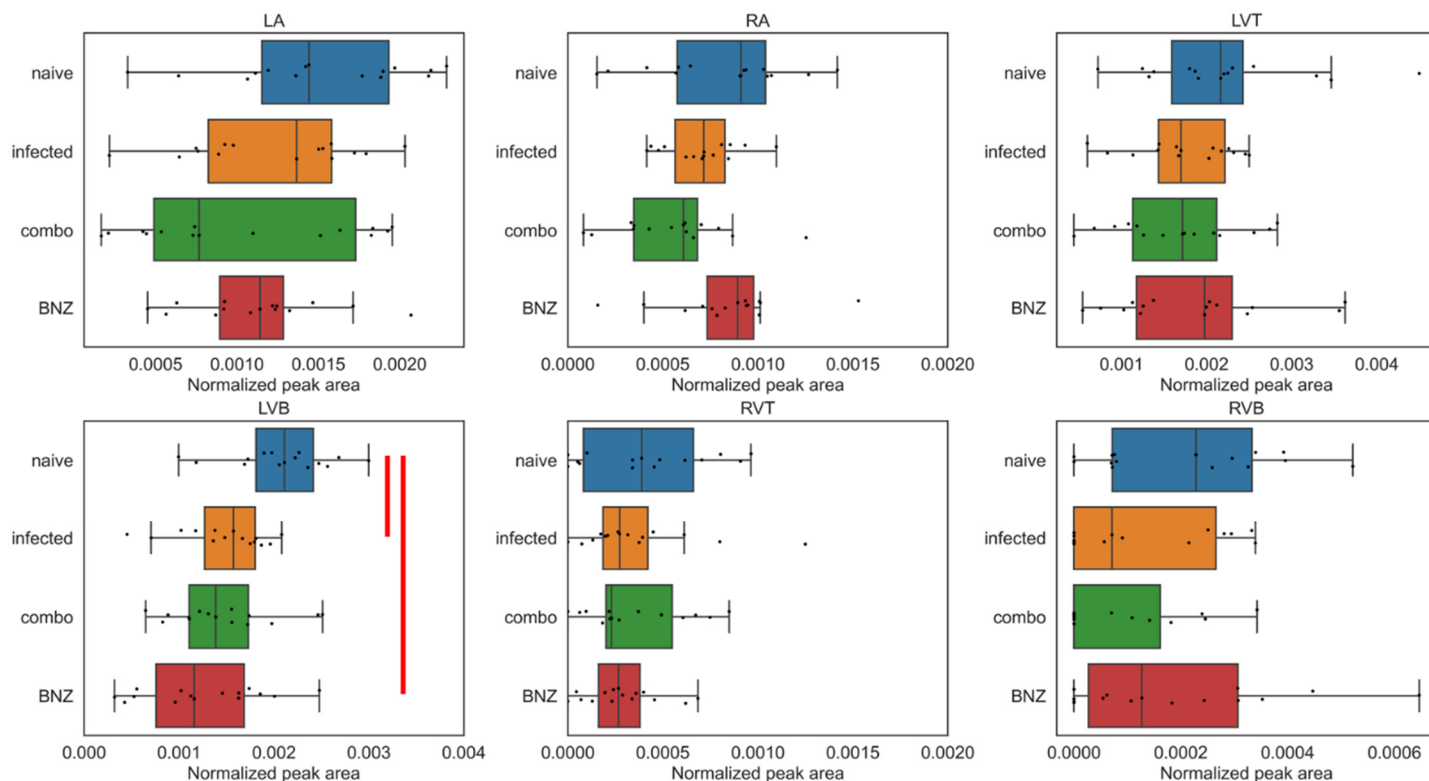

**Supplementary Figure 25. Impact of treatment on glycerophosphocholines in  $m/z$  range 600 to 700.**

Data represents summed peak areas for glycerophosphocholines in  $m/z$  range 600 to 700, identified as described in Methods. Red line, p-value < 0.05 by Mann-Whitney U test, two-sided, FDR-corrected. Boxplots represent median, upper and lower quartiles, with whiskers extending to show the rest of the distribution, except for points that are determined to be outliers by being beyond the interquartile range  $\pm 1.5$  times the interquartile range. LA, left atrium. RA, right atrium. LVT, left ventricle top. LVB, left ventricle bottom. RVT, right ventricle top. RVB, right ventricle bottom. BNZ, benznidazole. N=15 mice per group and per position. Source data are provided as a Source Data file.

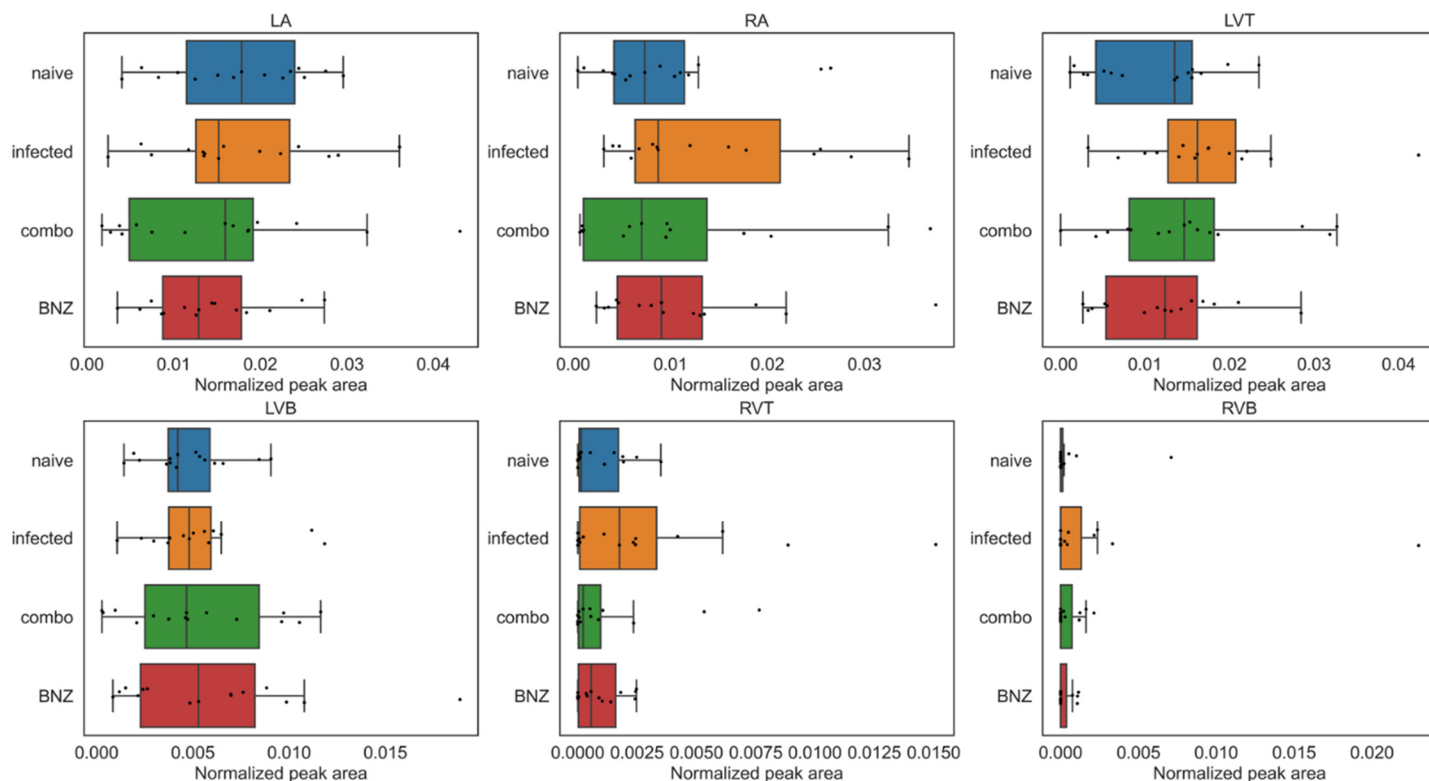

**Supplementary Figure 26. Impact of treatment on glycerophosphocholines in  $m/z$  range 700 to 800.**

Data represents summed peak areas for glycerophosphocholines in  $m/z$  range 700 to 800, identified as described in Methods. Red line, p-value < 0.05 by Mann-Whitney U test, two-sided, FDR-corrected. Boxplots represent median, upper and lower quartiles, with whiskers extending to show the rest of the distribution, except for points that are determined to be outliers by being beyond the interquartile range  $\pm 1.5$  times the interquartile range. LA, left atrium. RA, right atrium. LVT, left ventricle top. LVB, left ventricle bottom. RVT, right ventricle top. RVB, right ventricle bottom. BNZ, benznidazole. N=15 mice per group and per position. Source data are provided as a Source Data file.

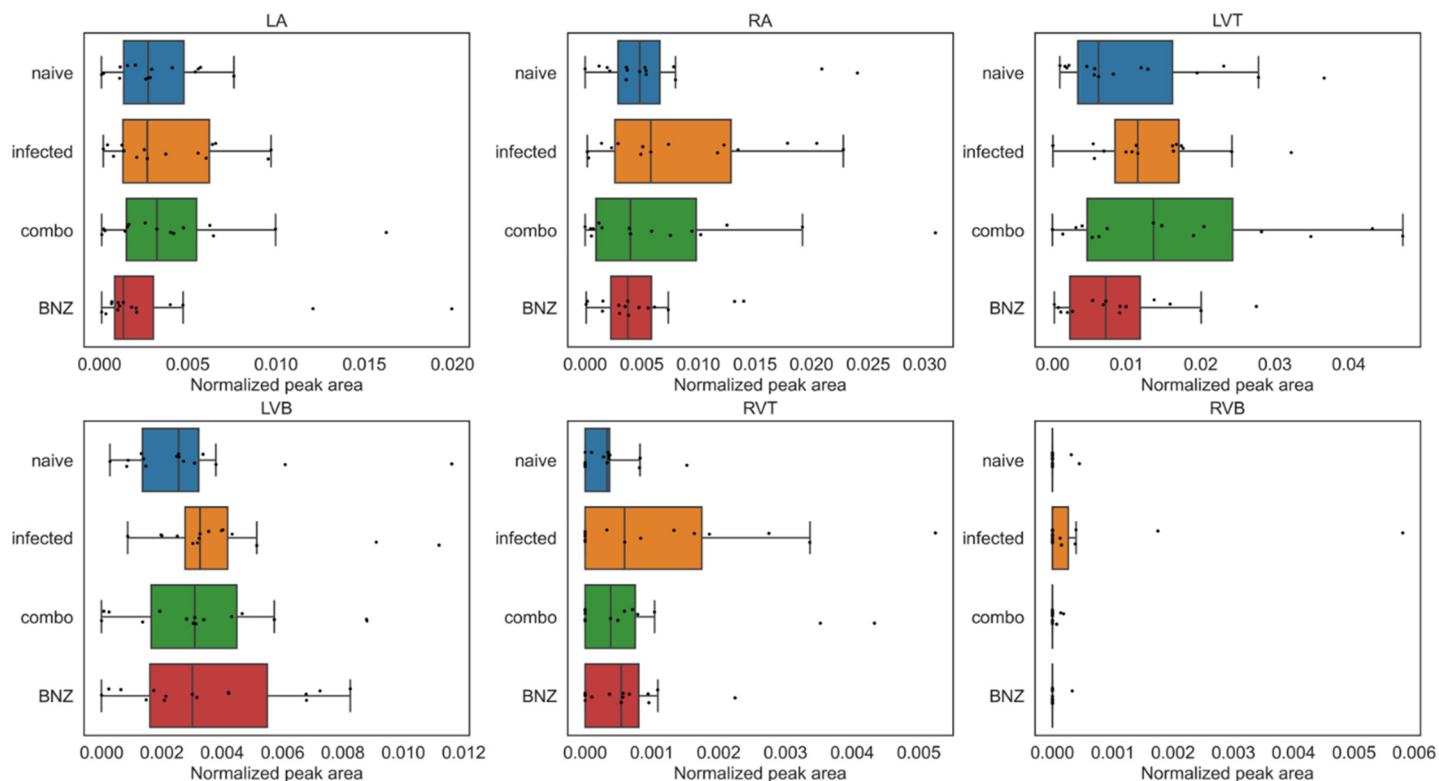

**Supplementary Figure 27. Impact of treatment on glycerophosphocholines in  $m/z$  range 800 to 900.**

Data represents summed peak areas for glycerophosphocholines in  $m/z$  range 800 to 900, identified as described in Methods. Red line, p-value < 0.05 by Mann-Whitney U test, two-sided, FDR-corrected. Boxplots represent median, upper and lower quartiles, with whiskers extending to show the rest of the distribution, except for points that are determined to be outliers by being beyond the interquartile range  $\pm 1.5$  times the interquartile range. LA, left atrium. RA, right atrium. LVT, left ventricle top. LVB, left ventricle bottom. RVT, right ventricle top. RVB, right ventricle bottom. BNZ, benznidazole. N=15 mice per group and per position. Source data are provided as a Source Data file.

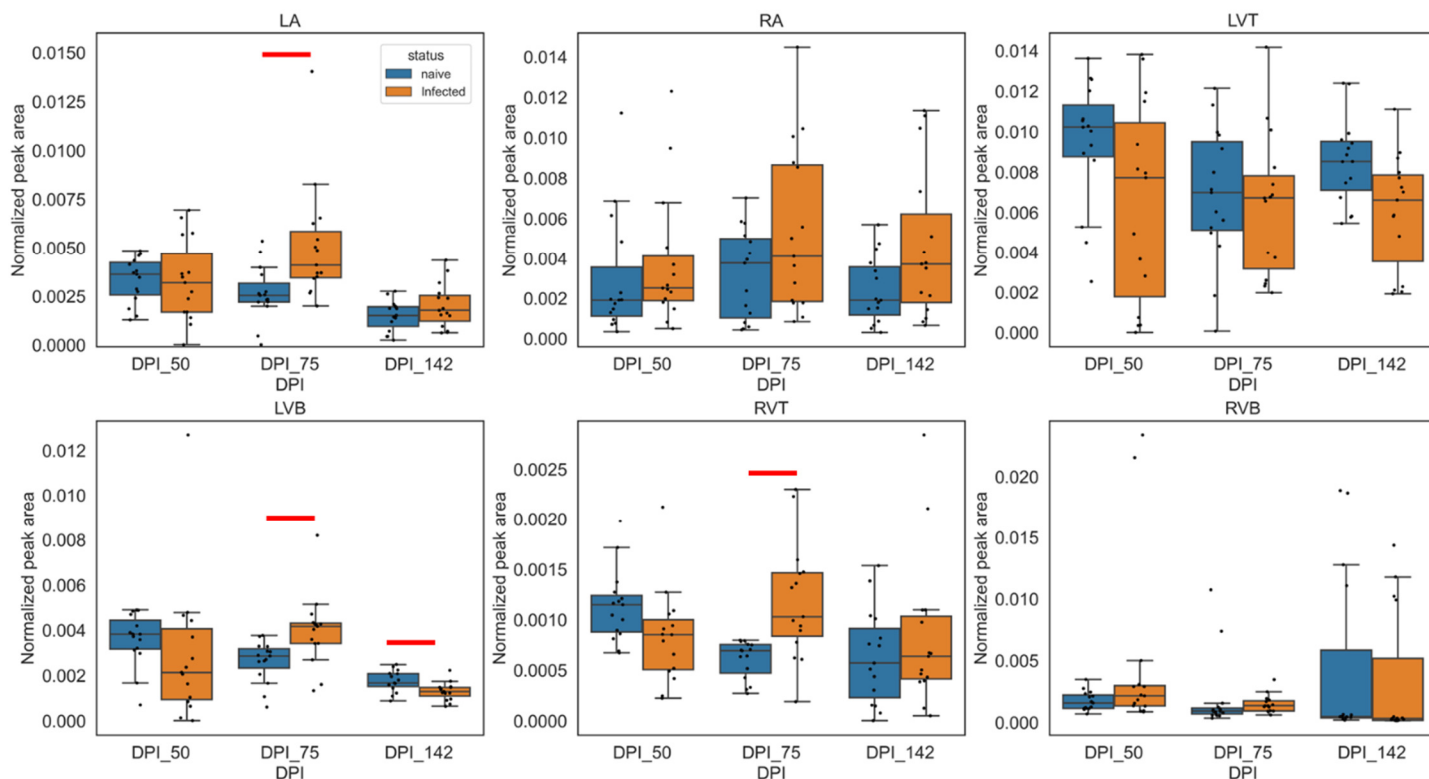

**Supplementary Figure 28. Impact of infection duration on glycerophosphoethanolamines in  $m/z$  range 400 to 500.** Data represents summed peak areas for all glycerophosphoethanolamines in  $m/z$  range 400 to 500, identified as described in Methods. DPI, days post-infection. LA, left atrium. RA, right atrium. LVT, left ventricle top. LVB, left ventricle bottom. RVT, right ventricle top. RVB, right ventricle bottom. Red line,  $p$ -value  $< 0.05$  by Mann-Whitney U test, two-sided, FDR-corrected. Boxplots represent median, upper and lower quartiles, with whiskers extending to show the rest of the distribution, except for points that are determined to be outliers by being beyond the interquartile range  $\pm 1.5$  times the interquartile range.  $N=15$  mice per group and per position. Source data are provided as a Source Data file.

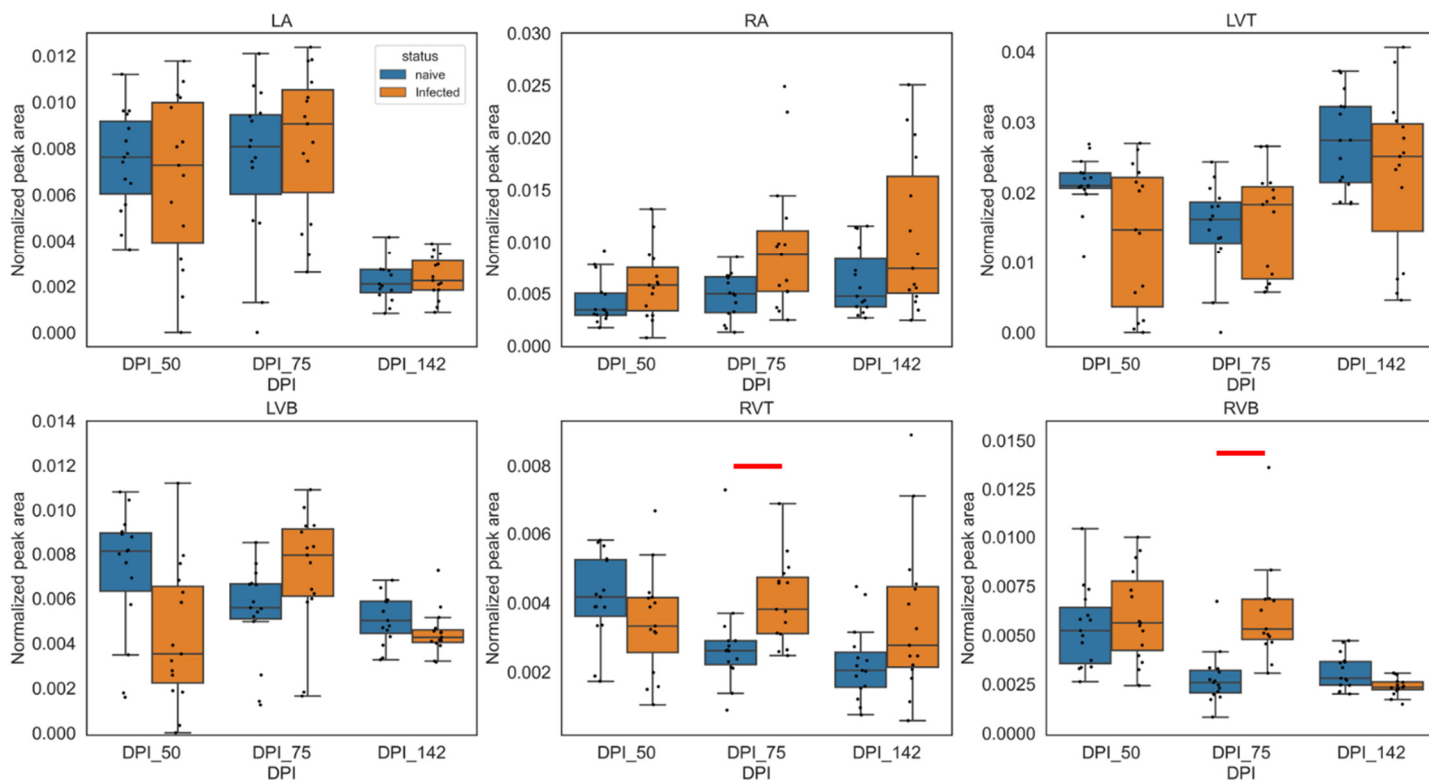

**Supplementary Figure 29. Impact of infection duration on glycerophosphoethanolamines in  $m/z$  range 500 to 600.** Data represents summed peak areas for all glycerophosphoethanolamines in  $m/z$  range 500 to 600, identified as described in Methods. DPI, days post-infection. LA, left atrium. RA, right atrium. LVT, left ventricle top. LVB, left ventricle bottom. RVT, right ventricle top. RVB, right ventricle bottom. Red line, p-value < 0.05 by Mann-Whitney U test, two-sided, FDR-corrected. Boxplots represent median, upper and lower quartiles, with whiskers extending to show the rest of the distribution, except for points that are determined to be outliers by being beyond the interquartile range  $\pm 1.5$  times the interquartile range. N=15 mice per group and per position. Source data are provided as a Source Data file.

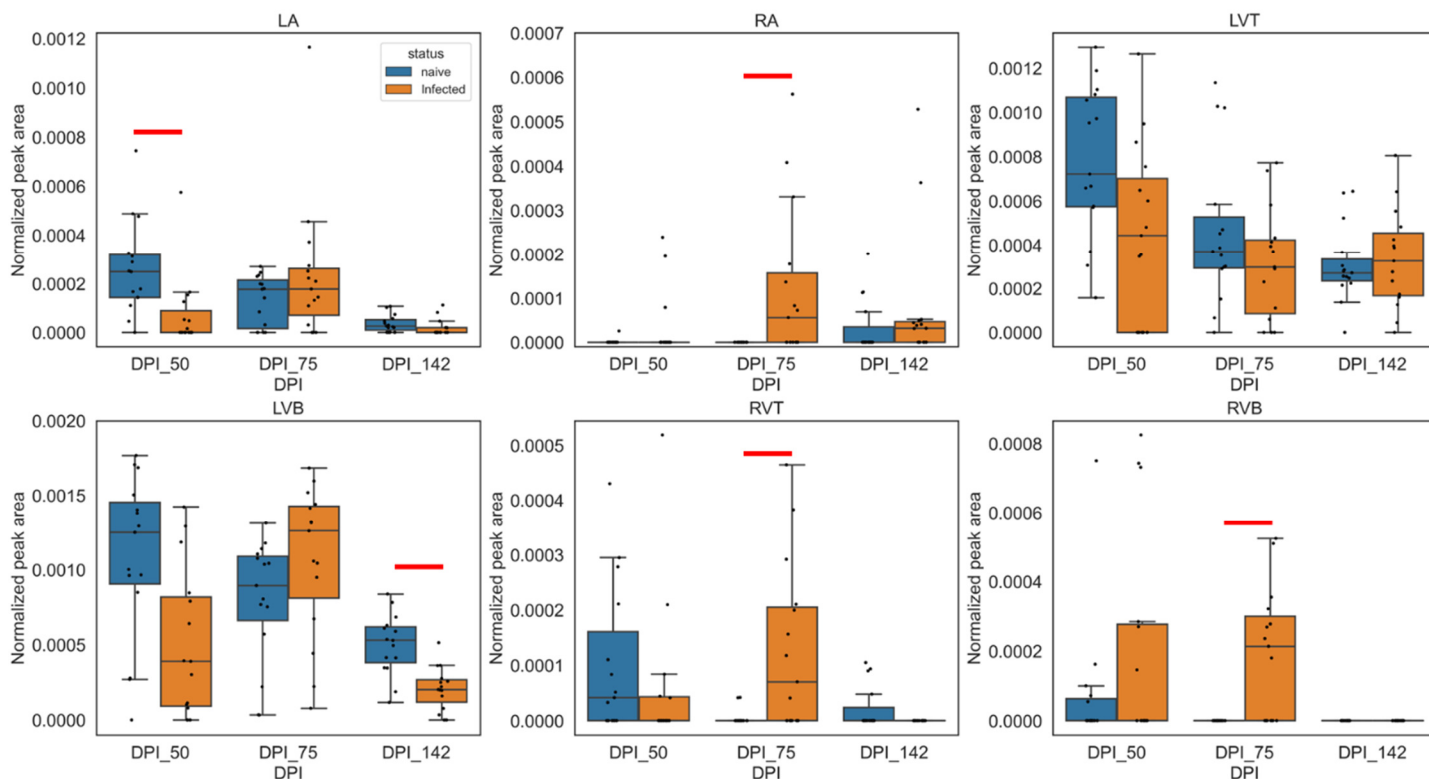

**Supplementary Figure 30. Impact of infection duration on glycerophosphoethanolamines in  $m/z$  range 600 to 700.** Data represents summed peak areas for all glycerophosphoethanolamines in  $m/z$  range 600 to 700, identified as described in Methods. DPI, days post-infection. LA, left atrium. RA, right atrium. LVT, left ventricle top. LVB, left ventricle bottom. RVT, right ventricle top. RVB, right ventricle bottom. Red line, p-value < 0.05 by Mann-Whitney U test, two-sided, FDR-corrected. Boxplots represent median, upper and lower quartiles, with whiskers extending to show the rest of the distribution, except for points that are determined to be outliers by being beyond the interquartile range  $\pm 1.5$  times the interquartile range. N=15 mice per group and per position. Source data are provided as a Source Data file.

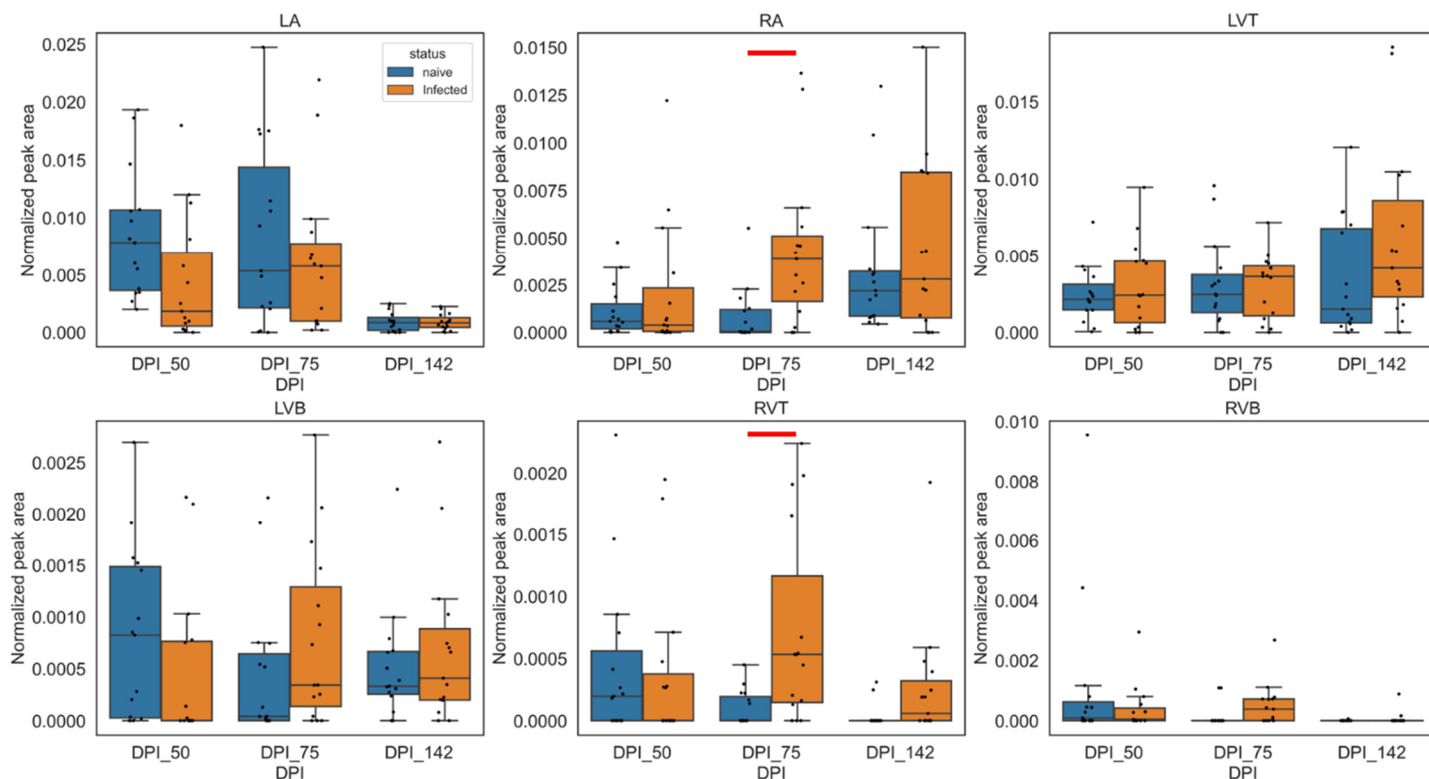

**Supplementary Figure 31. Impact of infection duration on glycerophosphoethanolamines in  $m/z$  range 700 to 800.** Data represents summed peak areas for all glycerophosphoethanolamines in  $m/z$  range 700 to 800, identified as described in Methods. DPI, days post-infection. LA, left atrium. RA, right atrium. LVT, left ventricle top. LVB, left ventricle bottom. RVT, right ventricle top. RVB, right ventricle bottom. Red line,  $p$ -value  $< 0.05$  by Mann-Whitney U test, two-sided, FDR-corrected. Boxplots represent median, upper and lower quartiles, with whiskers extending to show the rest of the distribution, except for points that are determined to be outliers by being beyond the interquartile range  $\pm 1.5$  times the interquartile range.  $N=15$  mice per group and per position. Source data are provided as a Source Data file.

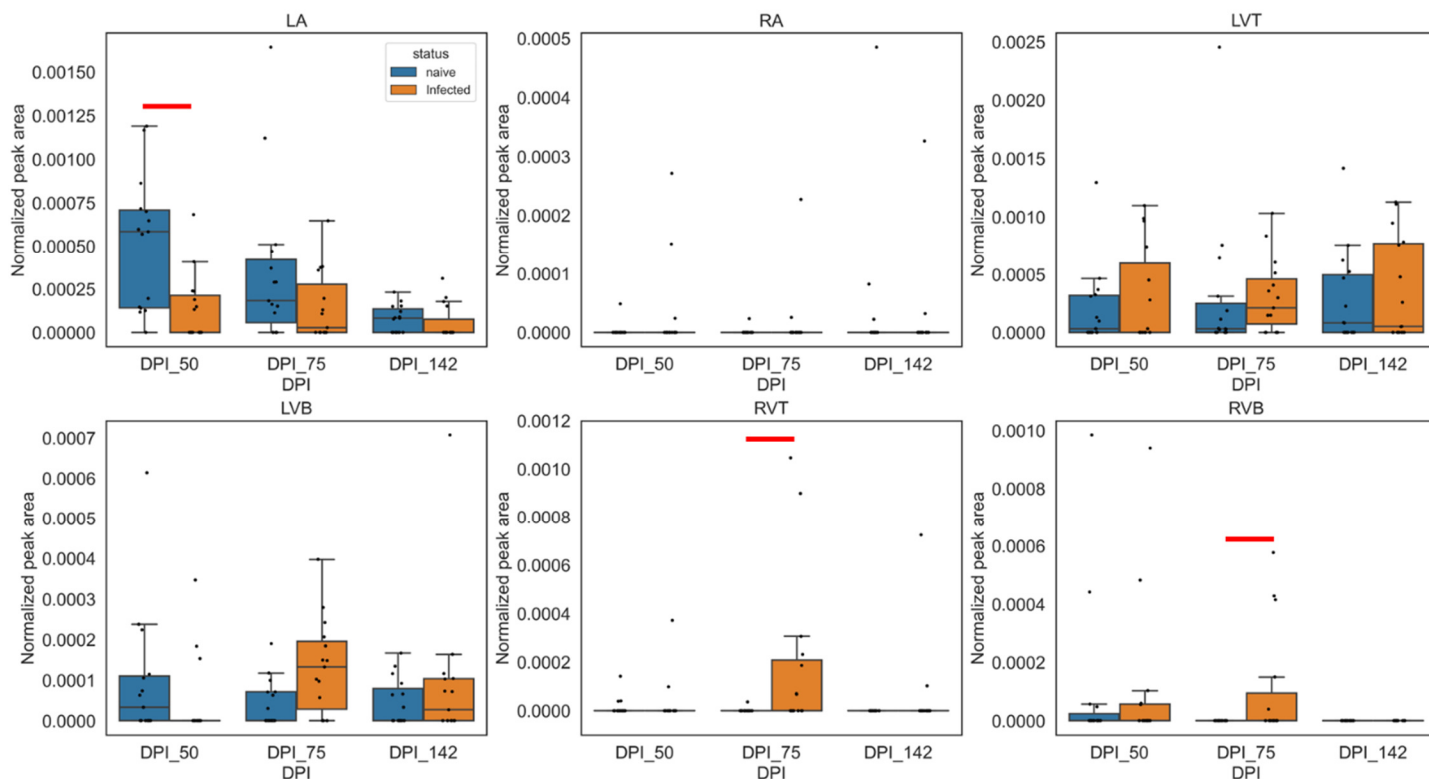

**Supplementary Figure 32. Impact of infection duration on glycerophosphoethanolamines in  $m/z$  range 800 to 900.** Data represents summed peak areas for all glycerophosphoethanolamines in  $m/z$  range 800 to 900, identified as described in Methods. DPI, days post-infection. LA, left atrium. RA, right atrium. LVT, left ventricle top. LVB, left ventricle bottom. RVT, right ventricle top. RVB, right ventricle bottom. Red line,  $p$ -value  $< 0.05$  by Mann-Whitney U test, two-sided, FDR-corrected. Boxplots represent median, upper and lower quartiles, with whiskers extending to show the rest of the distribution, except for points that are determined to be outliers by being beyond the interquartile range  $\pm 1.5$  times the interquartile range.  $N=15$  mice per group and per position. Source data are provided as a Source Data file.

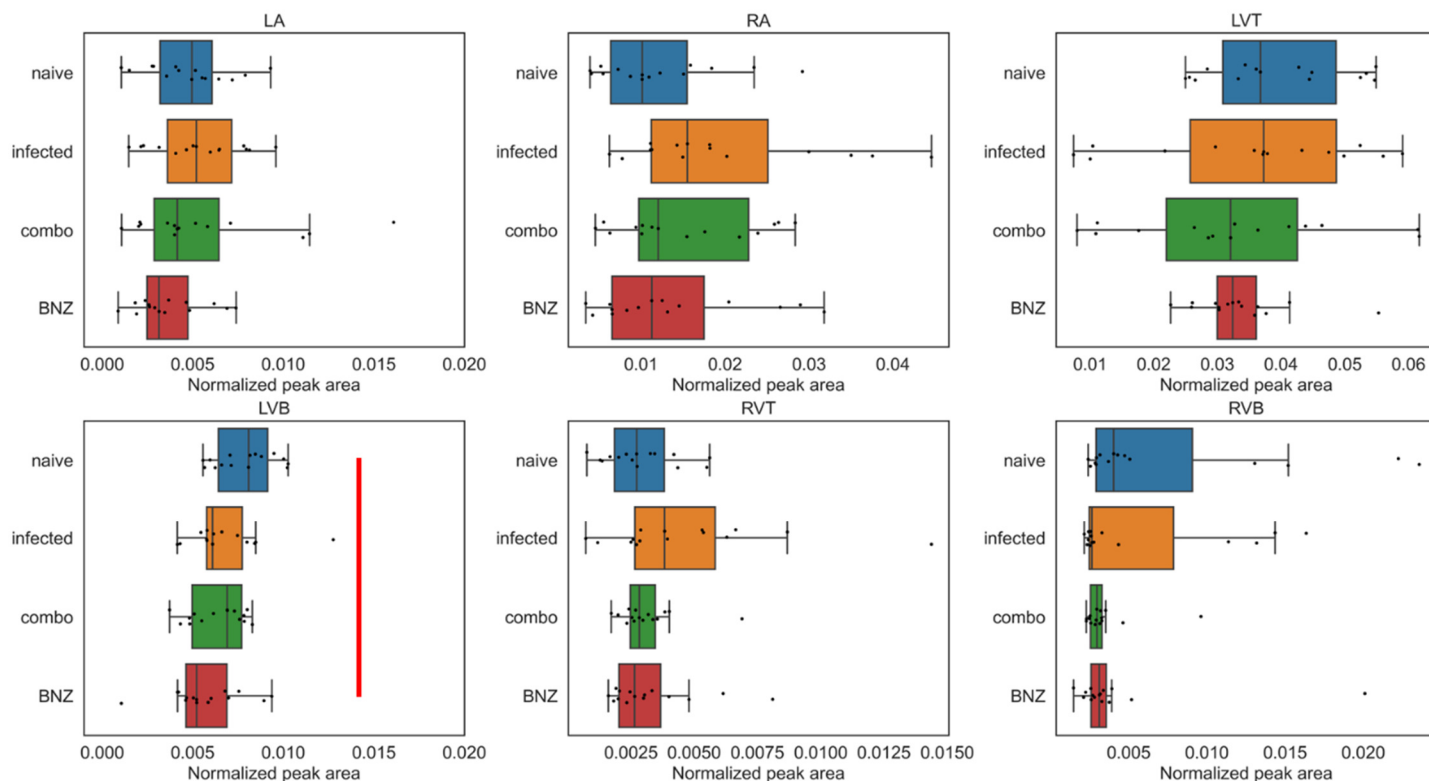

**Supplementary Figure 33. Impact of treatment on total glycerophosphoethanolamines.** Data represents summed peak areas for all glycerophosphoethanolamines, identified as described in Methods. Red line, p-value < 0.05 by Mann-Whitney U test, two-sided, FDR-corrected. Boxplots represent median, upper and lower quartiles, with whiskers extending to show the rest of the distribution, except for points that are determined to be outliers by being beyond the interquartile range  $\pm 1.5$  times the interquartile range. LA, left atrium. RA, right atrium. LVT, left ventricle top. LVB, left ventricle bottom. RVT, right ventricle top. RVB, right ventricle bottom. BNZ, benznidazole. N=15 mice per group and per position. Source data are provided as a Source Data file.

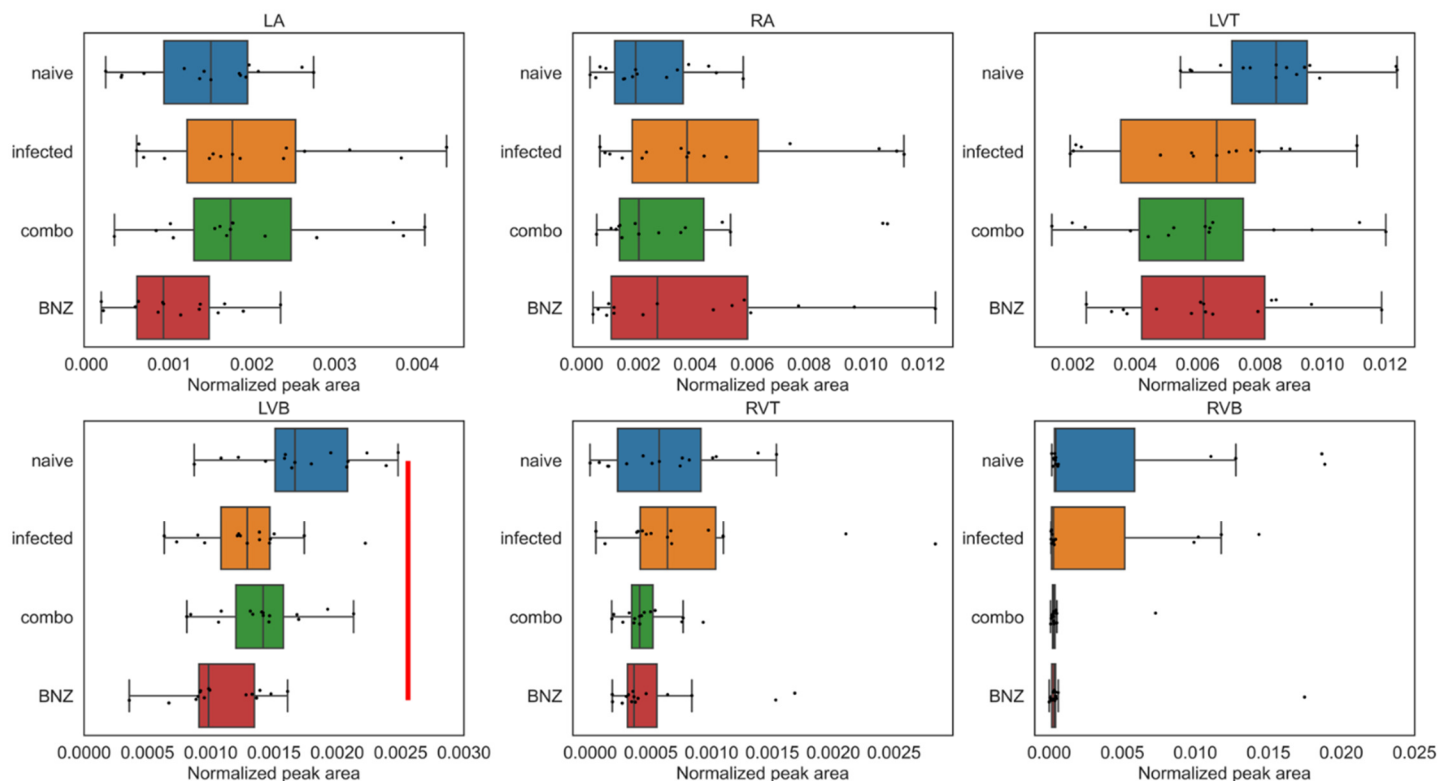

**Supplementary Figure 34. Impact of treatment on glycerophosphoethanolamines in  $m/z$  range 400 to 500.** Data represents summed peak areas for glycerophosphoethanolamines in  $m/z$  range 400 to 500, identified as described in Methods. Red line, p-value < 0.05 by Mann-Whitney U test, two-sided, FDR-corrected. Boxplots represent median, upper and lower quartiles, with whiskers extending to show the rest of the distribution, except for points that are determined to be outliers by being beyond the interquartile range  $\pm 1.5$  times the interquartile range. LA, left atrium. RA, right atrium. LVT, left ventricle top. LVB, left ventricle bottom. RVT, right ventricle top. RVB, right ventricle bottom. BNZ, benznidazole. N=15 mice per group and per position. Source data are provided as a Source Data file.

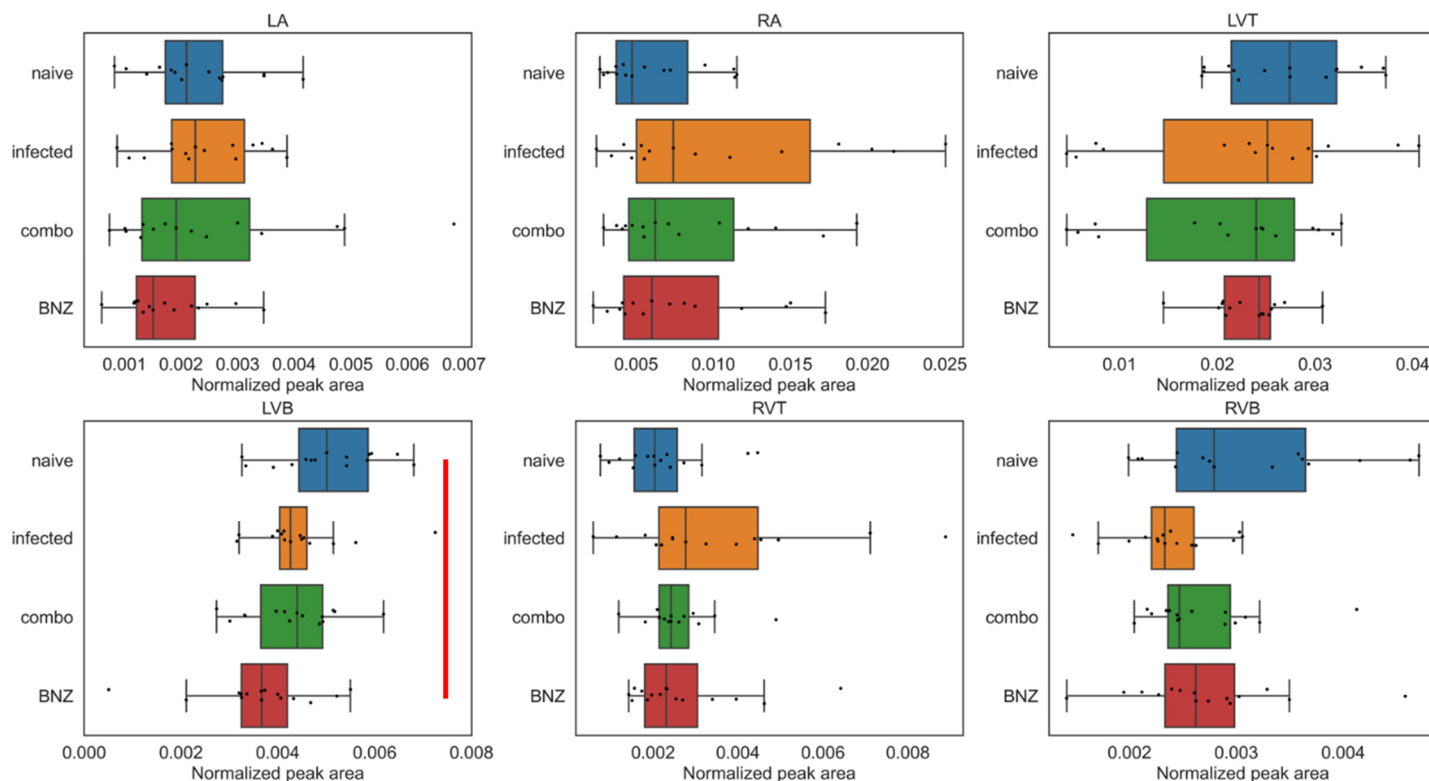

**Supplementary Figure 35. Impact of treatment on glycerophosphoethanolamines in  $m/z$  range 500 to 600.** Data represents summed peak areas for glycerophosphoethanolamines in  $m/z$  range 500 to 600, identified as described in Methods. Red line, p-value < 0.05 by Mann-Whitney U test, two-sided, FDR-corrected. Boxplots represent median, upper and lower quartiles, with whiskers extending to show the rest of the distribution, except for points that are determined to be outliers by being beyond the interquartile range  $\pm 1.5$  times the interquartile range. LA, left atrium. RA, right atrium. LVT, left ventricle top. LVB, left ventricle bottom. RVT, right ventricle top. RVB, right ventricle bottom. BNZ, benznidazole. N=15 mice per group and per position. Source data are provided as a Source Data file.

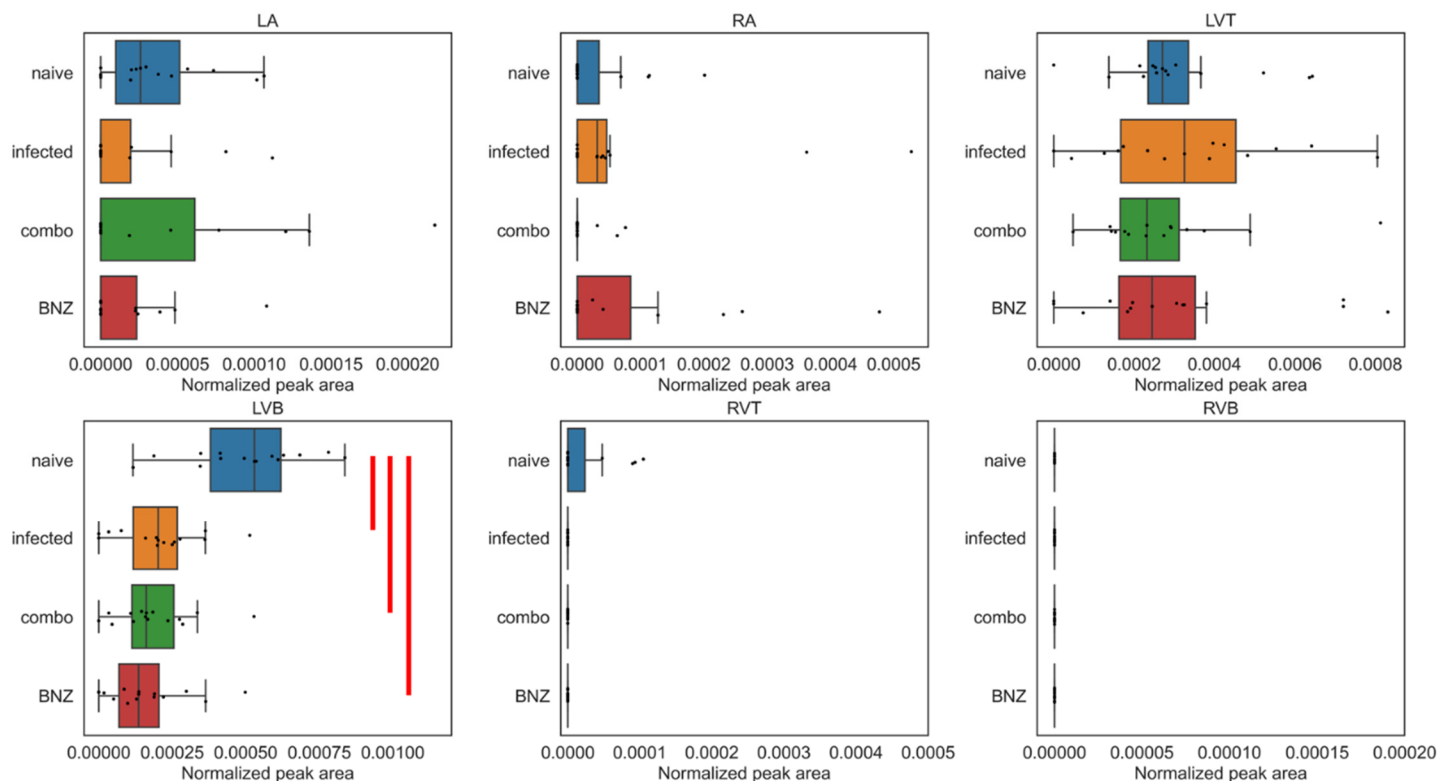

**Supplementary Figure 36. Impact of treatment on glycerophosphoethanolamines in  $m/z$  range 600 to 700.** Data represents summed peak areas for glycerophosphoethanolamines in  $m/z$  range 600 to 700, identified as described in Methods. Red line, p-value < 0.05 by Mann-Whitney U test, two-sided, FDR-corrected. Boxplots represent median, upper and lower quartiles, with whiskers extending to show the rest of the distribution, except for points that are determined to be outliers by being beyond the interquartile range  $\pm 1.5$  times the interquartile range. LA, left atrium. RA, right atrium. LVT, left ventricle top. LVB, left ventricle bottom. RVT, right ventricle top. RVB, right ventricle bottom. BNZ, benznidazole. N=15 mice per group and per position. Source data are provided as a Source Data file.

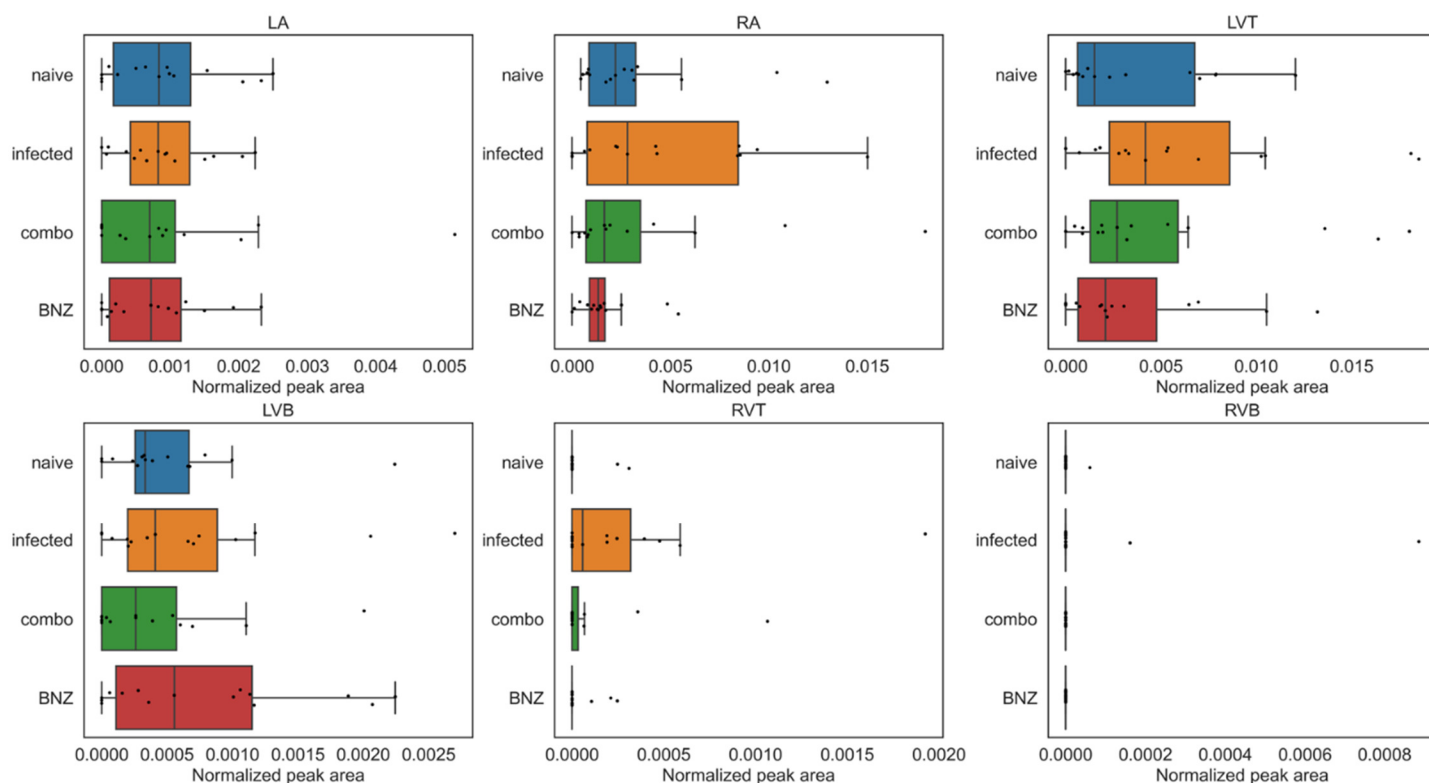

**Supplementary Figure 37. Impact of treatment on glycerophosphoethanolamines in  $m/z$  range 700 to 800.** Data represents summed peak areas for glycerophosphoethanolamines in  $m/z$  range 700 to 800, identified as described in Methods. Red line, p-value < 0.05 by Mann-Whitney U test, two-sided, FDR-corrected. Boxplots represent median, upper and lower quartiles, with whiskers extending to show the rest of the distribution, except for points that are determined to be outliers by being beyond the interquartile range  $\pm 1.5$  times the interquartile range. LA, left atrium. RA, right atrium. LVT, left ventricle top. LVB, left ventricle bottom. RVT, right ventricle top. RVB, right ventricle bottom. BNZ, benznidazole. N=15 mice per group and per position. Source data are provided as a Source Data file.

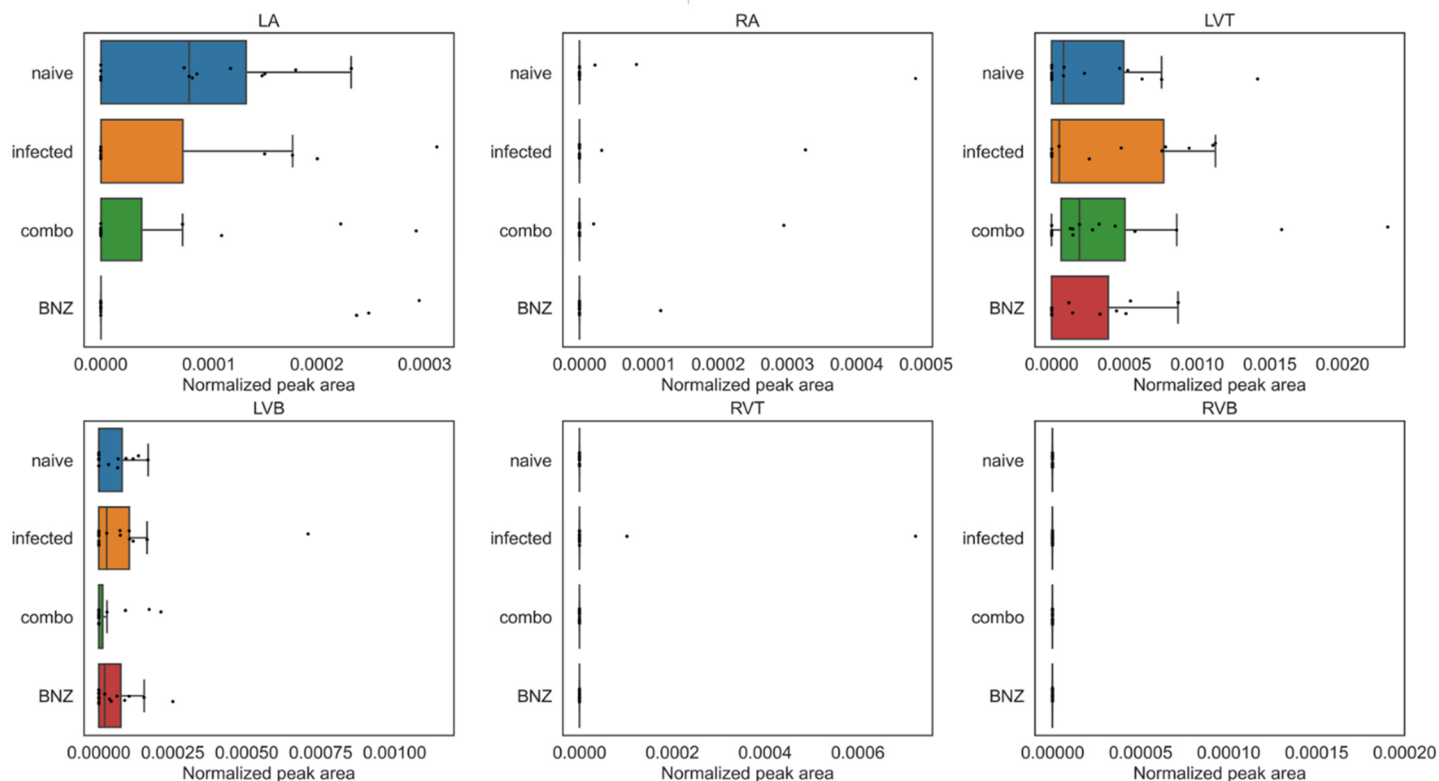

**Supplementary Figure 38. Impact of treatment on glycerophosphoethanolamines in  $m/z$  range 800 to 900.** Data represents summed peak areas for glycerophosphoethanolamines in  $m/z$  range 800 to 900, identified as described in Methods. Red line, p-value  $< 0.05$  by Mann-Whitney U test, two-sided, FDR-corrected. Boxplots represent median, upper and lower quartiles, with whiskers extending to show the rest of the distribution, except for points that are determined to be outliers by being beyond the interquartile range  $\pm 1.5$  times the interquartile range. LA, left atrium. RA, right atrium. LVT, left ventricle top. LVB, left ventricle bottom. RVT, right ventricle top. RVB, right ventricle bottom. BNZ, benznidazole. N=15 mice per group and per position. Source data are provided as a Source Data file.

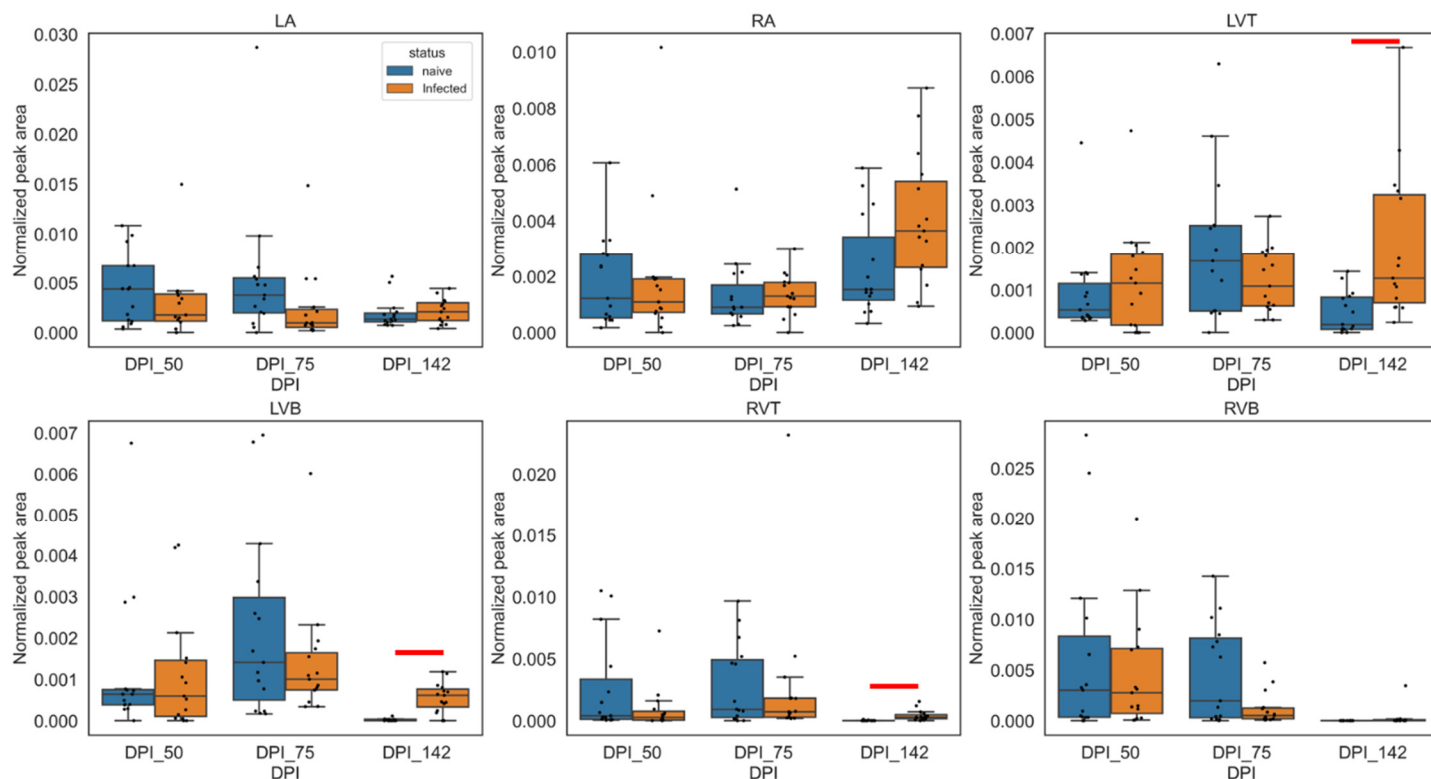

**Supplementary Figure 39. Impact of infection duration on long chain acylcarnitines.** Data represents summed peak areas for long chain acylcarnitines, identified as described in Methods. DPI, days post-infection. LA, left atrium. RA, right atrium. LVT, left ventricle top. LVB, left ventricle bottom. RVT, right ventricle top. RVB, right ventricle bottom. Red line, p-value < 0.05 by Mann-Whitney U test, two-sided, FDR-corrected. Boxplots represent median, upper and lower quartiles, with whiskers extending to show the rest of the distribution, except for points that are determined to be outliers by being beyond the interquartile range  $\pm 1.5$  times the interquartile range. N=15 mice per group and per position. Source data are provided as a Source Data file.

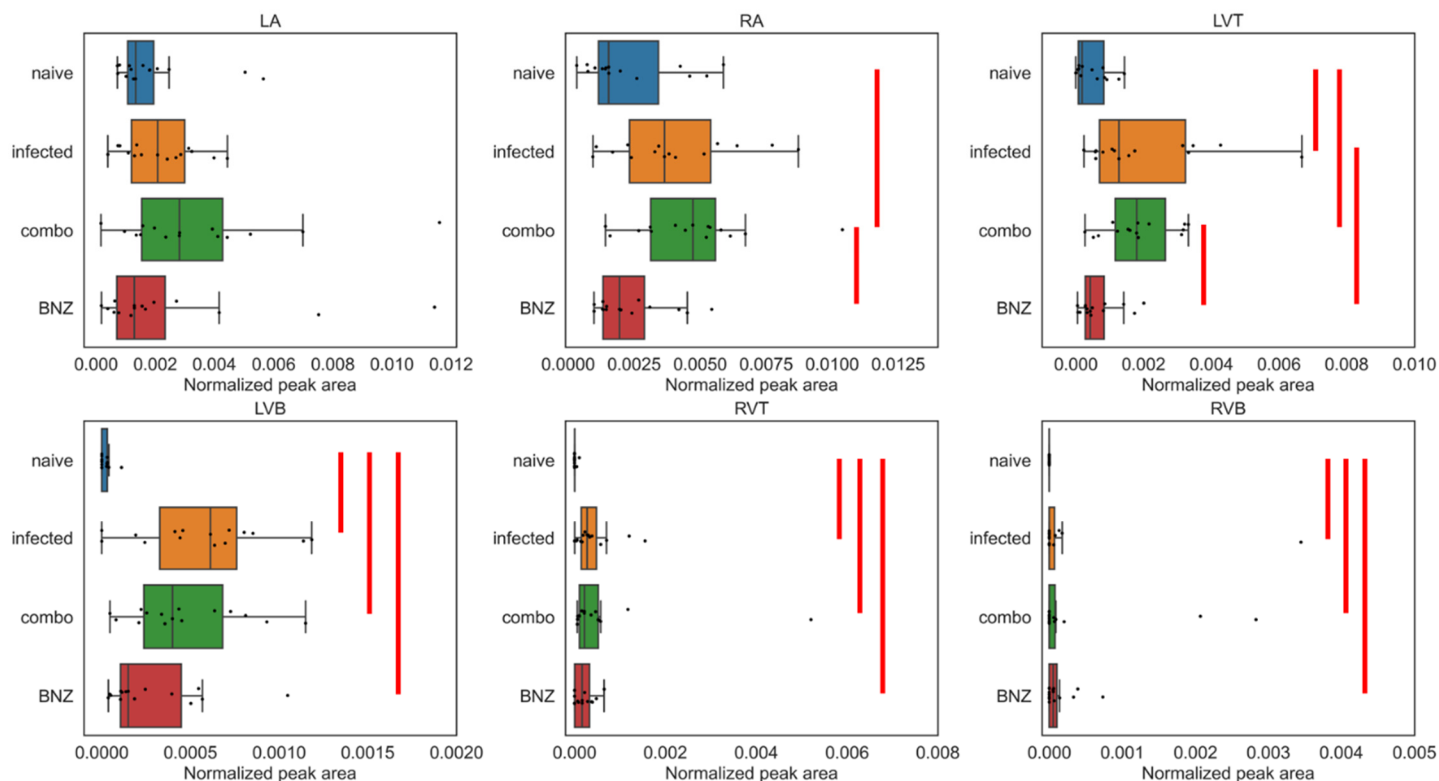

**Supplementary Figure 40. Impact of treatment on long chain acylcarnitines.** Data represents summed peak areas for long chain acylcarnitines, identified as described in Methods. Red line, p-value < 0.05 by Mann-Whitney U test, two-sided, FDR-corrected. Boxplots represent median, upper and lower quartiles, with whiskers extending to show the rest of the distribution, except for points that are determined to be outliers by being beyond the interquartile range  $\pm 1.5$  times the interquartile range. LA, left atrium. RA, right atrium. LVT, left ventricle top. LVB, left ventricle bottom. RVT, right ventricle top. RVB, right ventricle bottom. BNZ, benznidazole. N=15 mice per group and per position. Source data are provided as a Source Data file.

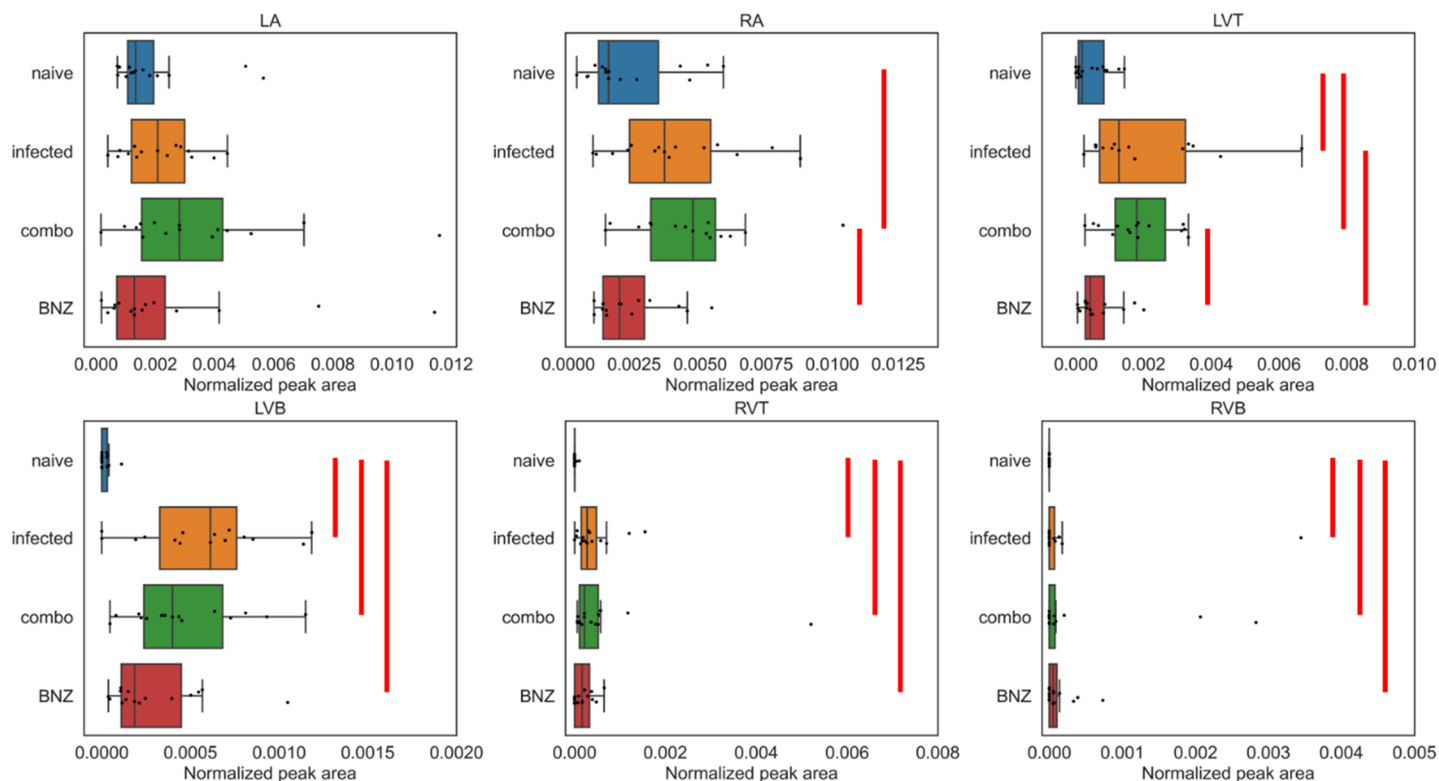

**Supplementary Figure 41. Impact of treatment on total acylcarnitines.** Data represents summed peak areas for total acylcarnitines, identified as described in Methods. Red line, p-value < 0.05 by Mann-Whitney U test, two-sided, FDR-corrected. Boxplots represent median, upper and lower quartiles, with whiskers extending to show the rest of the distribution, except for points that are determined to be outliers by being beyond the interquartile range  $\pm 1.5$  times the interquartile range. LA, left atrium. RA, right atrium. LVT, left ventricle top. LVB, left ventricle bottom. RVT, right ventricle top. RVB, right ventricle bottom. BNZ, benznidazole. N=15 mice per group and per position. Source data are provided as a Source Data file.

**Supplementary Figure 42. Heatmaps for treatment effects analysis, per heart position, clustering by features and by mouse.** Source data are provided as a Source Data file. N=15 mice per group and per position. LA, left atrium. RA, right atrium. LVT, left ventricle top. RVT, right ventricle top. LVB, left ventricle bottom. RVB, right ventricle bottom.

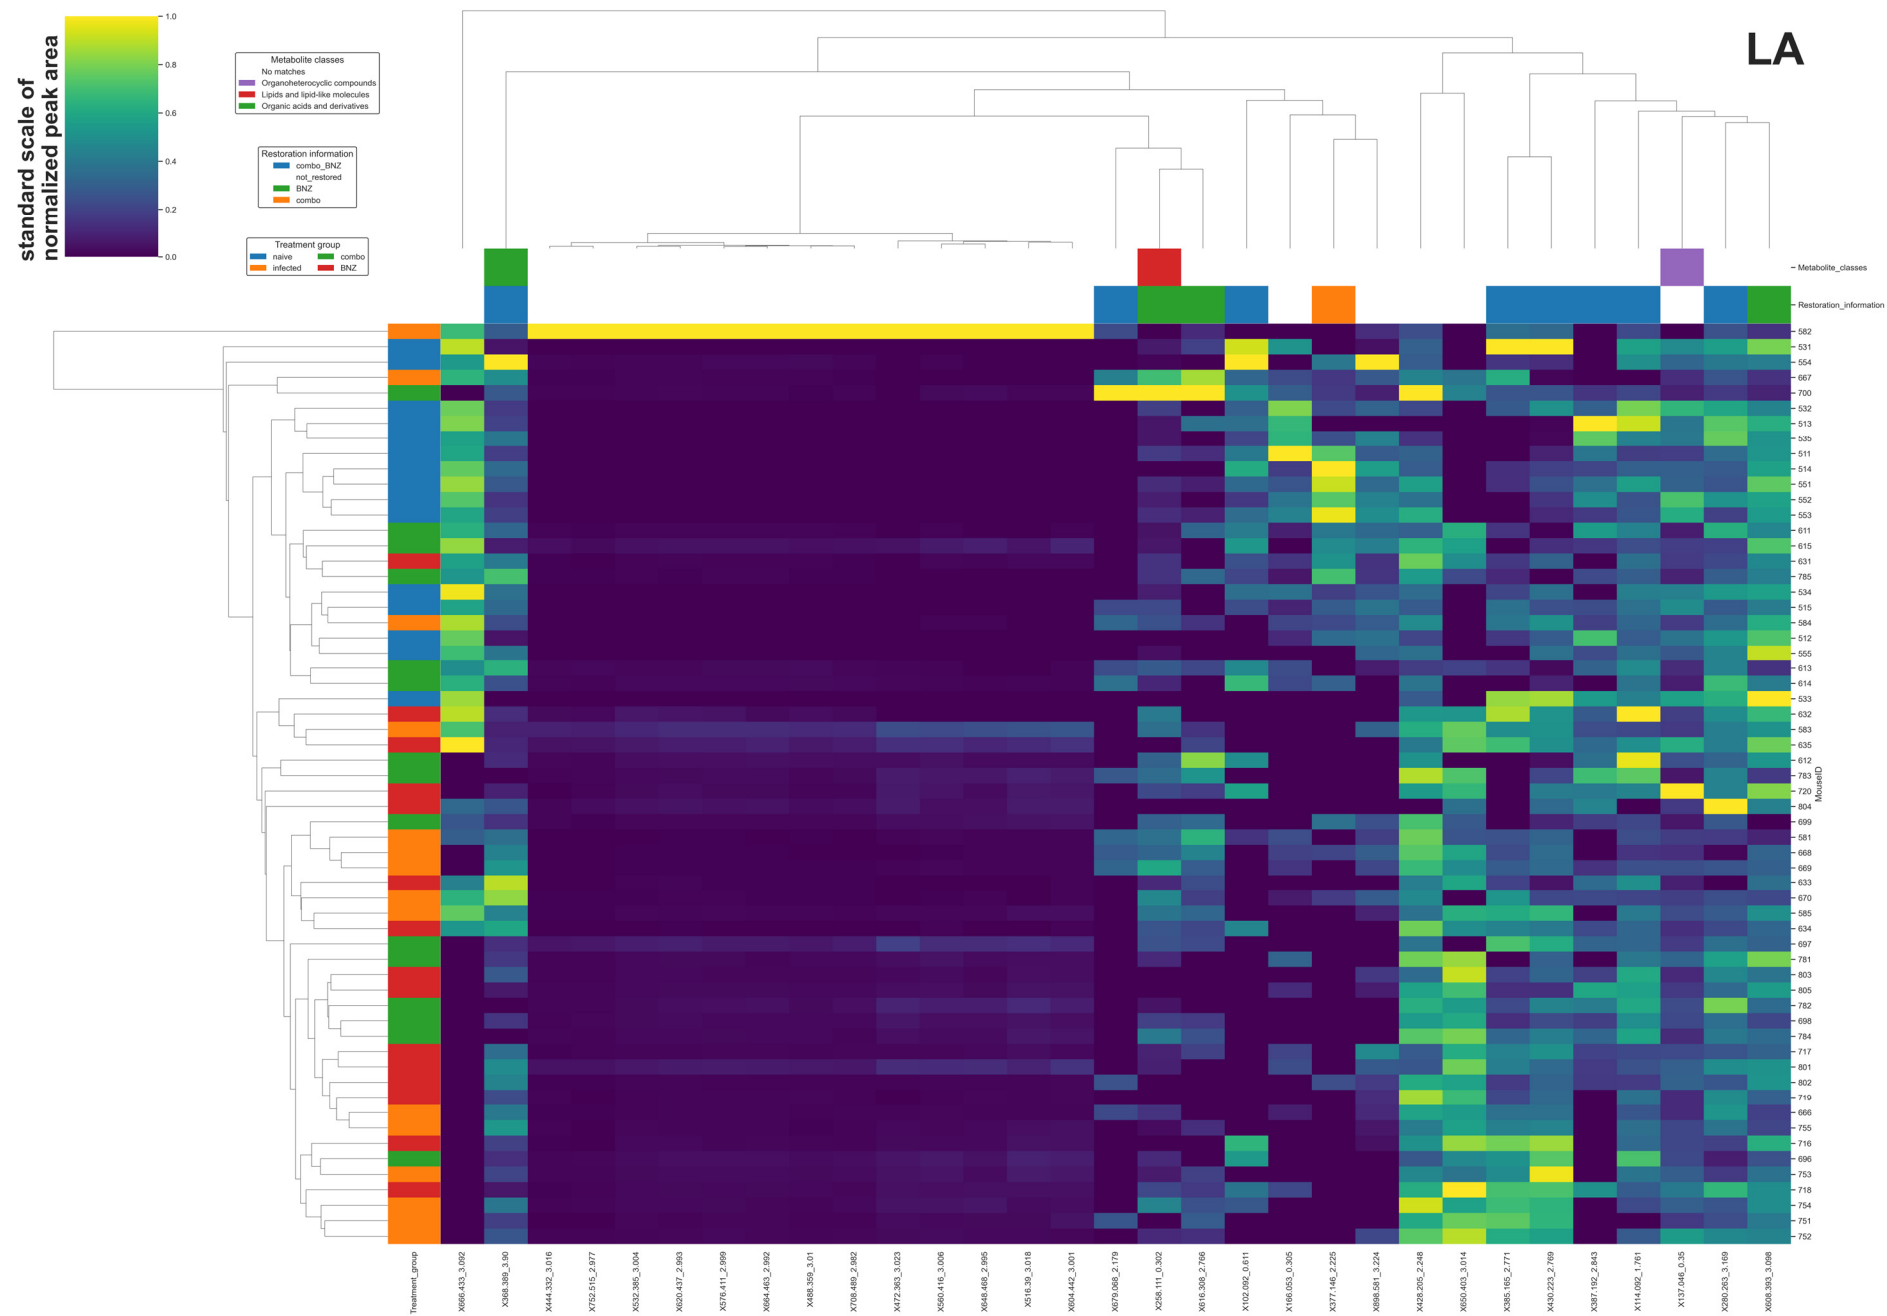

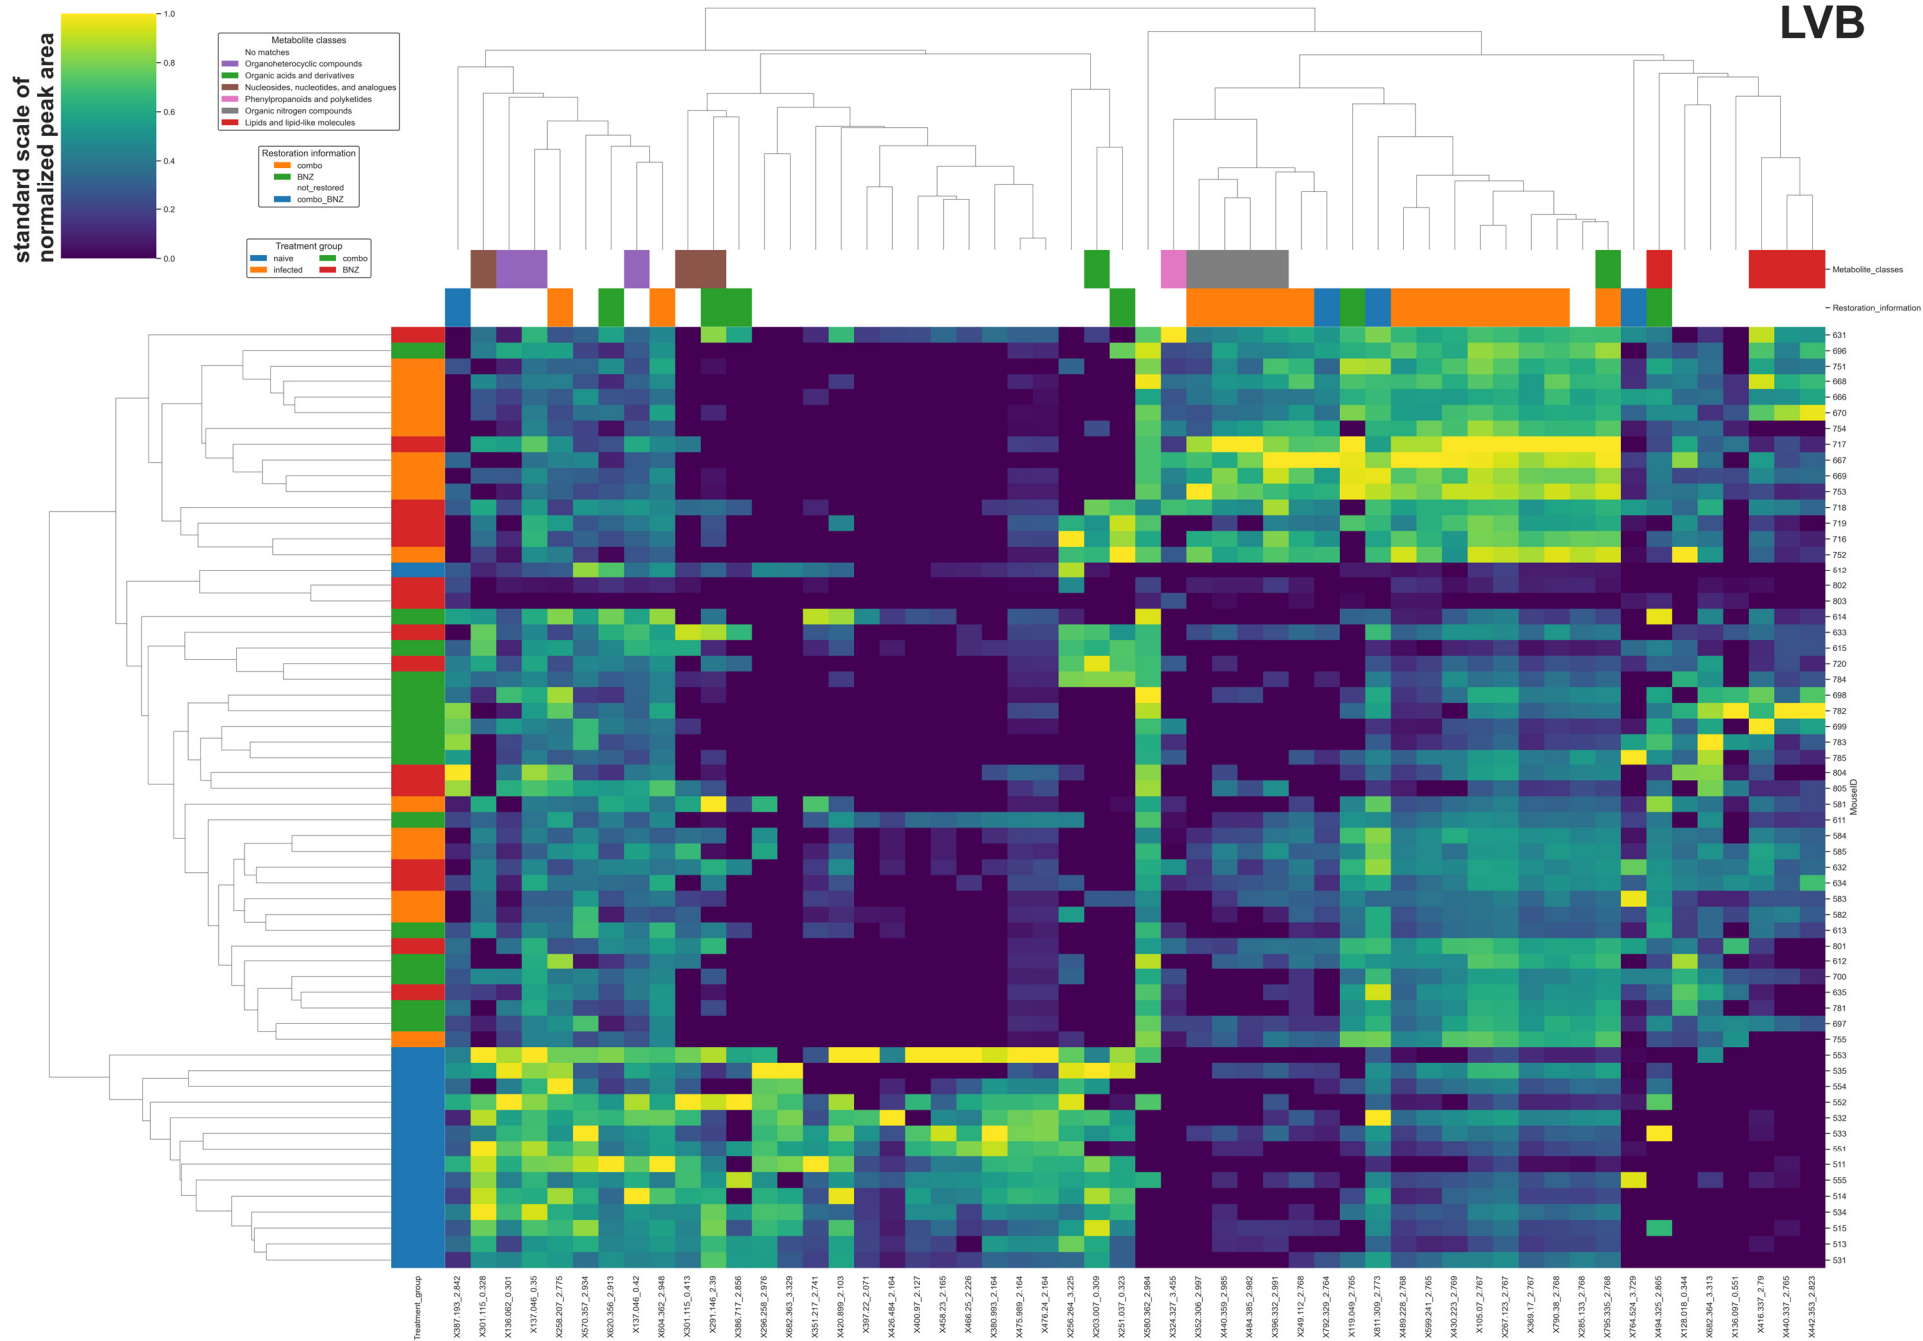

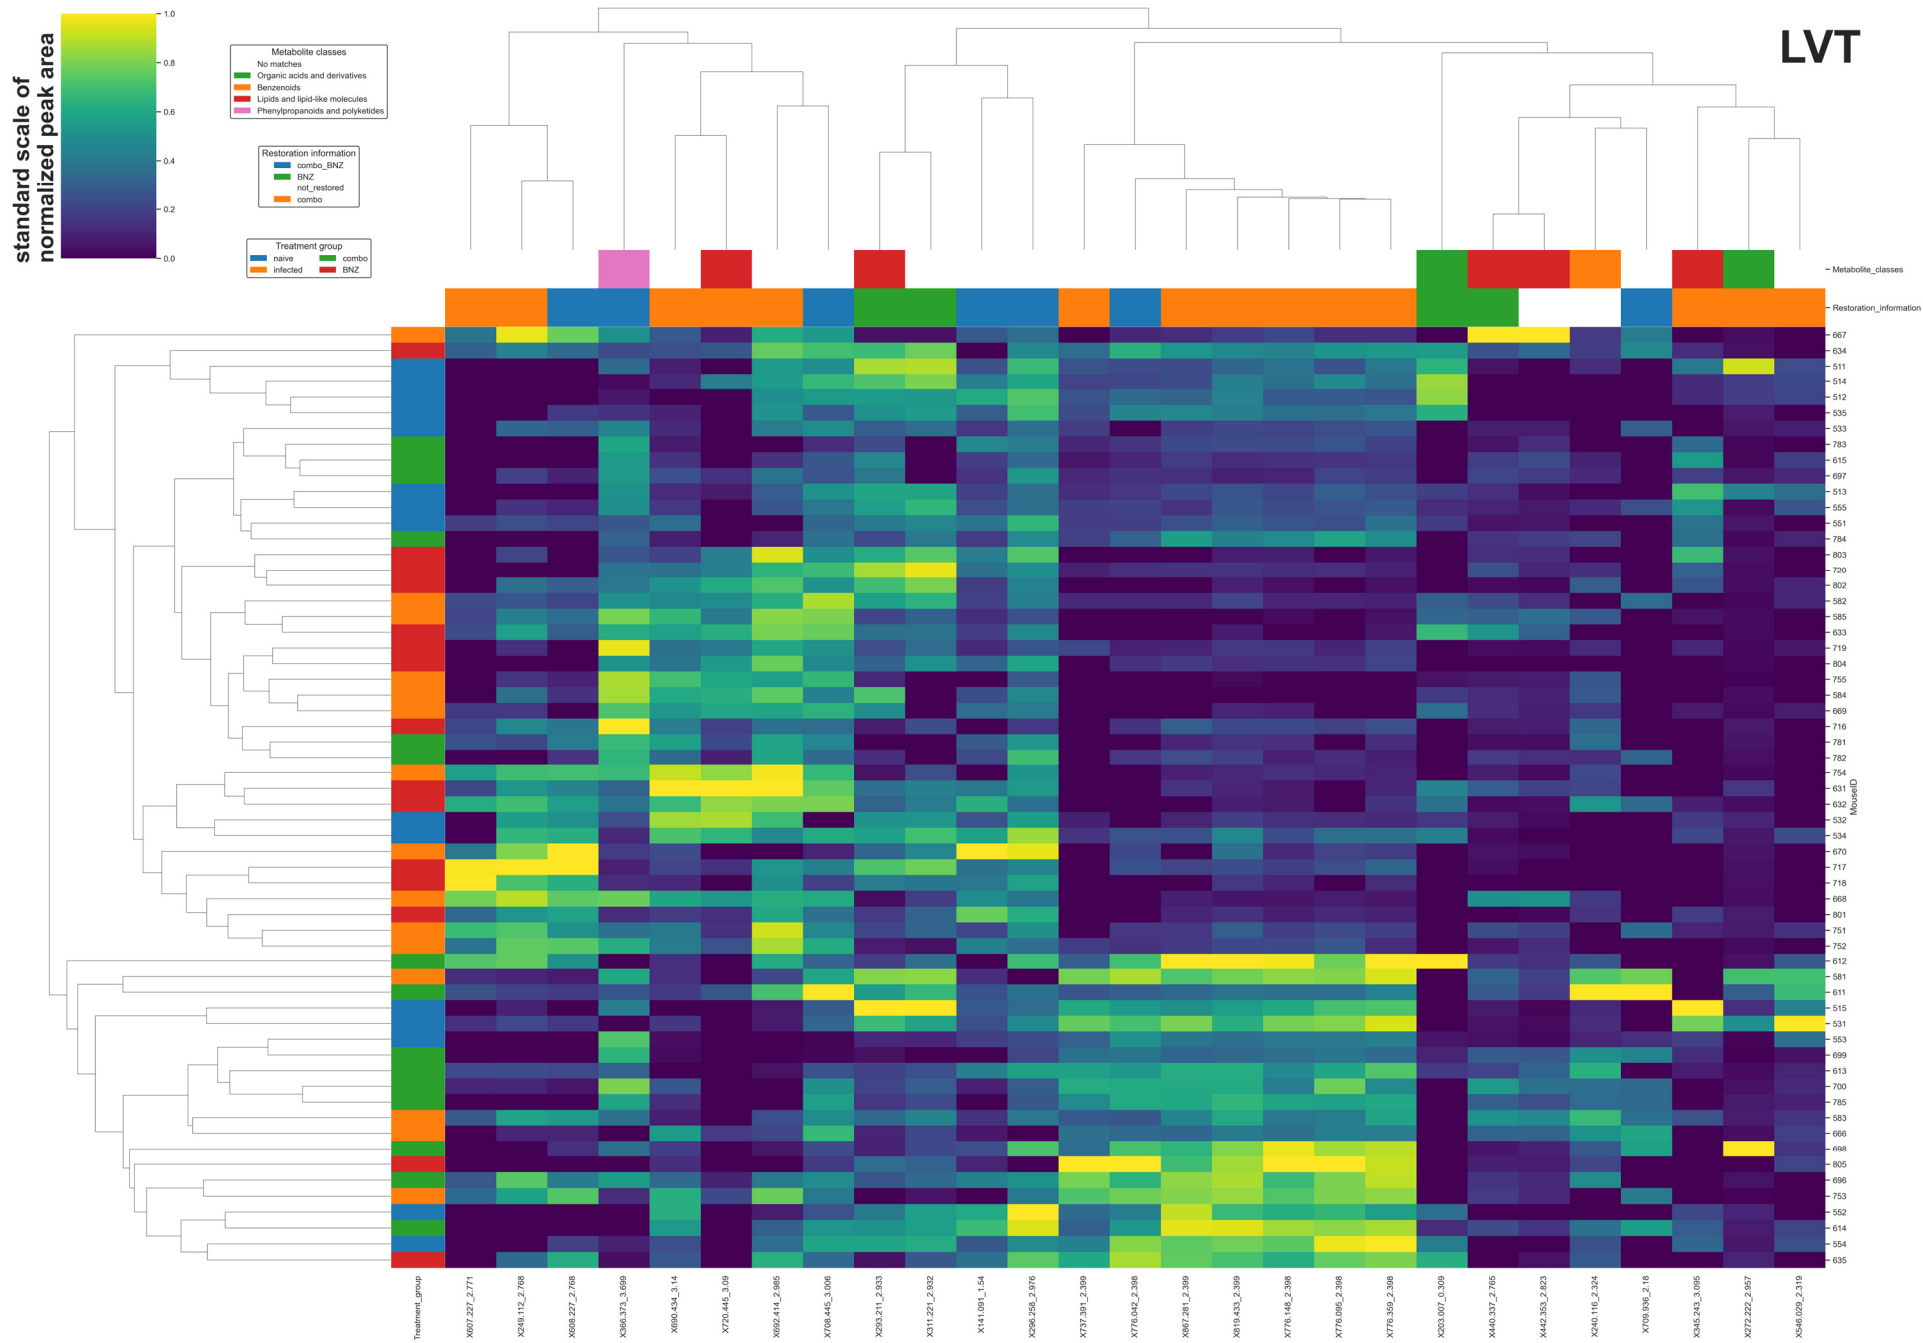

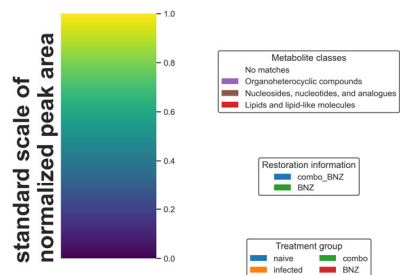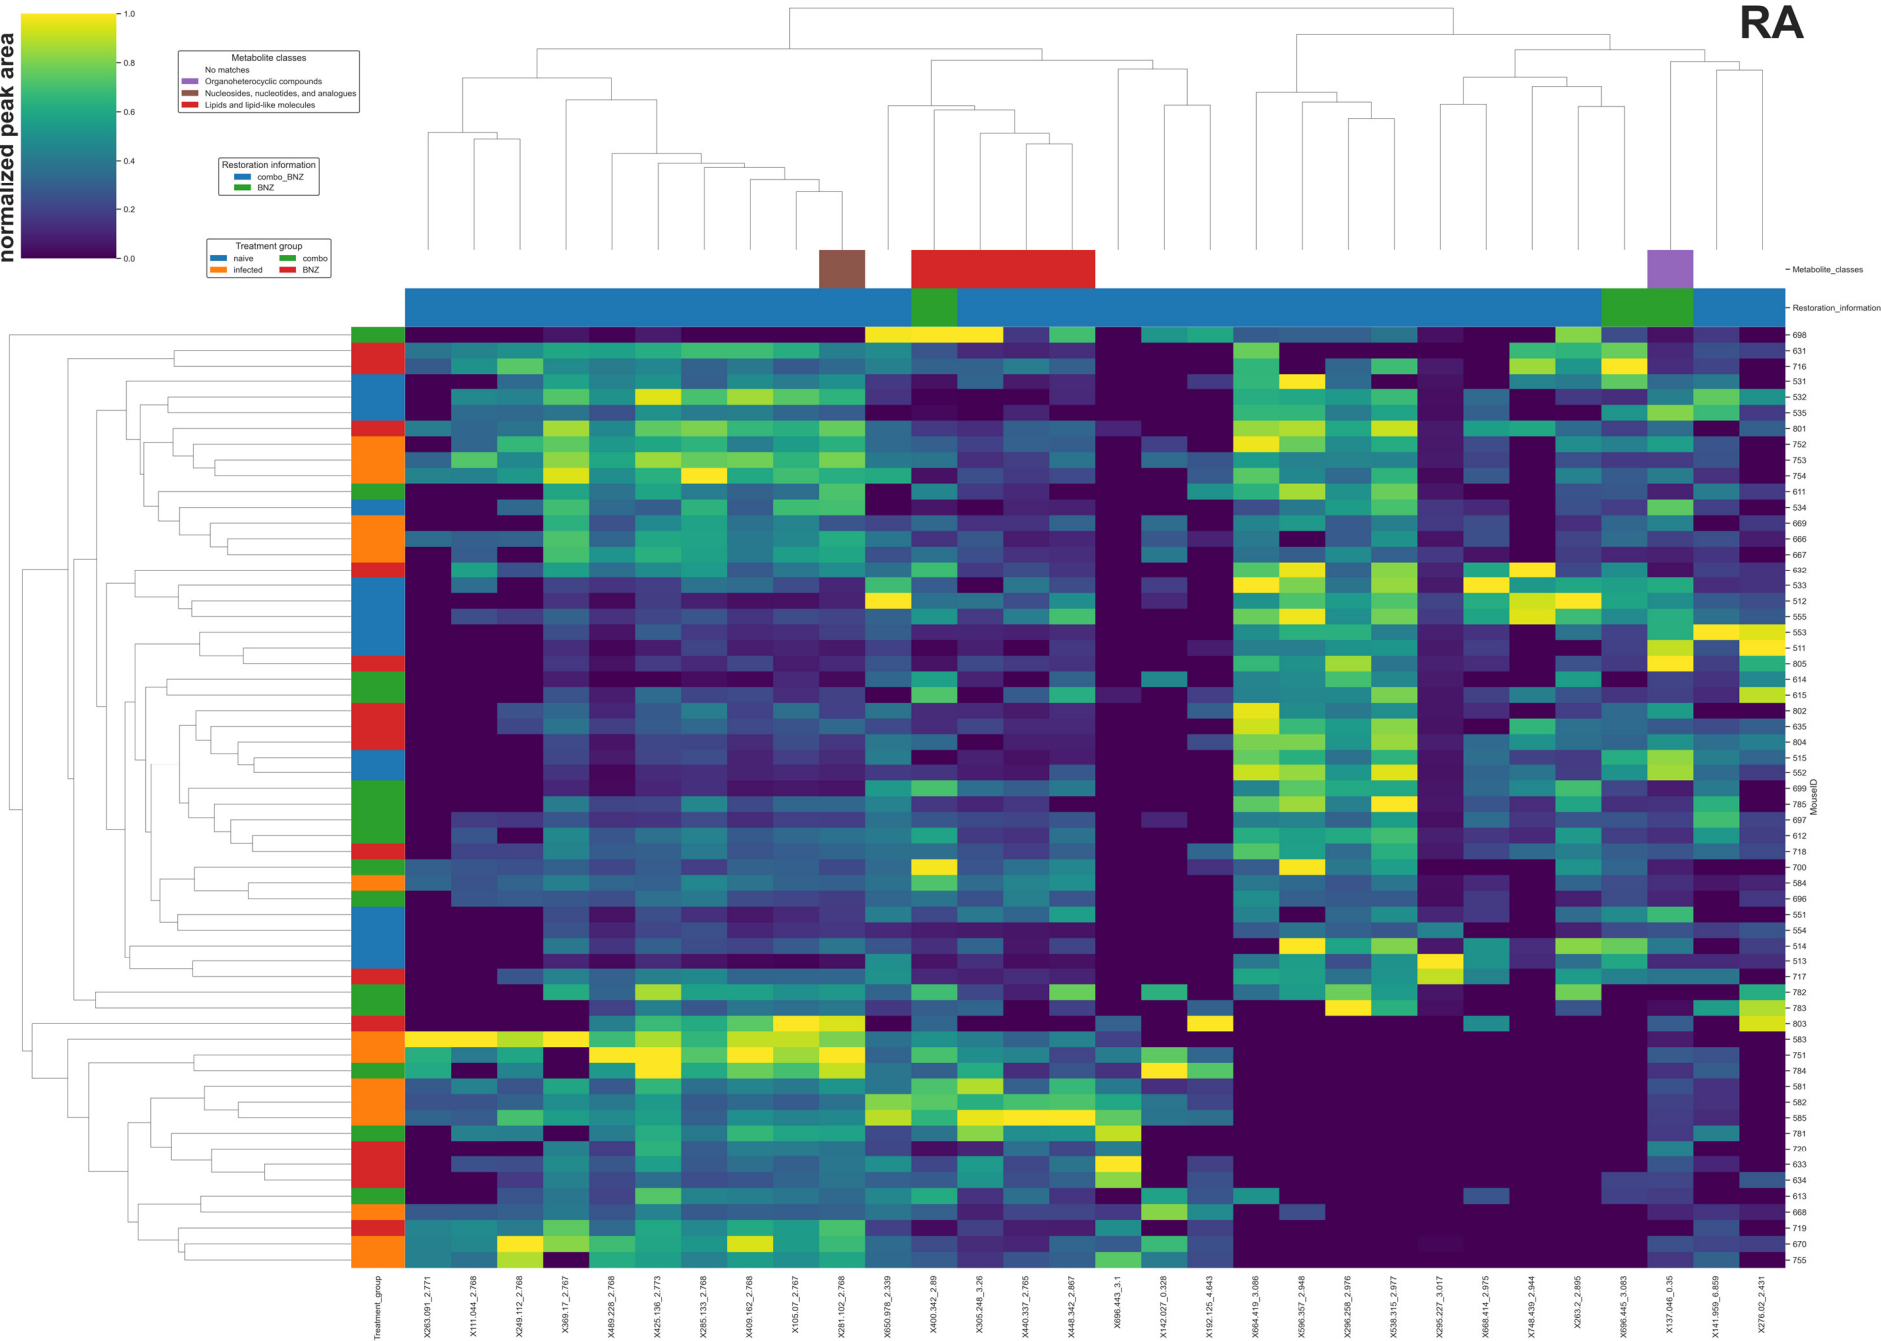

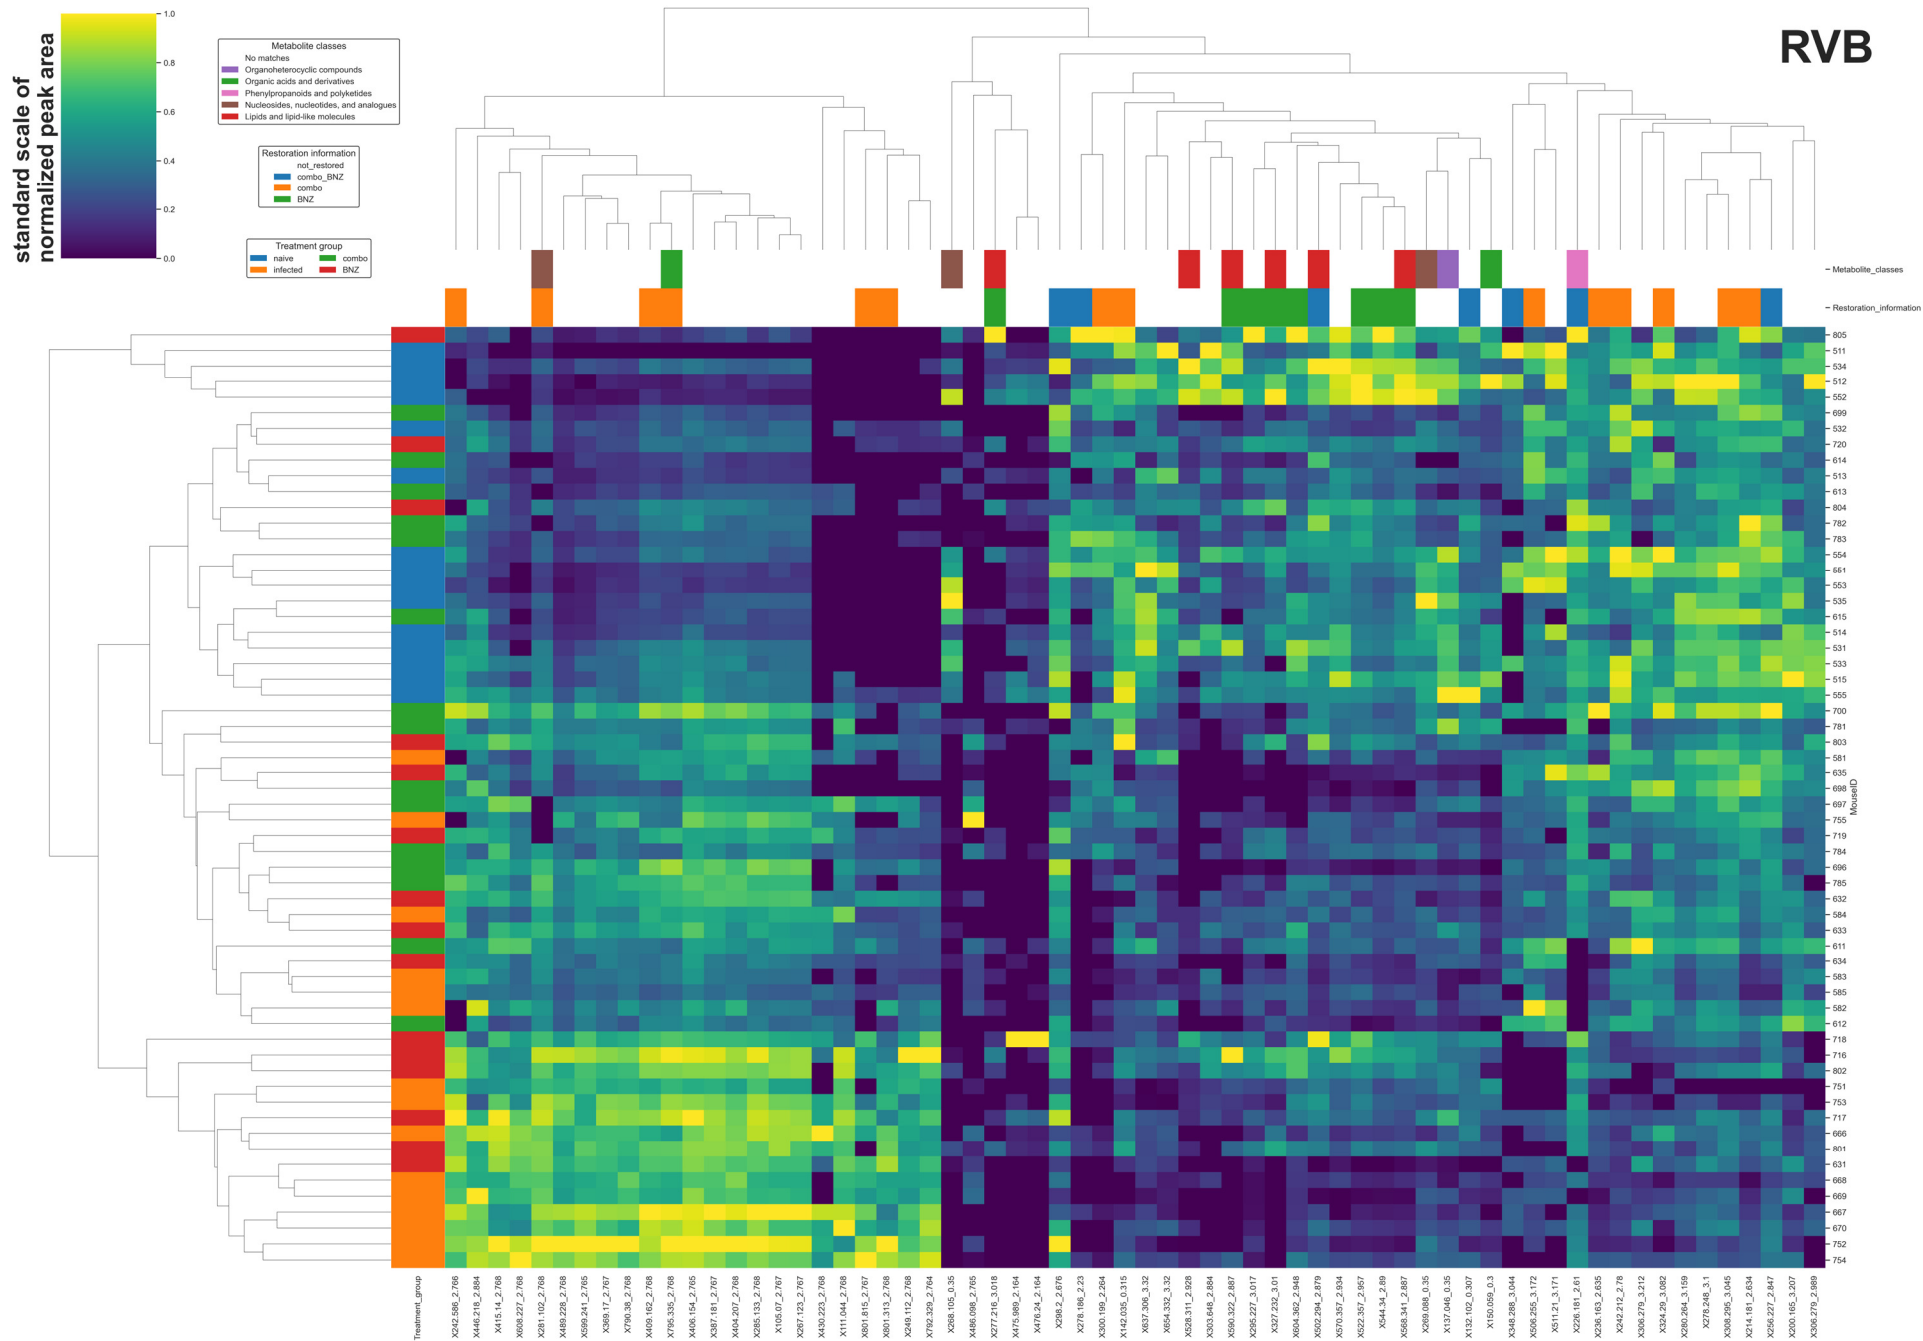

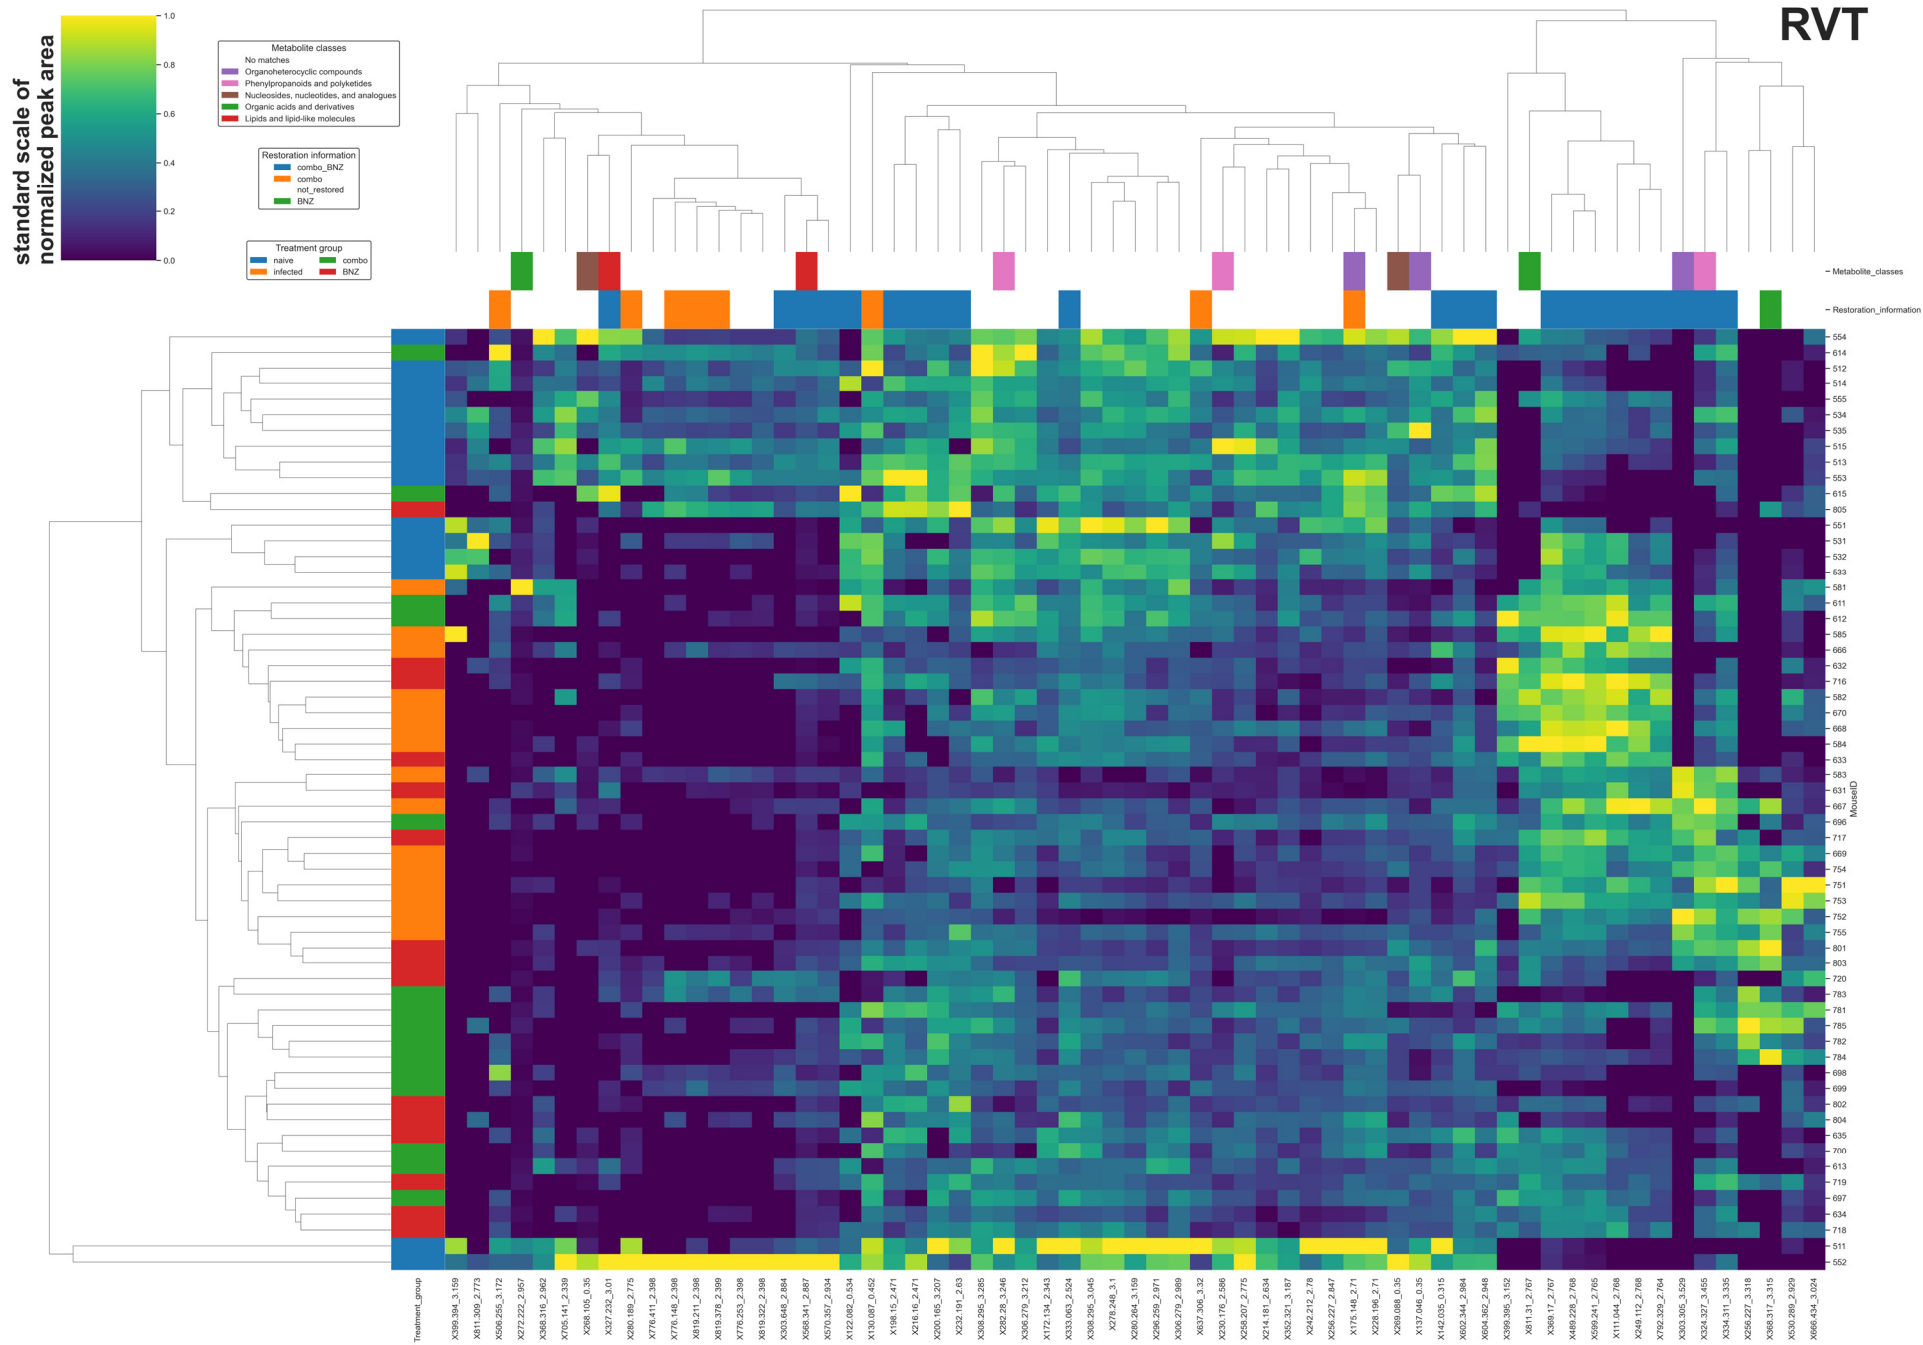

**Supplementary Table 13. Proportion of features in each outcome group and position that were correlated to metadata, at 142 DPI.** We sought to determine whether features restored by the different treatments at 142 days post-infection (DPI) or that failed to be restored presented differential association with the disease severity metadata. Specifically, we observed that a greater proportion of not-restored small molecule features were correlated with metadata at 142 DPI in the ventricles, compared to restored small molecule features. There was no clear differentiation between treatment groups. ("/" means that there were no small molecule features correlated with disease severity metadata in that section). N=15 mice per group and per position. Source data are provided as a Source Data file. LA, left atrium. RA, right atrium. LVT, left ventricle top. LVB, left ventricle bottom. RVT, right ventricle top. RVB, right ventricle bottom. BNZ, benznidazole.

| Section | Restored by any treatment | Restored by BNZ+Tc24 combination | Restored by BNZ-only treatment | Restored by both treatments | Not restored by any treatment |
|---------|---------------------------|----------------------------------|--------------------------------|-----------------------------|-------------------------------|
| LA      | 58%                       | 100%                             | 67%                            | 50%                         | 74%                           |
| RA      | 23%                       | /                                | 67%                            | 22%                         | /                             |
| LVT     | 16%                       | 7%                               | 75%                            | 29%                         | 100%                          |
| LVB     | 4%                        | 7%                               | 50%                            | 75%                         | 72%                           |
| RVT     | 35%                       | 25%                              | /                              | 50%                         | 63%                           |
| RVB     | 10%                       | 36%                              | /                              | /                           | 91%                           |

**Supplementary Table 14. Proportion of features in each outcome group and position that were correlated to metadata, at 75 DPI.** We then sought to determine whether these same features (restored or not by treatment at 142 DPI) had pre-existing correlations between their peak area at 75 DPI and the disease severity indicators at 75 DPI. Only a few of these restored or not-restored features were correlated with metadata at 75 DPI. Nevertheless, we observed that a greater proportion of not-restored small molecule features were correlated with metadata at 75 days post-infection in the left ventricle bottom, compared to restored small molecule features. The opposite pattern was observed in the right ventricle bottom. There was no clear differentiation between treatment groups. ("/" means that there is no small molecule correlated with disease severity metadata). N=15 mice per group and per position. Source data are provided as a Source Data file. LA, left atrium. RA, right atrium. LVT, left ventricle top. LVB, left ventricle bottom. RVT, right ventricle top. RVB, right ventricle bottom. BNZ, benznidazole.

| Section | Restored by any treatment | Restored by BNZ+Tc24 combination | Restored by BNZ-only treatment | Restored by both treatments | Not restored by any treatment |
|---------|---------------------------|----------------------------------|--------------------------------|-----------------------------|-------------------------------|
| LA      | /                         | /                                | /                              | /                           | /                             |
| RA      | /                         | /                                | /                              | /                           | /                             |
| LVT     | /                         | /                                | /                              | /                           | /                             |
| LVB     | 16%                       | 7%                               | 83%                            | /                           | 48%                           |
| RVT     | /                         | /                                | /                              | /                           | /                             |
| RVB     | 10%                       | /                                | 38%                            | 14%                         | 6%                            |

**Supplementary Table 15. Proportion of features in each outcome group and position that were correlated to multiple metadata parameters, at 142 DPI.** There was no clear association between treatments, restored or not-restored small molecule features, and being correlated with more than one disease severity metadata parameter. N=15 mice per group and per position. LA, left atrium. RA, right atrium. LVT, left ventricle top. LVB, left ventricle bottom. RVT, right ventricle top. RVB, right ventricle bottom. Source data are provided as a Source Data file.

| Sections | Restored by any treatment                              | Not restored                            | Fisher's exact test (two-tailed) |
|----------|--------------------------------------------------------|-----------------------------------------|----------------------------------|
| LA       | 43%                                                    | 36%                                     | p=1                              |
| RA       | No features correlated to multiple metadata parameters | All features were restored by treatment | Not applicable                   |
| LVT      | 25%                                                    | 50%                                     | p=1                              |
| LVB      | No features correlated to multiple metadata parameters | 38%                                     | p=1                              |
| RVT      | 55%                                                    | 10%                                     | p=0.012                          |
| RVB      | No features correlated to multiple metadata parameters | 28%                                     | p=0.553                          |

**Supplementary Table 16. Correlation between disease metadata and small molecule peak area at 75 DPI in LVB heart section.** N=15 mice per group and per position. Note that correlations are performed separately for each treatment effects, so the list of features that met our FDR-corrected p-value cutoff of <0.05 may not fully overlap between “Small molecules restored by any treatment” and small molecules restored by individual treatments. Source data are provided as a Source Data file. BNZ, benznidazole. FDR, false discovery rate. PC, glycerophosphocholine. LPC, lysoglycerophosphocholine.

| Effect of treatment                           | Disease severity metadata | Small molecules | Annotation                                     | Correlation | FDR_pval |
|-----------------------------------------------|---------------------------|-----------------|------------------------------------------------|-------------|----------|
| Small molecules restored by any treatment     | Liver_weight/Body_weight  | X291.146_2.39   | Didanosine_C10H12N4O3_(M+H+C4H6)               | -0.7461     | 0.000387 |
|                                               | Liver_weight/Body_weight  | X620.356_2.913  | No annotation                                  | -0.65606    | 0.003621 |
|                                               | Liver_weight/Body_weight  | X604.362_2.948  | PC 22:3;O_C30H54NO9P                           | -0.67297    | 0.003621 |
|                                               | Ejection_Fraction         | X291.146_2.39   | Didanosine_C10H12N4O3_(M+H+C4H6)               | -0.65835    | 0.003621 |
|                                               | Ejection_Fraction         | X494.325_2.865  | LPC 16:1_C24H48NO7P or LPC O-16:2;O_C24H48NO7P | 0.568551    | 0.036584 |
| Restored only by BNZ + Tc24 vaccine treatment | Liver_weight/Body_weight  | X604.362_2.948  | PC 22:3;O_C30H54NO9P                           | -0.67297    | 0.004838 |
| Restored only by BNZ treatment                | Liver_weight/Body_weight  | X291.146_2.39   | Didanosine_C10H12N4O3_(M+H+C4H6)               | -0.7461     | 9.29E-05 |
|                                               | Liver_weight/Body_weight  | X620.356_2.913  | No annotation                                  | -0.65606    | 0.001159 |
|                                               | Ejection_Fraction         | X291.146_2.39   | Didanosine_C10H12N4O3_(M+H+C4H6)               | -0.65835    | 0.001159 |
|                                               | Ejection_Fraction         | X494.325_2.865  | LPC 16:1_C24H48NO7P or LPC O-16:2;O_C24H48NO7P | 0.568551    | 0.010975 |
|                                               | Ejection_Fraction         | X386.717_2.856  | No annotation                                  | -0.52709    | 0.023222 |
|                                               | Liver_weight/Body_weight  | X386.717_2.856  | No annotation                                  | -0.51117    | 0.023347 |
|                                               | P Amplitude (V)           | X251.037_0.323  | No annotation                                  | 0.515071    | 0.023347 |
|                                               | Liver_weight/Body_weight  | X494.325_2.865  | LPC 16:1_C24H48NO7P or LPC O-16:2;O_C24H48NO7P | 0.488085    | 0.032622 |
| Not restored by any treatments                | Liver_weight/Body_weight  | X136.062_0.301  | No annotation                                  | -0.72444    | 0.000609 |
|                                               | Ejection_Fraction         | X682.363_3.329  | No annotation                                  | -0.73773    | 0.000609 |
|                                               | Liver_weight/Body_weight  | X301.115_0.413  | No annotation                                  | -0.70525    | 0.000913 |
|                                               | Liver_weight/Body_weight  | X476.24_2.164   | No annotation                                  | -0.69392    | 0.001072 |
|                                               | Ejection_Fraction         | X137.046_0.35   | Hypoxanthine_C5H4N4O                           | -0.68276    | 0.00131  |
|                                               | Liver_weight/Body_weight  | X682.364_3.313  | No annotation                                  | 0.670758    | 0.001687 |
|                                               | Liver_weight/Body_weight  | X475.989_2.164  | No annotation                                  | -0.65863    | 0.001926 |
|                                               | Ejection_Fraction         | X682.364_3.313  | No annotation                                  | 0.658869    | 0.001926 |
|                                               | Liver_weight/Body_weight  | X682.363_3.329  | No annotation                                  | -0.65201    | 0.002137 |
|                                               | Liver_weight/Body_weight  | X301.115_0.328  | No annotation                                  | -0.63974    | 0.002861 |

|                          |                |                      |          |          |
|--------------------------|----------------|----------------------|----------|----------|
| Liver_weight/Body_weight | X137.046_0.42  | No annotation        | -0.63026 | 0.003495 |
| Ejection_Fraction        | X580.362_2.984 | PC 20:1;O_C28H54NO9P | 0.621978 | 0.004114 |
| Liver_weight/Body_weight | X380.993_2.164 | No annotation        | -0.59561 | 0.007476 |
| Ejection_Fraction        | X203.007_0.309 | No annotation        | -0.59756 | 0.007476 |
| Ejection_Fraction        | X137.046_0.42  | No annotation        | -0.58932 | 0.007753 |
| P Amplitude (V)          | X301.115_0.413 | No annotation        | 0.590605 | 0.007753 |
| P Amplitude (V)          | X136.062_0.301 | No annotation        | 0.583222 | 0.008557 |
| Ejection_Fraction        | X301.115_0.328 | No annotation        | -0.58111 | 0.008557 |
| Liver_weight/Body_weight | X136.097_0.551 | No annotation        | 0.56922  | 0.010012 |
| Liver_weight/Body_weight | X203.007_0.309 | No annotation        | -0.57157 | 0.010012 |
| Ejection_Fraction        | X136.062_0.301 | No annotation        | -0.56892 | 0.010012 |
| Ejection_Fraction        | X301.115_0.413 | No annotation        | -0.56515 | 0.010496 |
| Ejection_Fraction        | X475.989_2.164 | No annotation        | -0.55009 | 0.014019 |
| P Amplitude (V)          | X137.046_0.35  | Hypoxanthine_C5H4N4O | 0.549561 | 0.014019 |
| P Amplitude (V)          | X203.007_0.309 | No annotation        | 0.543322 | 0.015567 |
| Liver_weight/Body_weight | X324.327_3.455 | Erucylamide          | 0.53661  | 0.017452 |
| Ejection_Fraction        | X476.24_2.164  | No annotation        | -0.53401 | 0.017822 |
| Liver_weight/Body_weight | X137.046_0.35  | Hypoxanthine_C5H4N4O | -0.52436 | 0.021277 |
| P Amplitude (V)          | X137.046_0.42  | No annotation        | 0.488597 | 0.043062 |

---

**Supplementary Table 17. Correlation between disease metadata and small molecule peak area at 75 DPI in RVB heart section.** N=15 mice per group and per position. Note that correlations are performed separately for each treatment effects, so the list of features that met our FDR-corrected p-value cutoff of <0.05 may not fully overlap between “Small molecules restored by any treatment” and small molecules restored by individual treatments. Source data are provided as a Source Data file. BNZ, benznidazole. FDR, false discovery rate. PC, glycerophosphocholine. LPC, lysoglycerophosphocholine.

| Effect of treatment                       | Disease severity metadata | Small molecules | Annotation                                    | Correlation | FDR_pval |
|-------------------------------------------|---------------------------|-----------------|-----------------------------------------------|-------------|----------|
| Small molecules restored by any treatment | Liver_weight/Body_weight  | X568.341_2.887  | LPC 22:6_C30H50NO7P or PC O-22:6_C30H50NO7P   | 0.599555    | 0.034157 |
|                                           | Liver_weight/Body_weight  | X590.322_2.887  | No annotation                                 | 0.593764    | 0.034157 |
|                                           | Liver_weight/Body_weight  | X132.102_0.307  | No annotation                                 | 0.615128    | 0.034157 |
|                                           | P Amplitude (V)           | X568.341_2.887  | LPC 22:6_C30H50NO7P or PC O-22:6_C30H50NO7P   | -0.57604    | 0.040867 |
| Restored only by BNZ treatment            | Liver_weight/Body_weight  | X568.341_2.887  | LPC 22:6_C30H50NO7P or PC O-22:6_C30H50NO7P   | 0.599555    | 0.015181 |
|                                           | Liver_weight/Body_weight  | X590.322_2.887  | No annotation                                 | 0.593764    | 0.015181 |
|                                           | P Amplitude (V)           | X568.341_2.887  | LPC 22:6_C30H50NO7P or PC O-22:6_C30H50NO7P   | -0.57604    | 0.016145 |
|                                           | P Amplitude (V)           | X522.357_2.957  | LPC 18:1_C26H52NO7P or PC O-18:2;O_C26H52NO7P | -0.52909    | 0.037031 |
| Restored by both treatment                | Liver_weight/Body_weight  | X132.102_0.307  | No annotation                                 | 0.615128    | 0.012496 |
| Not restored by any treatments            | Liver_weight/Body_weight  | X150.059_0.3    | Methionine_C5H11NO2S                          | 0.650568    | 0.024341 |
|                                           | Liver_weight/Body_weight  | X303.648_2.884  | No annotation                                 | 0.628398    | 0.024553 |

**Supplementary Table 18. Correlation between disease metadata and small molecule peak area at 142 DPI in LA heart section.** N=15 mice per group and per position. Note that correlations are performed separately for each treatment effects, so the list of features that met our FDR-corrected p-value cutoff of <0.05 may not fully overlap between “Small molecules restored by any treatment” and small molecules restored by individual treatments. Source data are provided as a Source Data file. BNZ, benznidazole. FDR, false discovery rate. PC, glycerophosphocholine. LPC, lysoglycerophosphocholine.

| Effect of treatment                           | Disease severity metadata | Small molecules | Annotation                   | Correlation | FDR_pval |
|-----------------------------------------------|---------------------------|-----------------|------------------------------|-------------|----------|
| Small molecules restored by any treatment     | QTc (s)                   | X679.068_2.179  | No annotation                | 0.622574    | 0.020068 |
|                                               | Liver_weight/Body_weight  | X385.165_2.771  | No annotation                | 0.598082    | 0.020239 |
|                                               | Liver_weight/Body_weight  | X679.068_2.179  | No annotation                | 0.57173     | 0.020615 |
|                                               | PR Interval (s)           | X679.068_2.179  | No annotation                | 0.571054    | 0.020615 |
|                                               | Liver_weight/Body_weight  | X387.192_2.843  | No annotation                | -0.54941    | 0.027941 |
|                                               | Liver_weight/Body_weight  | X616.308_2.766  | No annotation                | 0.539232    | 0.028487 |
|                                               | CD3.CD8.IFN $\gamma$ .    | X114.092_1.761  | 3-Aminocaproic acid_C6H13NO2 | 0.533942    | 0.028487 |
|                                               | PR Interval (s)           | X114.092_1.761  | 3-Aminocaproic acid_C6H13NO2 | -0.5247     | 0.030588 |
|                                               | CD3.CD8.IFN $\gamma$ .    | X608.393_3.098  | PC 22:1;O_C30H58NO9P         | 0.516079    | 0.032743 |
|                                               | Liver_weight/Body_weight  | X377.146_2.225  | Riboflavin_C17H20N4O6        | -0.49759    | 0.043217 |
|                                               | Liver_weight/Body_weight  | X608.393_3.098  | PC 22:1;O_C30H58NO9P         | -0.48604    | 0.049388 |
| Restored only by BNZ + Tc24 vaccine treatment | Liver_weight/Body_weight  | X377.146_2.225  | Riboflavin_C17H20N4O6        | -0.49759    | 0.036014 |
| Restored only by BNZ treatment                | Liver_weight/Body_weight  | X616.308_2.766  | No annotation                | 0.539232    | 0.036836 |
|                                               | CD3.CD8.IFN $\gamma$ .    | X608.393_3.098  | PC 22:1;O_C30H58NO9P         | 0.516079    | 0.036836 |
|                                               | Liver_weight/Body_weight  | X608.393_3.098  | PC 22:1;O_C30H58NO9P         | -0.48604    | 0.045273 |
| Restored by both treatments                   | QTc (s)                   | X679.068_2.179  | No annotation                | 0.622574    | 0.013379 |
|                                               | Liver_weight/Body_weight  | X385.165_2.771  | No annotation                | 0.598082    | 0.013493 |
|                                               | Liver_weight/Body_weight  | X679.068_2.179  | No annotation                | 0.57173     | 0.013743 |
|                                               | PR Interval (s)           | X679.068_2.179  | No annotation                | 0.571054    | 0.013743 |
|                                               | Liver_weight/Body_weight  | X387.192_2.843  | No annotation                | -0.54941    | 0.018628 |
|                                               | CD3.CD8.IFN $\gamma$ .    | X114.092_1.761  | 3-Aminocaproic acid_C6H13NO2 | 0.533942    | 0.022157 |
|                                               | PR Interval (s)           | X114.092_1.761  | 3-Aminocaproic acid_C6H13NO2 | -0.5247     | 0.023305 |

|                               |                          |                |                        |          |          |
|-------------------------------|--------------------------|----------------|------------------------|----------|----------|
| Not restored by any treatment | Liver_weight/Body_weight | X137.046_0.35  | Hypoxanthine_C5H4N4O   | -0.6022  | 0.021252 |
|                               | Liver_weight/Body_weight | X648.468_2.995 | No annotation          | 0.606568 | 0.021252 |
|                               | PR Interval (s)          | X137.046_0.35  | Hypoxanthine_C5H4N4O   | -0.58783 | 0.021252 |
|                               | P Amplitude (V)          | X532.385_3.004 | No annotation          | -0.58763 | 0.021252 |
|                               | Liver_weight/Body_weight | X650.403_3.014 | PC 24:2;O2_C32H60NO10P | 0.571511 | 0.025812 |
|                               | Liver_weight/Body_weight | X532.385_3.004 | No annotation          | 0.563337 | 0.026369 |
|                               | Liver_weight/Body_weight | X516.39_3.018  | No annotation          | 0.543746 | 0.029755 |
|                               | Liver_weight/Body_weight | X604.442_3.001 | No annotation          | 0.550523 | 0.029755 |
|                               | P Amplitude (V)          | X620.437_2.993 | No annotation          | -0.54119 | 0.029755 |
|                               | Liver_weight/Body_weight | X560.416_3.006 | No annotation          | 0.521915 | 0.031665 |
|                               | Liver_weight/Body_weight | X620.437_2.993 | No annotation          | 0.52907  | 0.031665 |
|                               | P Amplitude (V)          | X444.332_3.016 | No annotation          | -0.52447 | 0.031665 |
|                               | P Amplitude (V)          | X664.463_2.992 | No annotation          | -0.5233  | 0.031665 |
|                               | Liver_weight/Body_weight | X576.411_2.999 | No annotation          | 0.514435 | 0.033494 |
|                               | Liver_weight/Body_weight | X664.463_2.992 | No annotation          | 0.509506 | 0.033494 |
|                               | P Amplitude (V)          | X576.411_2.999 | No annotation          | -0.5111  | 0.033494 |
|                               | QTc (s)                  | X137.046_0.35  | Hypoxanthine_C5H4N4O   | -0.50211 | 0.036721 |
|                               | Liver_weight/Body_weight | X472.363_3.023 | No annotation          | 0.496124 | 0.037089 |
|                               | P Amplitude (V)          | X708.489_2.982 | No annotation          | -0.49861 | 0.037089 |
|                               | P Amplitude (V)          | X666.433_3.092 | PC 25:1;O2_C33H64NO10P | 0.481719 | 0.046755 |

**Supplementary Table 19. Correlation between disease metadata and small molecule peak area at 142 DPI in RA heart section.** N=15 mice per group and per position. Note that correlations are performed separately for each treatment effects, so the list of features that met our FDR-corrected p-value cutoff of <0.05 may not fully overlap between “Small molecules restored by any treatment” and small molecules restored by individual treatments. Source data are provided as a Source Data file. BNZ, benznidazole. FDR, false discovery rate.

| Effect of treatment                       | Disease severity metadata | Small molecules | Annotation                                   | Correlation | FDR_pval |
|-------------------------------------------|---------------------------|-----------------|----------------------------------------------|-------------|----------|
| Small molecules restored by any treatment | Liver_weight/Body_weight  | X263.091_2.771  | No annotation                                | 0.635334    | 0.016996 |
|                                           | Liver_weight/Body_weight  | X296.258_2.976  | No annotation                                | -0.647      | 0.016996 |
|                                           | Liver_weight/Body_weight  | X295.227_3.017  | No annotation                                | -0.60308    | 0.022098 |
|                                           | Liver_weight/Body_weight  | X538.315_2.977  | No annotation                                | -0.60296    | 0.022098 |
|                                           | Liver_weight/Body_weight  | X137.046_0.35   | Hypoxanthine_C5H4N4O                         | -0.56771    | 0.037362 |
|                                           | Liver_weight/Body_weight  | X696.443_3.1    | No annotation                                | 0.573466    | 0.037362 |
|                                           | Liver_weight/Body_weight  | X305.248_3.26   | cis-5,8,11,14-Eicosatetraenoic acid_C20H32O2 | 0.554974    | 0.04372  |
| Restored only by BNZ treatment            | Liver_weight/Body_weight  | X137.046_0.35   | Hypoxanthine_C5H4N4O                         | -0.56771    | 0.022417 |
|                                           | Ejection_Fraction         | X137.046_0.35   | Hypoxanthine_C5H4N4O                         | -0.51591    | 0.024648 |
|                                           | P Amplitude (V)           | X696.445_3.083  | No annotation                                | 0.520571    | 0.024648 |
| Restored by both treatments               | Liver_weight/Body_weight  | X263.091_2.771  | No annotation                                | 0.635334    | 0.015296 |
|                                           | Liver_weight/Body_weight  | X296.258_2.976  | No annotation                                | -0.647      | 0.015296 |
|                                           | Liver_weight/Body_weight  | X295.227_3.017  | No annotation                                | -0.60308    | 0.019888 |
|                                           | Liver_weight/Body_weight  | X538.315_2.977  | No annotation                                | -0.60296    | 0.019888 |
|                                           | Liver_weight/Body_weight  | X696.443_3.1    | No annotation                                | 0.573466    | 0.034909 |
|                                           | Liver_weight/Body_weight  | X305.248_3.26   | cis-5,8,11,14-Eicosatetraenoic acid_C20H32O2 | 0.554974    | 0.045906 |

**Supplementary Table 20. Correlation between disease metadata and small molecule peak area at 142 DPI in LVT heart section.** N=15 mice per group and per position. Note that correlations are performed separately for each treatment effects, so the list of features that met our FDR-corrected p-value cutoff of <0.05 may not fully overlap between “Small molecules restored by any treatment” and small molecules restored by individual treatments. Source data are provided as a Source Data file. BNZ, benznidazole. FDR, false discovery rate. CAR, acylcarnitine.

| Effect of treatment                           | Disease severity metadata | Small molecules | Annotation                    | Correlation | FDR_pval |
|-----------------------------------------------|---------------------------|-----------------|-------------------------------|-------------|----------|
| Small molecules restored by any treatment     | Ejection_Fraction         | X440.337_2.765  | CAR 18:2;O_C25H45NO5          | 0.672242    | 0.004138 |
|                                               | P Amplitude (V)           | X272.222_2.957  | N-Lauroylsarcosine_C15H29NO3  | 0.679644    | 0.004138 |
|                                               | Liver_weight/Body_weight  | X440.337_2.765  | CAR 18:2;O_C25H45NO5          | 0.64704     | 0.006504 |
|                                               | Liver_weight/Body_weight  | X366.373_3.699  | Oleamide_C18H35NO_(M+H+C6H12) | 0.572637    | 0.041262 |
|                                               | Liver_weight/Body_weight  | X296.258_2.976  | No annotation                 | -0.55854    | 0.046812 |
| Restored only by BNZ + Tc24 vaccine treatment | P Amplitude (V)           | X272.222_2.957  | N-Lauroylsarcosine_C15H29NO3  | 0.679644    | 0.003546 |
| Restored only by BNZ treatment                | Ejection_Fraction         | X440.337_2.765  | CAR 18:2;O_C25H45NO5          | 0.672242    | 0.001324 |
|                                               | Liver_weight/Body_weight  | X440.337_2.765  | CAR 18:2;O_C25H45NO5          | 0.64704     | 0.001561 |
|                                               | Liver_weight/Body_weight  | X203.007_0.309  | No annotation                 | -0.52487    | 0.027088 |
|                                               | P Amplitude (V)           | X293.211_2.933  | trans-EKODE-(E)-Ib_C18H30O4   | 0.485651    | 0.045613 |
| Restored by both treatments                   | Liver_weight/Body_weight  | X296.258_2.976  | No annotation                 | -0.55854    | 0.032768 |
|                                               | Liver_weight/Body_weight  | X366.373_3.699  | Oleamide_C18H35NO_(M+H+C6H12) | 0.572637    | 0.032768 |
| Not restored by any treatment                 | Liver_weight/Body_weight  | X442.353_2.823  | CAR 18:1;O_C25H47NO5          | 0.672949    | 0.000646 |
|                                               | Ejection_Fraction         | X442.353_2.823  | CAR 18:1;O_C25H47NO5          | 0.588102    | 0.004419 |
|                                               | Liver_weight/Body_weight  | X240.116_2.324  | No annotation                 | 0.562088    | 0.005724 |

**Supplementary Table 21. Correlation between disease metadata and small molecule peak area at 142 DPI in LVB heart section.** N=15 mice per group and per position. Note that correlations are performed separately for each treatment effects, so the list of features that met our FDR-corrected p-value cutoff of <0.05 may not fully overlap between “Small molecules restored by any treatment” and small molecules restored by individual treatments. Source data are provided as a Source Data file. BNZ, benznidazole. FDR, false discovery rate. PC, glycerophosphocholine. LPC, lysoglycerophosphocholine. CAR, acylcarnitine.

| Effect of treatment                           | Disease severity metadata | Small molecules | Annotation                                     | Correlation | FDR_pval |
|-----------------------------------------------|---------------------------|-----------------|------------------------------------------------|-------------|----------|
| Small molecules restored by any treatment     | Liver_weight/Body_weight  | X249.112_2.768  | No annotation                                  | 0.625096    | 0.038764 |
| Restored only by BNZ + Tc24 vaccine treatment | Liver_weight/Body_weight  | X249.112_2.768  | No annotation                                  | 0.625096    | 0.023259 |
| Restored only by BNZ treatment                | P Amplitude (V)           | X291.146_2.39   | Didanosine_C10H12N4O3_(M+H+C4H6)               | 0.574694    | 0.037595 |
|                                               | Liver_weight/Body_weight  | X119.049_2.765  | No annotation                                  | 0.523439    | 0.041921 |
|                                               | Liver_weight/Body_weight  | X494.325_2.865  | LPC 16:1_C24H48NO7P or LPC O-16:2;O_C24H48NO7P | 0.527634    | 0.041921 |
| Restored by both treatments                   | Liver_weight/Body_weight  | X792.329_2.764  | No annotation                                  | 0.584014    | 0.019692 |
|                                               | Liver_weight/Body_weight  | X387.193_2.842  | No annotation                                  | -0.55604    | 0.019886 |
|                                               | Liver_weight/Body_weight  | X811.309_2.773  | No annotation                                  | 0.519417    | 0.030487 |
|                                               | Ejection_Fraction         | X811.309_2.773  | No annotation                                  | 0.469188    | 0.049883 |
|                                               | P Amplitude (V)           | X792.329_2.764  | No annotation                                  | -0.47378    | 0.049883 |
| Not restored by any treatment                 | Liver_weight/Body_weight  | X682.363_3.329  | No annotation                                  | -0.71238    | 0.002042 |
|                                               | Liver_weight/Body_weight  | X256.264_3.225  | Palmitamide_C16H33NO                           | -0.67113    | 0.003469 |
|                                               | Ejection_Fraction         | X416.337_2.79   | CAR 16:0;O_C23H45NO5                           | 0.669968    | 0.003469 |
|                                               | Liver_weight/Body_weight  | X128.018_0.344  | No annotation                                  | 0.645294    | 0.004533 |
|                                               | Liver_weight/Body_weight  | X476.24_2.164   | No annotation                                  | -0.64133    | 0.004533 |
|                                               | Liver_weight/Body_weight  | X682.364_3.313  | No annotation                                  | 0.642567    | 0.004533 |
|                                               | Liver_weight/Body_weight  | X475.989_2.164  | No annotation                                  | -0.62451    | 0.006537 |
|                                               | Liver_weight/Body_weight  | X296.258_2.976  | No annotation                                  | -0.60151    | 0.007792 |
|                                               | Liver_weight/Body_weight  | X380.993_2.164  | No annotation                                  | -0.60843    | 0.007792 |
|                                               | Liver_weight/Body_weight  | X440.337_2.765  | CAR 18:2;O_C25H45NO5                           | 0.600116    | 0.007792 |
|                                               | Liver_weight/Body_weight  | X442.353_2.823  | CAR 18:1;O_C25H47NO5                           | 0.602918    | 0.007792 |
|                                               | Liver_weight/Body_weight  | X466.25_2.226   | No annotation                                  | -0.59972    | 0.007792 |
|                                               | P Amplitude (V)           | X351.217_2.741  | No annotation                                  | 0.57269     | 0.014708 |

|                          |                |                      |          |          |
|--------------------------|----------------|----------------------|----------|----------|
| Liver_weight/Body_weight | X137.046_0.35  | Hypoxanthine_C5H4N4O | -0.55591 | 0.018702 |
| Liver_weight/Body_weight | X416.337_2.79  | CAR 16:0;O_C23H45NO5 | 0.547621 | 0.018702 |
| Ejection_Fraction        | X440.337_2.765 | CAR 18:2;O_C25H45NO5 | 0.547234 | 0.018702 |
| Ejection_Fraction        | X442.353_2.823 | CAR 18:1;O_C25H47NO5 | 0.556979 | 0.018702 |
| PR Interval (s)          | X440.337_2.765 | CAR 18:2;O_C25H45NO5 | 0.548586 | 0.018702 |
| CD3.CD8.IFN $\gamma$ .   | X256.264_3.225 | Palmitamide_C16H33NO | 0.552468 | 0.018702 |
| Liver_weight/Body_weight | X458.23_2.165  | No annotation        | -0.54307 | 0.01957  |
| Liver_weight/Body_weight | X136.062_0.301 | No annotation        | -0.53316 | 0.023352 |
| Liver_weight/Body_weight | X580.362_2.984 | PC 20:1;O_C28H54NO9P | 0.52401  | 0.027288 |
| CD3.CD8.IFN $\gamma$ .   | X136.097_0.551 | No annotation        | -0.52034 | 0.028264 |
| Ejection_Fraction        | X256.264_3.225 | Palmitamide_C16H33NO | -0.50894 | 0.034487 |
| Liver_weight/Body_weight | X136.097_0.551 | No annotation        | 0.506943 | 0.03451  |
| P Amplitude (V)          | X580.362_2.984 | PC 20:1;O_C28H54NO9P | -0.50096 | 0.037518 |
| Liver_weight/Body_weight | X203.007_0.309 | No annotation        | -0.4885  | 0.043147 |
| P Amplitude (V)          | X420.899_2.103 | No annotation        | 0.489322 | 0.043147 |
| CD3.CD8.IFN $\gamma$ .   | X476.24_2.164  | No annotation        | 0.489205 | 0.043147 |
| Liver_weight/Body_weight | X351.217_2.741 | No annotation        | -0.48664 | 0.043252 |
| Liver_weight/Body_weight | X137.046_0.42  | No annotation        | -0.48403 | 0.044031 |

---

**Supplementary Table 22. Correlation between disease metadata and small molecule peak area at 142DPI in RVT heart section.** N=15 mice per group and per position. Note that correlations are performed separately for each treatment effects, so the list of features that met our FDR-corrected p-value cutoff of <0.05 may not fully overlap between “Small molecules restored by any treatment” and small molecules restored by individual treatments. Source data are provided as a Source Data file. BNZ, benznidazole. FDR, false discovery rate. PC, glycerophosphocholine.

| Effect of treatment                           | Disease severity metadata | Small molecules | Annotation    | Correlation | FDR_pval |
|-----------------------------------------------|---------------------------|-----------------|---------------|-------------|----------|
| Small molecules restored by any treatment     | Liver_weight/Body_weight  | X249.112_2.768  | No annotation | 0.709902    | 0.002419 |
|                                               | Liver_weight/Body_weight  | X489.228_2.768  | No annotation | 0.646489    | 0.004105 |
|                                               | Liver_weight/Body_weight  | X599.241_2.765  | No annotation | 0.652943    | 0.004105 |
|                                               | Ejection_Fraction         | X249.112_2.768  | No annotation | 0.668012    | 0.004105 |
|                                               | Ejection_Fraction         | X489.228_2.768  | No annotation | 0.647608    | 0.004105 |
|                                               | Ejection_Fraction         | X792.329_2.764  | No annotation | 0.650838    | 0.004105 |
|                                               | Liver_weight/Body_weight  | X200.165_3.207  | No annotation | -0.63854    | 0.004538 |
|                                               | Ejection_Fraction         | X369.17_2.767   | No annotation | 0.628921    | 0.005351 |
|                                               | Liver_weight/Body_weight  | X111.044_2.768  | No annotation | 0.623457    | 0.00561  |
|                                               | Liver_weight/Body_weight  | X792.329_2.764  | No annotation | 0.612692    | 0.006423 |
|                                               | Ejection_Fraction         | X599.241_2.765  | No annotation | 0.612013    | 0.006423 |
|                                               | Ejection_Fraction         | X111.044_2.768  | No annotation | 0.591684    | 0.010371 |
|                                               | Liver_weight/Body_weight  | X130.087_0.452  | No annotation | -0.5844     | 0.011621 |
|                                               | Liver_weight/Body_weight  | X175.148_2.71   | No annotation | -0.5726     | 0.014631 |
|                                               | QTc (s)                   | X198.15_2.471   | No annotation | -0.56396    | 0.016947 |
|                                               | Liver_weight/Body_weight  | X198.15_2.471   | No annotation | -0.5479     | 0.023371 |
|                                               | Liver_weight/Body_weight  | X333.063_2.524  | No annotation | -0.53477    | 0.029741 |
| Restored only by BNZ + Tc24 vaccine treatment | Liver_weight/Body_weight  | X130.087_0.452  | No annotation | -0.5844     | 0.02643  |
|                                               | Liver_weight/Body_weight  | X175.148_2.71   | No annotation | -0.5726     | 0.02643  |
| Restored by both treatments                   | Liver_weight/Body_weight  | X249.112_2.768  | No annotation | 0.709902    | 0.001717 |
|                                               | Liver_weight/Body_weight  | X489.228_2.768  | No annotation | 0.646489    | 0.002913 |
|                                               | Liver_weight/Body_weight  | X599.241_2.765  | No annotation | 0.652943    | 0.002913 |
|                                               | Ejection_Fraction         | X249.112_2.768  | No annotation | 0.668012    | 0.002913 |
|                                               | Ejection_Fraction         | X489.228_2.768  | No annotation | 0.647608    | 0.002913 |
|                                               | Ejection_Fraction         | X792.329_2.764  | No annotation | 0.650838    | 0.002913 |
|                                               | Liver_weight/Body_weight  | X200.165_3.207  | No annotation | -0.63854    | 0.00322  |
|                                               | Ejection_Fraction         | X369.17_2.767   | No annotation | 0.628921    | 0.003797 |
|                                               | Liver_weight/Body_weight  | X111.044_2.768  | No annotation | 0.623457    | 0.003981 |

|                               |                          |                |                              |          |          |
|-------------------------------|--------------------------|----------------|------------------------------|----------|----------|
|                               | Liver_weight/Body_weight | X792.329_2.764 | No annotation                | 0.612692 | 0.004558 |
|                               | Ejection_Fraction        | X599.241_2.765 | No annotation                | 0.612013 | 0.004558 |
|                               | Ejection_Fraction        | X111.044_2.768 | No annotation                | 0.591684 | 0.00736  |
|                               | QTc (s)                  | X198.15_2.471  | No annotation                | -0.56396 | 0.013877 |
|                               | Liver_weight/Body_weight | X198.15_2.471  | No annotation                | -0.5479  | 0.018955 |
|                               | Liver_weight/Body_weight | X333.063_2.524 | No annotation                | -0.53477 | 0.023921 |
|                               | Liver_weight/Body_weight | X216.16_2.471  | No annotation                | -0.50313 | 0.044246 |
|                               | Liver_weight/Body_weight | X604.362_2.948 | PC 22:3;O_C30H54NO9P         | -0.49922 | 0.045094 |
| Not restored by any treatment | Liver_weight/Body_weight | X137.046_0.35  | Hypoxanthine_C5H4N4O         | -0.73039 | 0.000617 |
|                               | Liver_weight/Body_weight | X278.248_3.1   | No annotation                | -0.72638 | 0.000617 |
|                               | Liver_weight/Body_weight | X280.264_3.159 | No annotation                | -0.69456 | 0.001539 |
|                               | Liver_weight/Body_weight | X268.105_0.35  | Adenosine_C10H13N5O4         | -0.6551  | 0.004786 |
|                               | Liver_weight/Body_weight | X228.196_2.71  | No annotation                | -0.6298  | 0.008604 |
|                               | Liver_weight/Body_weight | X256.227_2.847 | No annotation                | -0.6229  | 0.008833 |
|                               | Liver_weight/Body_weight | X242.212_2.78  | No annotation                | -0.59375 | 0.013134 |
|                               | Liver_weight/Body_weight | X296.259_2.971 | No annotation                | -0.6002  | 0.013134 |
|                               | Liver_weight/Body_weight | X306.279_2.989 | No annotation                | -0.58729 | 0.013134 |
|                               | Ejection_Fraction        | X269.088_0.35  | Inosine_C10H12N4O5           | -0.58843 | 0.013134 |
|                               | P Amplitude (V)          | X272.222_2.957 | N-Lauroylsarcosine_C15H29NO3 | 0.593771 | 0.013134 |
|                               | Liver_weight/Body_weight | X306.279_3.212 | No annotation                | -0.57016 | 0.018742 |
|                               | Liver_weight/Body_weight | X308.295_3.045 | No annotation                | -0.56059 | 0.021925 |
|                               | Liver_weight/Body_weight | X258.207_2.775 | No annotation                | -0.54813 | 0.027175 |
|                               | Liver_weight/Body_weight | X282.28_3.246  | Oleamide_C18H35NO            | -0.54278 | 0.027175 |
|                               | Liver_weight/Body_weight | X308.295_3.285 | No annotation                | -0.54323 | 0.027175 |
|                               | Liver_weight/Body_weight | X399.395_3.152 | No annotation                | 0.539657 | 0.027463 |
|                               | Liver_weight/Body_weight | X811.31_2.767  | No annotation                | 0.537175 | 0.027463 |
|                               | Ejection_Fraction        | X399.395_3.152 | No annotation                | 0.533812 | 0.028069 |
|                               | Liver_weight/Body_weight | X399.394_3.159 | No annotation                | -0.52046 | 0.035771 |
|                               | P Amplitude (V)          | X811.309_2.773 | No annotation                | 0.513207 | 0.039769 |
|                               | Ejection_Fraction        | X137.046_0.35  | Hypoxanthine_C5H4N4O         | -0.50078 | 0.049107 |

**Supplementary Table 23. Correlation between disease metadata and small molecule peak area at 142 DPI in RVB heart section.** N=15 mice per group and per position. Note that correlations are performed separately for each treatment effects, so the list of features that met our FDR-corrected p-value cutoff of <0.05 may not fully overlap between “Small molecules restored by any treatment” and small molecules restored by individual treatments. Source data are provided as a Source Data file. BNZ, benznidazole. FDR, false discovery rate. PC, glycerophosphocholine. LPC, lysoglycerophosphocholine.

| Effect of treatment                           | Disease severity metadata | Small molecules | Annotation           | Correlation | FDR_pval |
|-----------------------------------------------|---------------------------|-----------------|----------------------|-------------|----------|
| Small molecules restored by any treatment     | Ejection_Fraction         | X142.035_0.315  | No annotation        | -0.59822    | 0.044391 |
|                                               | Ejection_Fraction         | X214.181_2.634  | No annotation        | -0.58665    | 0.044391 |
|                                               | Ejection_Fraction         | X300.199_2.264  | No annotation        | -0.58855    | 0.044391 |
| Restored only by BNZ + Tc24 vaccine treatment | Ejection_Fraction         | X142.035_0.315  | No annotation        | -0.59822    | 0.02143  |
|                                               | Ejection_Fraction         | X214.181_2.634  | No annotation        | -0.58665    | 0.02143  |
|                                               | Ejection_Fraction         | X300.199_2.264  | No annotation        | -0.58855    | 0.02143  |
|                                               | Liver_weight/Body_weight  | X795.335_2.768  | No annotation        | 0.553911    | 0.036624 |
|                                               | Liver_weight/Body_weight  | X300.199_2.264  | No annotation        | -0.54172    | 0.038991 |
|                                               | Liver_weight/Body_weight  | X308.295_3.045  | No annotation        | -0.52454    | 0.047753 |
| Not restored by any treatment                 | Liver_weight/Body_weight  | X528.311_2.928  | No annotation        | -0.72462    | 0.001459 |
|                                               | Liver_weight/Body_weight  | X790.38_2.768   | No annotation        | 0.678091    | 0.004692 |
|                                               | Liver_weight/Body_weight  | X111.044_2.768  | No annotation        | 0.655559    | 0.005823 |
|                                               | Liver_weight/Body_weight  | X137.046_0.35   | Hypoxanthine_C5H4N4O | -0.64404    | 0.005823 |
|                                               | Liver_weight/Body_weight  | X249.112_2.768  | No annotation        | 0.640246    | 0.005823 |
|                                               | Liver_weight/Body_weight  | X489.228_2.768  | No annotation        | 0.639368    | 0.005823 |
|                                               | Liver_weight/Body_weight  | X105.07_2.767   | No annotation        | 0.609102    | 0.006842 |
|                                               | Liver_weight/Body_weight  | X267.123_2.767  | No annotation        | 0.614221    | 0.006842 |
|                                               | Liver_weight/Body_weight  | X268.105_0.35   | Adenosine_C10H13N5O4 | -0.62056    | 0.006842 |
|                                               | Liver_weight/Body_weight  | X285.133_2.768  | No annotation        | 0.613108    | 0.006842 |
|                                               | Liver_weight/Body_weight  | X369.17_2.767   | No annotation        | 0.613775    | 0.006842 |
|                                               | Liver_weight/Body_weight  | X404.207_2.768  | No annotation        | 0.628686    | 0.006842 |
|                                               | Liver_weight/Body_weight  | X406.154_2.765  | No annotation        | 0.608212    | 0.006842 |
|                                               | Liver_weight/Body_weight  | X387.181_2.767  | No annotation        | 0.604429    | 0.00707  |
|                                               | Liver_weight/Body_weight  | X486.098_2.765  | No annotation        | 0.595812    | 0.008376 |
|                                               | Liver_weight/Body_weight  | X511.21_3.171   | No annotation        | -0.59039    | 0.008558 |
|                                               | Liver_weight/Body_weight  | X599.241_2.765  | No annotation        | 0.591364    | 0.008558 |
|                                               | Liver_weight/Body_weight  | X269.088_0.35   | Inosine_C10H12N4O5   | -0.58818    | 0.008573 |

|                          |                |                                                                                               |          |          |
|--------------------------|----------------|-----------------------------------------------------------------------------------------------|----------|----------|
| Liver_weight/Body_weight | X306.279_3.212 | No annotation                                                                                 | -0.58418 | 0.00903  |
| Liver_weight/Body_weight | X303.648_2.884 | No annotation                                                                                 | -0.57563 | 0.010706 |
| Liver_weight/Body_weight | X608.227_2.768 | No annotation                                                                                 | 0.568927 | 0.012081 |
| Liver_weight/Body_weight | X430.223_2.768 | No annotation                                                                                 | 0.566704 | 0.012189 |
| Liver_weight/Body_weight | X475.989_2.164 | No annotation                                                                                 | -0.56371 | 0.012555 |
| Liver_weight/Body_weight | X415.14_2.768  | No annotation                                                                                 | 0.561478 | 0.01271  |
| Liver_weight/Body_weight | X446.218_2.884 | No annotation                                                                                 | 0.553466 | 0.013709 |
| Liver_weight/Body_weight | X637.306_3.32  | No annotation                                                                                 | -0.55525 | 0.013709 |
| Liver_weight/Body_weight | X792.329_2.764 | No annotation                                                                                 | 0.553678 | 0.013709 |
| Liver_weight/Body_weight | X278.248_3.1   | No annotation                                                                                 | -0.54946 | 0.014536 |
| Ejection_Fraction        | X278.248_3.1   | No annotation                                                                                 | -0.54216 | 0.016637 |
| Ejection_Fraction        | X269.088_0.35  | Inosine_C10H12N4O5                                                                            | -0.5208  | 0.025788 |
| Ejection_Fraction        | X280.264_3.159 | No annotation                                                                                 | -0.51947 | 0.025788 |
| Liver_weight/Body_weight | X280.264_3.159 | No annotation                                                                                 | -0.51541 | 0.027244 |
| Liver_weight/Body_weight | X476.24_2.164  | No annotation                                                                                 | -0.50751 | 0.030266 |
| Liver_weight/Body_weight | X570.357_2.934 | LPC 22:5_C30H52NO7P or LPC 22:5_C30H52NO7P or LPC O-22:6;O_C30H52NO7P or PC O-22:5_C30H52NO7P | -0.50868 | 0.030266 |
| Ejection_Fraction        | X654.332_3.32  | No annotation                                                                                 | -0.50389 | 0.03168  |
| Ejection_Fraction        | X637.306_3.32  | No annotation                                                                                 | -0.49588 | 0.035253 |
| QTc (s)                  | X303.648_2.884 | No annotation                                                                                 | -0.49604 | 0.035253 |
| P Amplitude (V)          | X476.24_2.164  | No annotation                                                                                 | 0.491619 | 0.037369 |
| Liver_weight/Body_weight | X654.332_3.32  | No annotation                                                                                 | -0.48804 | 0.039071 |
| Ejection_Fraction        | X511.21_3.171  | No annotation                                                                                 | -0.48183 | 0.042973 |
| QTc (s)                  | X111.044_2.768 | No annotation                                                                                 | 0.473831 | 0.04881  |

---

## Supplementary References

- 1 Schubert, M., Lindgreen, S. & Orlando, L. AdapterRemoval v2: rapid adapter trimming, identification, and read merging. *BMC Res Notes* **9**, 88, doi:10.1186/s13104-016-1900-2 (2016).
- 2 Patro, R., Duggal, G., Love, M. I., Irizarry, R. A. & Kingsford, C. Salmon provides fast and bias-aware quantification of transcript expression. *Nat Methods* **14**, 417-419, doi:10.1038/nmeth.4197 (2017).
- 3 Sonesson, C., Love, M. I. & Robinson, M. D. Differential analyses for RNA-seq: transcript-level estimates improve gene-level inferences. *F1000Research* **4**, 1521, doi:10.12688/f1000research.7563.2 (2015).
- 4 Love, M. I., Huber, W. & Anders, S. Moderated estimation of fold change and dispersion for RNA-seq data with DESeq2. *Genome Biol* **15**, 550, doi:10.1186/s13059-014-0550-8 (2014).
- 5 Deng, K. *et al.* WavelCA 2.0: a novel batch effect removal method for untargeted metabolomics data without using batch information. *Metabolomics* **17**, 87, doi:10.1007/s11306-021-01839-7 (2021).
- 6 Bolyen, E. *et al.* Reproducible, interactive, scalable and extensible microbiome data science using QIIME 2. *Nat Biotechnol* **37**, 852-857, doi:10.1038/s41587-019-0209-9 (2019).
